# Supplementary material for: Efficacy of Cancer Immunotherapy: An Umbrella Review of Meta-Analyses of Randomized Controlled Trials
Source: PubMed Central journal article supplement (PMC6895783; doi:10.3390/cancers11111801), 2019-11-15

Supplementary Materials

# Efficacy of Cancer Immunotherapy: An Umbrella Review of Meta-analyses of Randomized Controlled Trials

Jong Yeob Kim, Keum Hwa Lee, Michael Eisenhut, Hans J. van der Vliet, Andreas Kronbichler, Gwang Hun Jeong, Jae Il Shin and Gabriele Gamberith

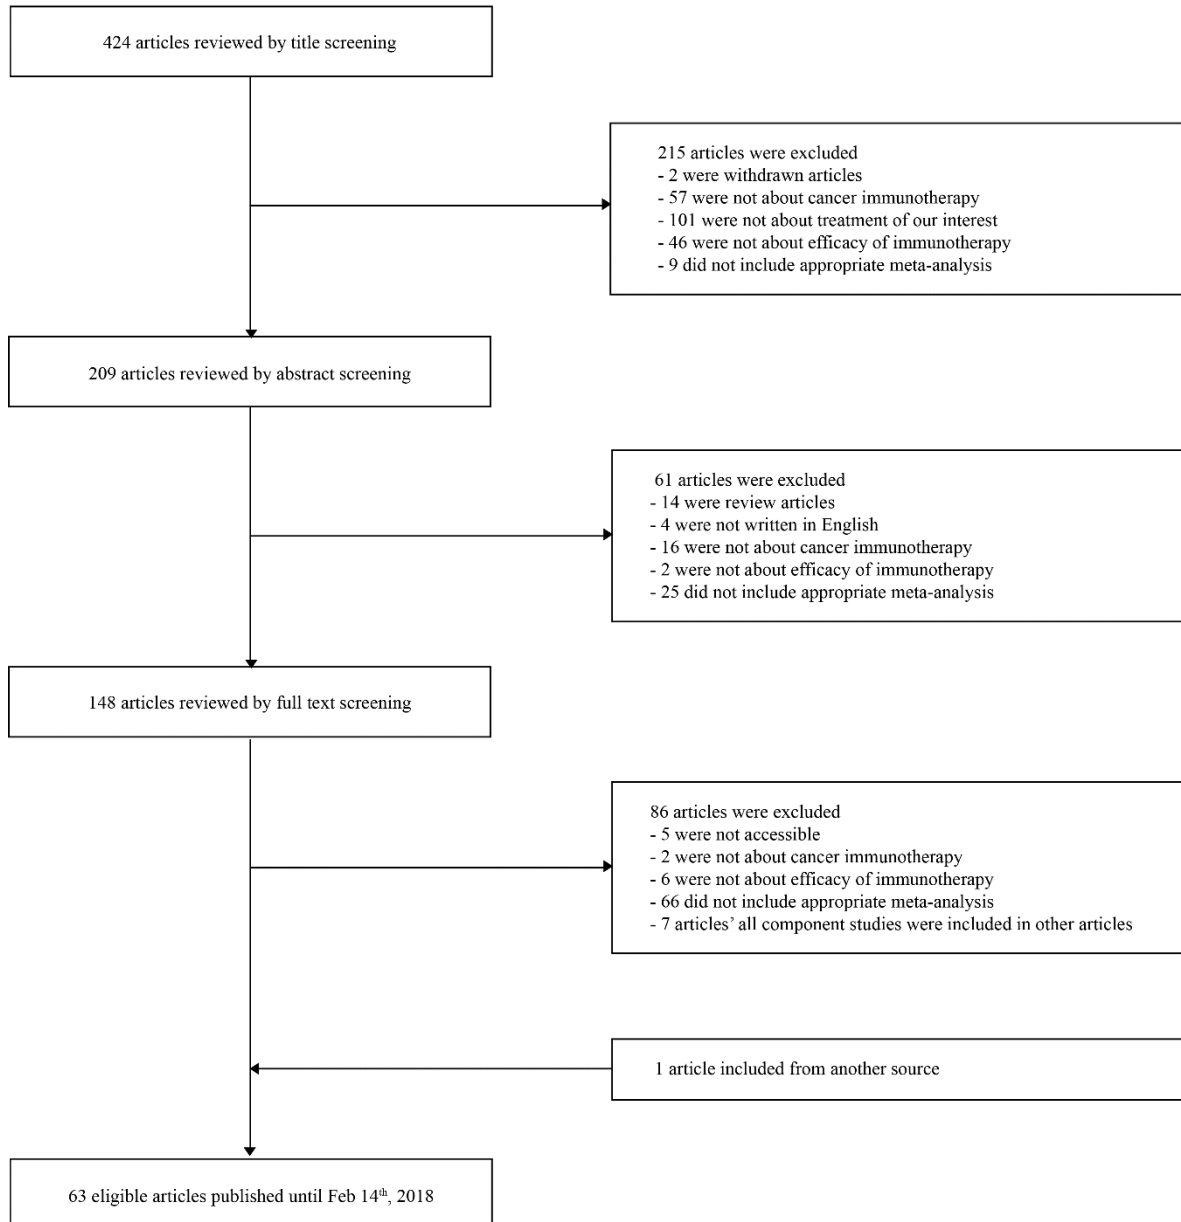

Figure S1. Flow chart of literature search.

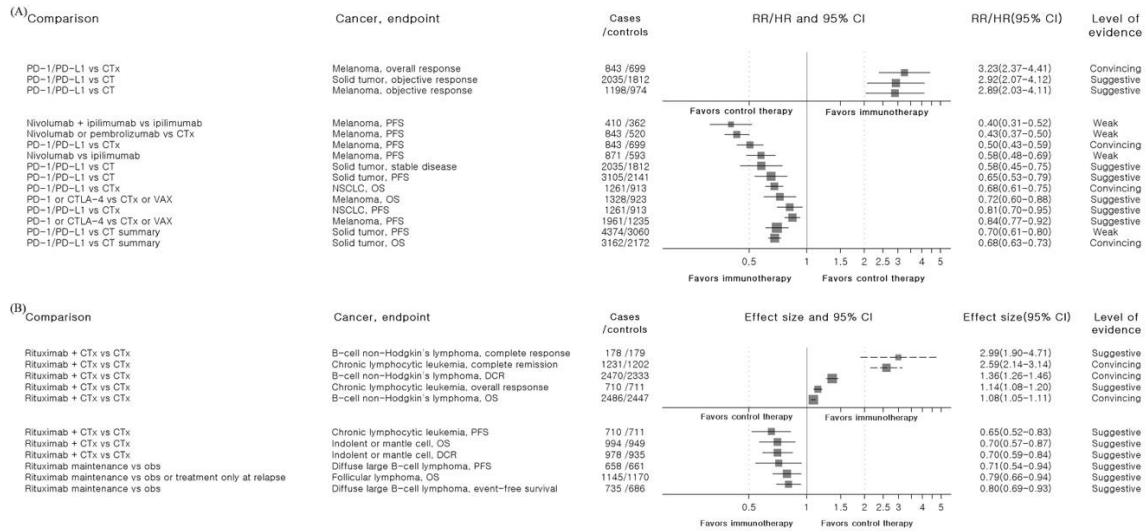

**Figure S2. (A)** Effect size and level of evidence reported in meta-analyses of cancer therapeutic anti-PD-1/PD-L1 monoclonal antibodies. **(B)** Effect size and level of evidence reported in meta-analyses of cancer therapeutic anti-CD20 monoclonal antibodies. Solid horizontal lines represent risk ratio or hazard ratio; dotted horizontal lines represent odds ratio.

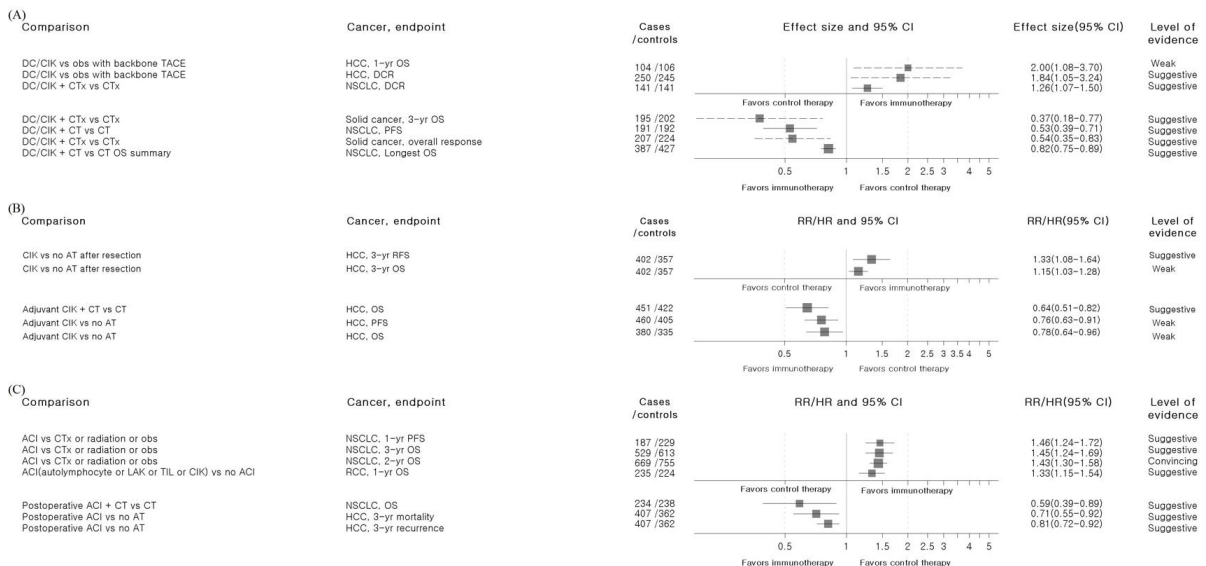

**Figure S3. (A)** Effect size and level of evidence reported in meta-analyses of cancer therapeutic DC/CIK (dendritic cells/ cytokine-induced killer cells). **(B)** Effect size and level of evidence reported in meta-analyses of cancer therapeutic CIK. **(C)** 5. Effect size and level of evidence reported in meta-analyses of adoptive cell immunotherapy for cancer. Solid horizontal lines represent risk ratio or hazard ratio; dotted horizontal lines represent odds ratio.

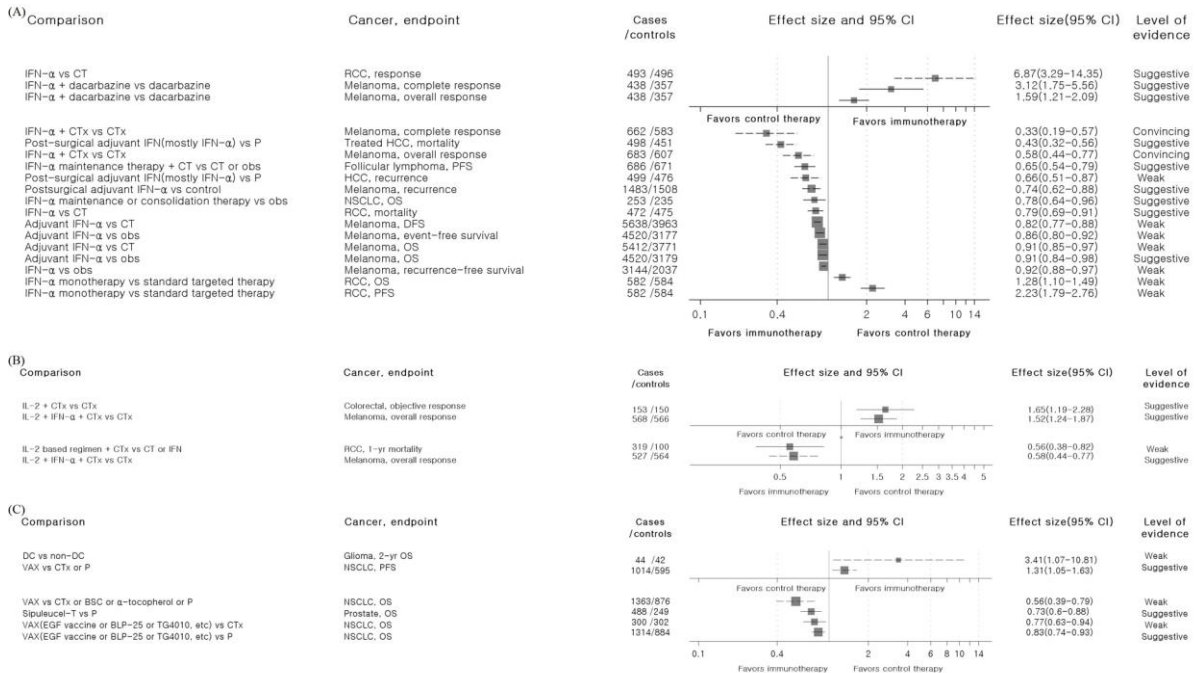

**Figure S4.** (A) Effect size and level of evidence reported in meta-analyses of cancer therapeutic interferon- $\alpha$ . (B) Effect size and level of evidence reported in meta-analyses of cancer therapeutic interleukin-2. (C) Effect size and level of evidence reported in meta-analyses of cancer vaccines. Solid horizontal lines represent risk ratio or hazard ratio; dotted horizontal lines represent odds ratio.

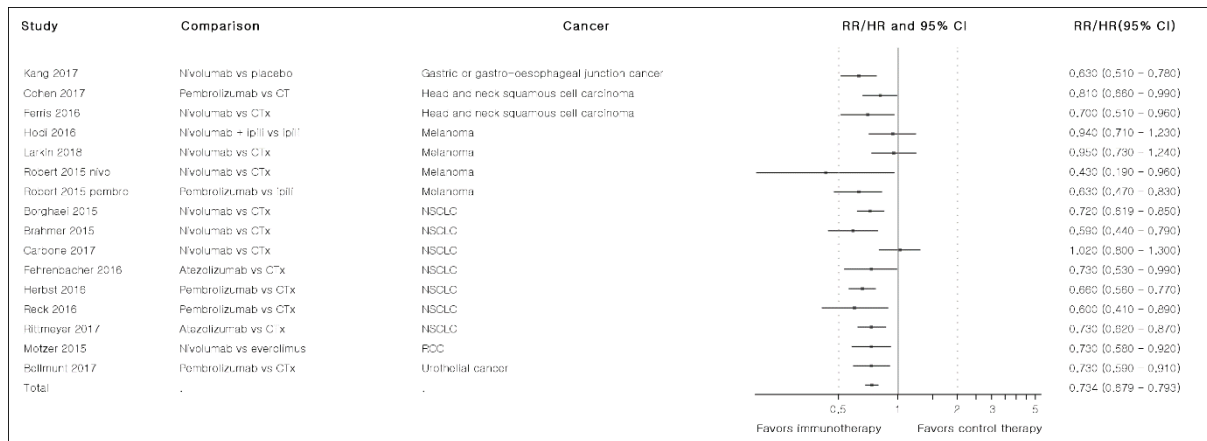

**Figure S5.** Anti-PD-1/PD-L1 mAb treatment on solid tumor, Overall Survival (OS).

**References**

1. Bellmunt J, de Wit R, Vaughn DJ, et al. Pembrolizumab as Second-Line Therapy for Advanced Urothelial Carcinoma. *N Engl J Med.* 2017;376(11):1015-1026. doi:10.1056/NEJMoa1613683
2. Borghaei H, Paz-Ares L, Horn L, et al. Nivolumab versus Docetaxel in Advanced Nonsquamous Non-Small-Cell Lung Cancer. *N Engl J Med.* 2015;373(17):1627-1639. doi:10.1056/NEJMoa1507643
3. Brahmer J, Reckamp KL, Baas P, et al. Nivolumab versus Docetaxel in Advanced Squamous-Cell Non-Small-Cell Lung Cancer. *N Engl J Med.* 2015;373(2):123-135. doi:10.1056/NEJMoa1504627
4. Carbone DP, Reck M, Paz-Ares L, et al. First-Line Nivolumab in Stage IV or Recurrent Non-Small-Cell Lung Cancer. *N Engl J Med.* 2017;376(25):2415-2426. doi:10.1056/NEJMoa1613493
5. Cohen EE, Harrington KJ, Tourneau C Le, Dinis J, Licitra L, Ahn M-J. Pembrolizumab (pembro) vs standard of care (SOC) for recurrent or metastatic head and neck squamous cell carcinoma (R/M HNSCC): Phase 3 KEYNOTE-040 trial. *Nejm.* 2001;345(26):1890-1900. doi:10.1200/jco.2015.33.15

6. Fehrenbacher L, Spira A, Ballinger M, et al. Atezolizumab versus docetaxel for patients with previously treated non-small-cell lung cancer (POPLAR): a multicentre, open-label, phase 2 randomised controlled trial. *Lancet* (London, England). 2016;387(10030):1837-1846. doi:10.1016/S0140-6736(16)00587-0
7. Ferris RL, Blumenschein G, Fayette J, et al. Nivolumab for Recurrent Squamous-Cell Carcinoma of the Head and Neck. *N Engl J Med*. 2016;375(19):1856-1867. doi:10.1056/NEJMoa1602252
8. Herbst RS, Baas P, Kim D-W, et al. Pembrolizumab versus docetaxel for previously treated, PD-L1-positive, advanced non-small-cell lung cancer (KEYNOTE-010): a randomised controlled trial. *Lancet* (London, England). 2016;387(10027):1540-1550. doi:10.1016/S0140-6736(15)01281-7
9. Hodi FS, Chesney J, Pavlick AC, et al. Combined nivolumab and ipilimumab versus ipilimumab alone in patients with advanced melanoma: 2-year overall survival outcomes in a multicentre, randomised, controlled, phase 2 trial. *Lancet Oncol*. 2016;17(11):1558-1568. doi:10.1016/S1470-2045(16)30366-7
10. Kang Y-K, Boku N, Satoh T, et al. Nivolumab in patients with advanced gastric or gastro-oesophageal junction cancer refractory to, or intolerant of, at least two previous chemotherapy regimens (ONO-4538-12, ATTRACTION-2): a randomised, double-blind, placebo-controlled, phase 3 trial. *Lancet* (London, England). 2017;390(10111):2461-2471. doi:10.1016/S0140-6736(17)31827-5
11. Larkin J, Minor D, D'Angelo S, et al. Overall Survival in Patients With Advanced Melanoma Who Received Nivolumab Versus Investigator's Choice Chemotherapy in CheckMate 037: A Randomized, Controlled, Open-Label Phase III Trial. *J Clin Oncol*. 2018;36(4):383-390. doi:10.1200/JCO.2016.71.8023
12. Motzer RJ, Escudier B, McDermott DF, et al. Nivolumab versus Everolimus in Advanced Renal-Cell Carcinoma. *N Engl J Med*. 2015;373(19):1803-1813. doi:10.1056/NEJMoa1510665
13. Reck M, Rodríguez-Abreu D, Robinson AG, et al. Pembrolizumab versus Chemotherapy for PD-L1-Positive Non-Small-Cell Lung Cancer. *N Engl J Med*. 2016;375(19):1823-1833. doi:10.1056/NEJMoa1606774
14. Rittmeyer A, Barlesi F, Waterkamp D, et al. Atezolizumab versus docetaxel in patients with previously treated non-small-cell lung cancer (OAK): a phase 3, open-label, multicentre randomised controlled trial. *Lancet*. 2017;389(10066):255-265. doi:10.1016/S0140-6736(16)32517-X
15. Robert C, Long G V., Brady B, et al. Nivolumab in Previously Untreated Melanoma without BRAF Mutation. *N Engl J Med*. 2015;372(4):320-330. doi:10.1056/NEJMoa1412082

Robert C, Schachter J, Long G V., et al. Pembrolizumab versus Ipilimumab in Advanced Melanoma. *N Engl J Med*. 2015;372(26):2521-2532. doi:10.1056/NEJMoa1503093

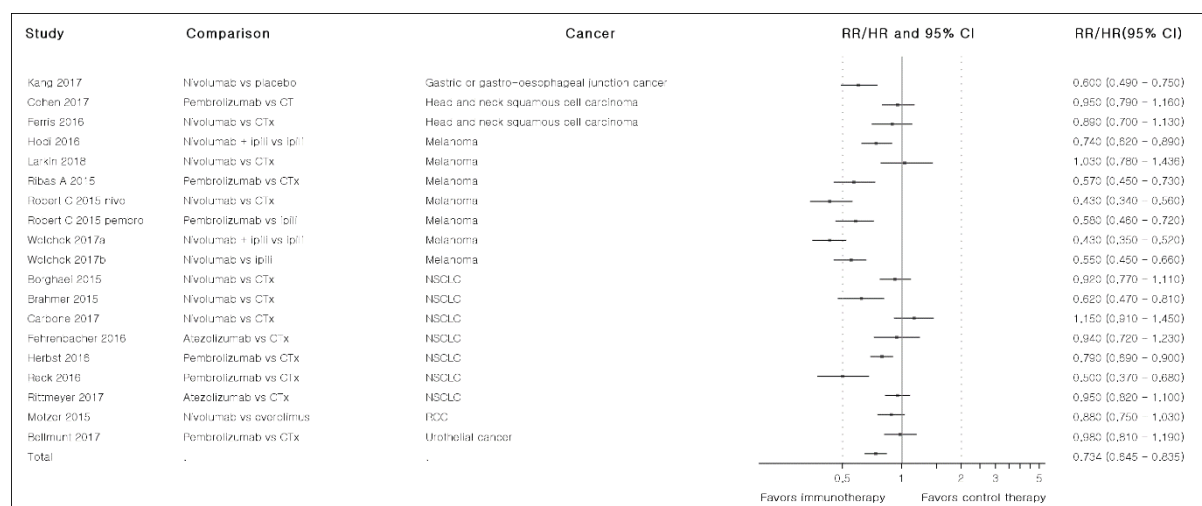

**Figure S6.** Anti-PD-1/PD-L1 mAb treatment on solid tumor, Progression-Free Survival (PFS)

16. Bellmunt J, de Wit R, Vaughn DJ, et al. Pembrolizumab as Second-Line Therapy for Advanced Urothelial Carcinoma. *N Engl J Med.* 2017;376(11):1015-1026. doi:10.1056/NEJMoa1613683
17. Borghaei H, Paz-Ares L, Horn L, et al. Nivolumab versus Docetaxel in Advanced Nonsquamous Non-Small-Cell Lung Cancer. *N Engl J Med.* 2015;373(17):1627-1639. doi:10.1056/NEJMoa1507643
18. Brahmer J, Reckamp KL, Baas P, et al. Nivolumab versus Docetaxel in Advanced Squamous-Cell Non-Small-Cell Lung Cancer. *N Engl J Med.* 2015;373(2):123-135. doi:10.1056/NEJMoa1504627
19. Carbone DP, Reck M, Paz-Ares L, et al. First-Line Nivolumab in Stage IV or Recurrent Non-Small-Cell Lung Cancer. *N Engl J Med.* 2017;376(25):2415-2426. doi:10.1056/NEJMoa1613493
20. Cohen EE, Harrington KJ, Tourneau C Le, Dinis J, Licitra L, Ahn M-J. Pembrolizumab (pembro) vs standard of care (SOC) for recurrent or metastatic head and neck squamous cell carcinoma (R/M HNSCC): Phase 3 KEYNOTE-040 trial. *Nejm.* 2001;345(26):1890-1900. doi:10.1200/jco.2015.33.15
21. Fehrenbacher L, Spira A, Ballinger M, et al. Atezolizumab versus docetaxel for patients with previously treated non-small-cell lung cancer (POPLAR): a multicentre, open-label, phase 2 randomised controlled trial. *Lancet (London, England).* 2016;387(10030):1837-1846. doi:10.1016/S0140-6736(16)00587-0
22. Ferris RL, Blumenschein G, Fayette J, et al. Nivolumab for Recurrent Squamous-Cell Carcinoma of the Head and Neck. *N Engl J Med.* 2016;375(19):1856-1867. doi:10.1056/NEJMoa1602252
23. Herbst RS, Baas P, Kim D-W, et al. Pembrolizumab versus docetaxel for previously treated, PD-L1-positive, advanced non-small-cell lung cancer (KEYNOTE-010): a randomised controlled trial. *Lancet (London, England).* 2016;387(10027):1540-1550. doi:10.1016/S0140-6736(15)01281-7
24. Hodi FS, Chesney J, Pavlick AC, et al. Combined nivolumab and ipilimumab versus ipilimumab alone in patients with advanced melanoma: 2-year overall survival outcomes in a multicentre, randomised, controlled, phase 2 trial. *Lancet Oncol.* 2016;17(11):1558-1568. doi:10.1016/S1470-2045(16)30366-7
25. Kang Y-K, Boku N, Satoh T, et al. Nivolumab in patients with advanced gastric or gastro-oesophageal junction cancer refractory to, or intolerant of, at least two previous chemotherapy regimens (ONO-4538-12, ATTRACTION-2): a randomised, double-blind, placebo-controlled, phase 3 trial. *Lancet (London, England).* 2017;390(10111):2461-2471. doi:10.1016/S0140-6736(17)31827-5
26. Larkin J, Minor D, D'Angelo S, et al. Overall Survival in Patients With Advanced Melanoma Who Received Nivolumab Versus Investigator's Choice Chemotherapy in CheckMate 037: A Randomized, Controlled, Open-Label Phase III Trial. *J Clin Oncol.* 2018;36(4):383-390. doi:10.1200/JCO.2016.71.8023
27. Motzer RJ, Escudier B, McDermott DF, et al. Nivolumab versus Everolimus in Advanced Renal-Cell Carcinoma. *N Engl J Med.* 2015;373(19):1803-1813. doi:10.1056/NEJMoa1510665
28. Reck M, Rodríguez-Abreu D, Robinson AG, et al. Pembrolizumab versus Chemotherapy for PD-L1-Positive Non-Small-Cell Lung Cancer. *N Engl J Med.* 2016;375(19):1823-1833. doi:10.1056/NEJMoa1606774
29. Ribas A, Puzanov I, Dummer R, et al. Pembrolizumab versus investigator-choice chemotherapy for ipilimumab-refractory melanoma (KEYNOTE-002): a randomised, controlled, phase 2 trial. *Lancet Oncol.* 2015;16(8):908-918. doi:10.1016/S1470-2045(15)00083-2

30. Rittmeyer A, Barlesi F, Waterkamp D, et al. Atezolizumab versus docetaxel in patients with previously treated non-small-cell lung cancer (OAK): a phase 3, open-label, multicentre randomised controlled trial. *Lancet*. 2017;389(10066):255-265. doi:10.1016/S0140-6736(16)32517-X
31. Robert C, Long G V., Brady B, et al. Nivolumab in Previously Untreated Melanoma without BRAF Mutation. *N Engl J Med*. 2015;372(4):320-330. doi:10.1056/NEJMoa1412082
32. Robert C, Schachter J, Long G V., et al. Pembrolizumab versus Ipilimumab in Advanced Melanoma. *N Engl J Med*. 2015;372(26):2521-2532. doi:10.1056/NEJMoa1503093
33. Wolchok JD, Chiarion-Sileni V, Gonzalez R, et al. Overall Survival with Combined Nivolumab and Ipilimumab in Advanced Melanoma. *N Engl J Med*. 2017;377(14):1345-1356. doi:10.1056/NEJMoa1709684.

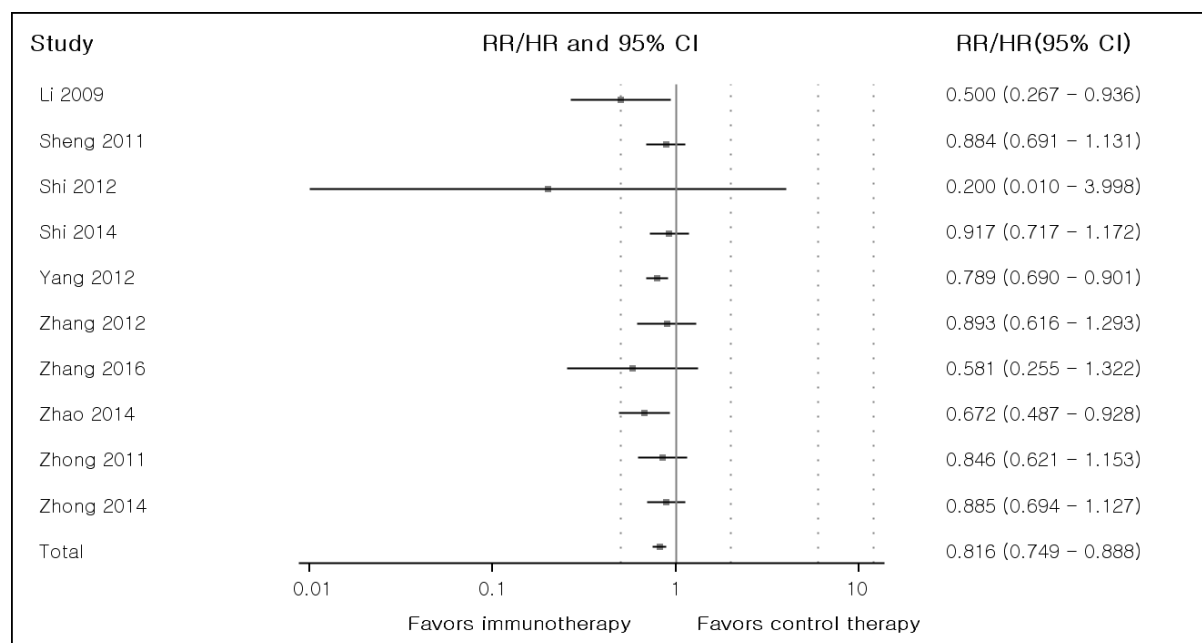

**Figure S7.** Treatment with DC/CIK on Non-Small Cell Lung Cancer (NSCLC), OS

34. Li H, Wang C, Yu J, et al. Dendritic cell-activated cytokine-induced killer cells enhance the anti-tumor effect of chemotherapy on non-small cell lung cancer in patients after surgery. *Cytotherapy*. 2009;11(8):1076-1083. doi:10.3109/14653240903121252
35. Sheng C, Bao F, Xu S. Clinical research on chemotherapy combined with dendritic cell-cytokine killer cells for non-small cell lung cancer. *J Pr Oncol*. 2011;26(5):503-506.
36. Shi S Bin, Ma TH, Li CH, Tang XY. Effect of maintenance therapy with dendritic cells: cytokine-induced killer cells in patients with advanced non-small cell lung cancer. *Tumori*. 98(3):314-319. doi:10.1700/1125.12398
37. Shi S-B, Tang X-Y, Tian J, Chang C-X, Li P, Qi J-L. Efficacy of erlotinib plus dendritic cells and cytokine-induced killer cells in maintenance therapy of advanced non-small cell lung cancer. *J Immunother*. 2014;37(4):250-255. doi:10.1097/CJI.0000000000000015
38. Wu C, Jiang J, Shi L, Xu N. Prospective study of chemotherapy in combination with cytokine-induced killer cells in patients suffering from advanced non-small cell lung cancer. *Anticancer Res*. 28(6B):3997-4002. <http://www.ncbi.nlm.nih.gov/pubmed/19192663>. Accessed May 29, 2018.
39. Yang L, Ren B, Li H, et al. Enhanced antitumor effects of DC-activated CIKs to chemotherapy treatment in a single cohort of advanced non-small-cell lung cancer patients. *Cancer Immunol Immunother*. 2013;62(1):65-73. doi:10.1007/s00262-012-1311-8
40. Zhang J, Geng J, Han Z. Clinical effects of treatment of dendritic cells combined with cytokine induced killer cells therapy in patients with advanced colon carcinoma. *Acta Acad Med Xuzhou*. 2011;31(7):457-459.
41. Zhang J, Mao G, Han Y, et al. The clinical effects of DC-CIK cells combined with chemotherapy in the treatment of advanced NSCLC. *Chinese-German J Clin Oncol*. 2012;11(2):67-71. doi:DOI 10.1007/s10330-011-0929-x

42. Zhao M, Li H, Li L, Zhang Y. Effects of a gemcitabine plus platinum regimen combined with a dendritic cell-cytokine induced killer immunotherapy on recurrence and survival rate of non-small cell lung cancer patients. *Exp Ther Med.* 2014;7(5):1403-1407. doi:10.3892/etm.2014.1574
43. Zhong R, Teng J, Han B. Dendritic cells combining with cytokine-induced killer cells synergize chemotherapy in patients with late-stage non-small cell lung cancer. *Cancer Immunol Immun.* 2011;60(10):1497-1502.

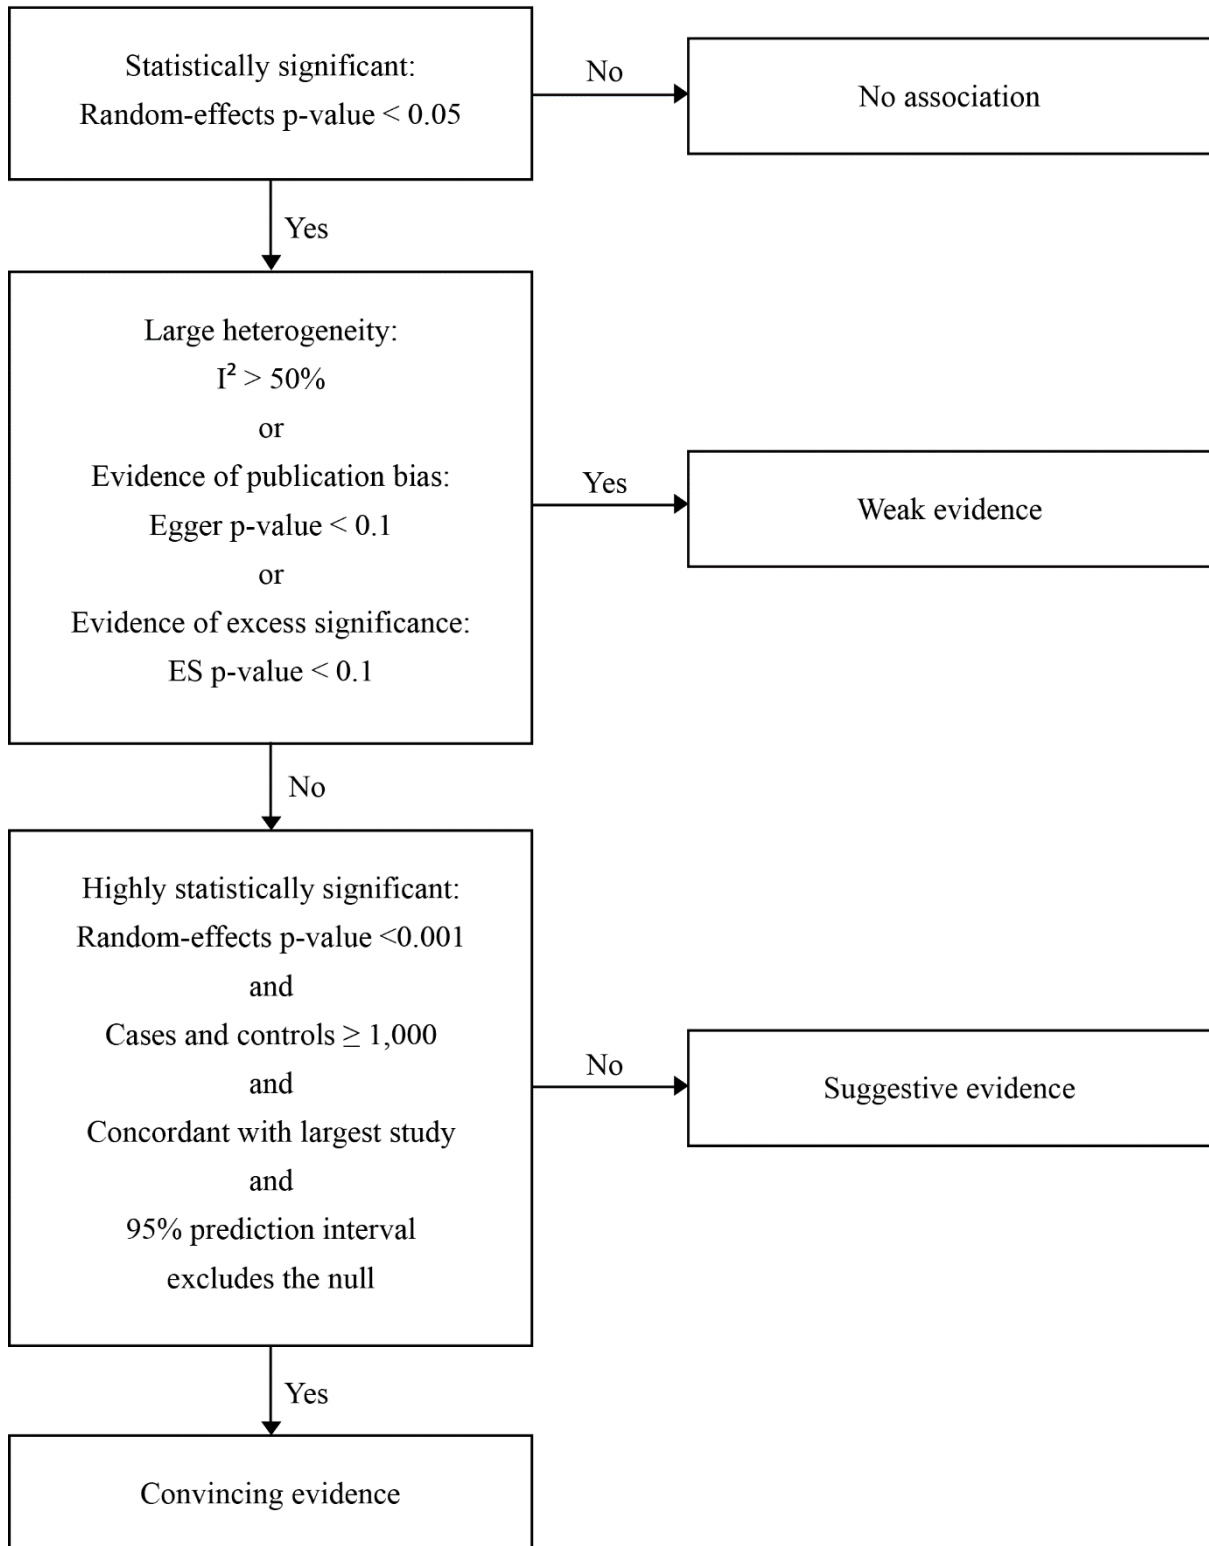

Figure S8. Level of evidence algorithm

\*When a meta-analysis had no evidence of publication bias or ES but had high in-between study heterogeneity ( $I^2 > 50$ ), we rechecked the results of its component studies to find out whether high heterogeneity was due to the differences in the direction of effects or due to the differences in the size of the associations. When the number of statistically significant component studies was the same or greater than the number of studies which were not significant or significant in the opposite direction, the comparison was classified as suggestive evidence, or convincing evidence if further criteria were met.

\*When no statistically significant component study was observed in a meta-analysis, the comparison was at best classified as weak evidence, even in the absence of biases.



**Table S1.** Descriptive statistics of meta-analyses according to immunotherapy category.

| Statistics                     | Immunotherapy category      | Number of articles | Number of meta-analyses | Individual component studies |          | Cases plus controls |                |            | Random effects <i>p</i> -Value |                |                | Heterogeneity   |                 | Publication bias |                      | Cases plus controls |                 | Concordance with largest study |                | Excess significance |                 | 95% prediction interval |                  | Level of evidence       |              |                |                |                 |   |
|--------------------------------|-----------------------------|--------------------|-------------------------|------------------------------|----------|---------------------|----------------|------------|--------------------------------|----------------|----------------|-----------------|-----------------|------------------|----------------------|---------------------|-----------------|--------------------------------|----------------|---------------------|-----------------|-------------------------|------------------|-------------------------|--------------|----------------|----------------|-----------------|---|
|                                |                             |                    |                         | N.                           | Median   | IQR                 | N.             | Median     | IQR†                           | <0.001         | <0.05          | >0.05           | Low or moderate | Large            | No evidence detected | Evidence detected   | >= 1000         | <1000                          | Concordant     | Not concordant      | No evidence     | Evidence detected or NA | Exclude the null | Included the null or NA | Convincing   | Suggestive     | Weak           | No association  |   |
| mAB                            | Anti-PD-1/PD-L1             | 6                  | 29                      | 129                          | 3        | 2-6                 | 61,006         | 1,542      | 1,141-3,196                    | 17(59%)        | 5(17%)         | 7(24%)          | 14(48%)         | 15(52%)          | 19(66%)              | 10(34%)             | 24(83%)         | 5(17%)                         | 21(72%)        | 8(28%)              | 23(79%)         | 6(21%)                  | 4(14%)           | 25(86%)                 | 3(10%)       | 11(38%)        | 8(28%)         | 7(24%)          |   |
|                                | Anti-CD20                   | 9                  | 28                      | 155                          | 4        | 3-7                 | 45,573         | 1,421      | 488-1,936                      | 16(57%)        | 6(21%)         | 6(21%)          | 17(61%)         | 11(39%)          | 22(79%)              | 6(21%)              | 19(68%)         | 9(32%)                         | 13(46%)        | 15(54%)             | 22(79%)         | 6(21%)                  | 5(18%)           | 23(82%)                 | 3(11%)       | 11(39%)        | 8(29%)         | 6(21%)          |   |
| ACI                            | DC/CIK                      | 6                  | 34                      | 125                          | 4        | 2-5                 | 9,737          | 282        | 174-371                        | 5(15%)         | 20(59%)        | 9(26%)          | 33(97%)         | 1(3%)            | 22(65%)              | 12(35%)             | 0(0%)           | 34(100%)                       | 11(32%)        | 23(68%)             | 31(91%)         | 3(9%)                   | 5(15%)           | 29(85%)                 | 0(0%)        | 13(38%)        | 12(35%)        | 9(26%)          |   |
|                                | CIK                         | 3                  | 14                      | 60                           | 4        | 3-5                 | 9,199          | 639.5      | 552-766                        | 5(36%)         | 5(36%)         | 4(29%)          | 12(86%)         | 2(14%)           | 12(86%)              | 2(14%)              | 0(0%)           | 14(100%)                       | 8(57%)         | 6(43%)              | 14(100%)        | 0(0%)                   | 0(0%)            | 14(100%)                | 0(0%)        | 7(50%)         | 3(21%)         | 4(29%)          |   |
|                                | Others or not specified     | 6                  | 30                      | 153                          | 4        | 2.75-6              | 15,581         | 371        | 261-769                        | 6(20%)         | 15(50%)        | 9(30%)          | 27(90%)         | 3(10%)           | 21(70%)              | 9(30%)              | 3(10%)          | 27(90%)                        | 8(27%)         | 22(73%)             | 27(90%)         | 3(10%)                  | 8(27%)           | 22(73%)                 | 1(3%)        | 13(43%)        | 7(23%)         | 9(30%)          |   |
| Cytokine                       | IFN-α                       | 15                 | 44                      | 367                          | 8        | 5.25-11.75          | 90,619         | 1,254      | 948-1,661                      | 14(32%)        | 9(20%)         | 21(48%)         | 39(89%)         | 5(11%)           | 30(68%)              | 14(32%)             | 29(66%)         | 15(34%)                        | 10(23%)        | 34(77%)             | 41(93%)         | 3(7%)                   | 13(30%)          | 31(70%)                 | 2(5%)        | 10(23%)        | 11(25%)        | 21(48%)         |   |
|                                | IL-2                        | 7                  | 19                      | 101                          | 6        | 4-7                 | 17,549         | 903        | 679-1,206                      | 4(21%)         | 2(11%)         | 13(68%)         | 19(100%)        | 0(0%)            | 15(79%)              | 4(21%)              | 9(47%)          | 10(53%)                        | 2(11%)         | 17(89%)             | 15(79%)         | 4(21%)                  | 4(21%)           | 15(79%)                 | 0(0%)        | 3(16%)         | 3(16%)         | 13(68%)         |   |
|                                | Others or not specified     | 3                  | 8                       | 30                           | 4        | 2.25-5              | 7,075          | 1,007      | 380-1,224                      | 0(0%)          | 0(0%)          | 8(100%)         | 7(88%)          | 1(13%)           | 6(75%)               | 2(25%)              | 4(50%)          | 4(50%)                         | 0(0%)          | 8(100%)             | 3(38%)          | 5(63%)                  | 0(0%)            | 8(100%)                 | 0(0%)        | 0(0%)          | 0(0%)          | 8(100%)         |   |
| Vaccine                        | DC                          | 2                  | 5                       | 14                           | 3        | 2.5-3               | 1,694          | 86         | 67-737                         | 1(20%)         | 1(20%)         | 3(60%)          | 5(100%)         | 0(0%)            | 3(60%)               | 2(40%)              | 0(0%)           | 5(100%)                        | 1(20%)         | 4(80%)              | 4(80%)          | 1(20%)                  | 0(0%)            | 5(100%)                 | 0(0%)        | 1(20%)         | 1(20%)         | 3(60%)          |   |
|                                | Others or not specified     | 7                  | 14                      | 46                           | 2.5      | 2-4.25              | 18,324         | 1,071      | 848-1,756                      | 1(7%)          | 5(36%)         | 8(57%)          | 9(64%)          | 5(36%)           | 5(36%)               | 9(64%)              | 9(64%)          | 5(36%)                         | 2(14%)         | 12(86%)             | 11(79%)         | 3(21%)                  | 1(7%)            | 13(93%)                 | 0(0%)        | 2(14%)         | 4(29%)         | 8(57%)          |   |
|                                | Uncategorized immunotherapy | 7                  | 22                      | 126                          | 5        | 3-9                 | 48,499         | 2,342      | 1,066-2,736                    | 2(9%)          | 7(32%)         | 13(59%)         | 13(59%)         | 9(41%)           | 15(68%)              | 7(32%)              | 17(77%)         | 5(23%)                         | 5(23%)         | 17(77%)             | 10(45%)         | 12(55%)                 | 3(14%)           | 19(86%)                 | 0(0%)        | 4(18%)         | 5(23%)         | 13(59%)         |   |
| <b>Analyses of RCTs TOTAL</b>  |                             | <b>63</b>          | <b>247</b>              | <b>1,306</b>                 | <b>4</b> | <b>3-7</b>          | <b>324,856</b> | <b>885</b> | <b>410-1,542</b>               | <b>71(29%)</b> | <b>75(30%)</b> | <b>101(41%)</b> | <b>195(79%)</b> | <b>52(21%)</b>   | <b>170(69%)</b>      | <b>77(31%)</b>      | <b>114(46%)</b> | <b>133(54%)</b>                | <b>81(33%)</b> | <b>166(67%)</b>     | <b>201(81%)</b> | <b>46(19%)</b>          | <b>43(17%)</b>   | <b>204(83%)</b>         | <b>9(4%)</b> | <b>75(30%)</b> | <b>62(25%)</b> | <b>101(41%)</b> |   |
| Analyses of RCTs plus non-RCTs |                             | 6                  | 35                      | 288                          | -        | -                   | 34,326         | -          | -                              | -              | -              | -               | -               | -                | -                    | -                   | -               | -                              | -              | -                   | -               | -                       | -                | -                       | -            | -              | -              | -               | - |

Abbreviations: *N.*, number; IQR, interquartile range; NA, not available; mAB, monoclonal antibody; ACI, adoptive cell immunotherapy; DC/CIK, dendritic cells with cytokine-induced killer cells; CIK, cytokine-induced killer cells; IFN-α, interferon alpha; IL-2, interleukin-2; DC, dendritic cells; IT, immunotherapy; RCT, randomized controlled trials. \* 4 results from one article showed weak evidence in favor of the control therapy. † Value is rounded to the nearest unit.

**Table S2.** Umbrella review summary and level of evidence reported in meta-analyses of cancer therapeutic anti-PD-1/PD-L1 monoclonal antibodies.

| Author, year     | Comparison             | Cancer type       | RC T N. | Interven - tion/control | Outcome          | Me - trics | M *<br>Reported <i>p</i> -Value * | Reported SE (95% CI) * | Reported I2 (%) (p-Value) * | R/N/S †     | F <i>p</i> -Value § | F SE (95% CI) § | R <i>p</i> -Value § | R SE (95% CI) § | C ‡             | I2 (%) (p-Value) § | 95% Prediction Interval | Egger <i>p</i> -Value | Exces s Signif - icance | Level of Evidence |            |
|------------------|------------------------|-------------------|---------|-------------------------|------------------|------------|-----------------------------------|------------------------|-----------------------------|-------------|---------------------|-----------------|---------------------|-----------------|-----------------|--------------------|-------------------------|-----------------------|-------------------------|-------------------|------------|
| Guan et al. 2016 | Anti-PD-1/PD-L1 vs CTx | Advanced melanoma | 3(4)    | 843/699                 | PFS              | HR         | F                                 | <0.001                 | 0.50(0.44-0.58)             | 16.9(0.307) | 0/1/3               | <0.001          | 0.50(0.44-0.58)     | <0.001          | 0.50(0.43-0.59) | Y                  | 17.91(0.301)            | (0.32-0.80)           | <b>0.24</b>             | <i>p</i> > 0.1    | Convincing |
|                  |                        |                   | 3(4)    | 843/699                 | Overall response | RR         | F                                 | <0.001                 | 3.42(2.49-4.69)             | 0.0(0.502)  | 0/0/4               | <0.001          | 3.23(2.37-4.41)     | <0.001          | 3.23(2.37-4.41) | Y                  | 0(0.526)                | (1.64-6.39)           | <b>0.19</b>             | <i>p</i> > 0.1    | Convincing |

| Author, year                      | Comparison                             | Cancer type                                  | RC T N. | Interven - tion /control | Outcome            | Me t- rics | M * p-Value | Reporte d SE (95% CI) * | Reported I2(%) (p-Value) * | R/N/S †        | F p-Value § | F SE (95% CI) § | R p-Value §     | R SE (95% CI) § | C ‡             | I2(%) (p-Value) § | 95% Prediction Interval | Egger p-Value | Exces s Signif i- cance | Level of Evidence |                |
|-----------------------------------|----------------------------------------|----------------------------------------------|---------|--------------------------|--------------------|------------|-------------|-------------------------|----------------------------|----------------|-------------|-----------------|-----------------|-----------------|-----------------|-------------------|-------------------------|---------------|-------------------------|-------------------|----------------|
| Hao et al. 2017                   | Nivolumab vs ipilimumab                | Metastatic advanced melanoma                 | 2       | 871/593                  | 1-year OS          | RR         | R           | NA                      | 1.37(1.03-1.74)            | 85.8(0.008)    | 0/0/2       | <0.001          | 1.35(1.24-1.48) | 0.008           | 1.37(1.09-1.73) | Y                 | 85.24(0.009)            | -             | -                       | NA                | Weak           |
|                                   |                                        |                                              | 2       | 871/593                  | PFS                | HR         | F           | NA                      | 0.58(0.48-0.69)            | 0(0.925)       | 0/0/2       | <0.001          | 0.58(0.48-0.69) | <0.001          | 0.58(0.48-0.69) | Y                 | 0(0.925)                | -             | -                       | p > 0.1           | Weak           |
|                                   |                                        |                                              | 2       | 871/593                  | Objective response | RR         | F           | NA                      | 2.51(2.03-3.09)            | 0(0.352)       | 0/0/2       | <0.001          | 2.46(2.00-3.03) | <0.001          | 2.46(2.00-3.03) | Y                 | 0(0.358)                | -             | -                       | NA                | Weak           |
|                                   | Nivolumab + ipilimumab vs ipilimumab   | Metastatic advanced melanoma                 | 2       | 410/362                  | 1-year OS          | RR         | R           | NA                      | 1.54(0.90-2.63)            | 93.5(0.000)    | 0/1/1       | <0.001          | 1.80(1.61-2.00) | 0.122           | 1.53(0.89-2.64) | N                 | 93.47 (< 0.001)         | -             | -                       | NA                | No association |
|                                   |                                        |                                              | 2       | 410/362                  | PFS                | HR         | F           | NA                      | 0.40(0.31-0.52)            | 0(0.588)       | 0/0/2       | <0.001          | 0.40(0.31-0.52) | <0.001          | 0.40(0.31-0.52) | Y                 | 0(0.585)                | -             | -                       | NA                | Weak           |
|                                   |                                        |                                              | 2       | 410/362                  | Objective response | RR         | F           | NA                      | 3.28(2.58-4.17)            | 47(0.170)      | 0/0/2       | <0.001          | 3.17(2.51-4.01) | <0.001          | 3.56(2.11-6.00) | Y                 | 44.72(0.179)            | -             | -                       | NA                | Weak           |
| Nivolumab or pembrolizumab vs CTx | Metastatic advanced melanoma           | 3                                            | 843/520 | PFS                      | HR                 | F          | NA          | 0.43(0.37-0.50)         | 0(0.384)                   | 0/1/2          | <0.001      | 0.43(0.37-0.50) | <0.001          | 0.43(0.37-0.50) | Y               | 0(0.384)          | (0.16-1.14)             | <b>0.09</b>   | NA                      | Weak              |                |
|                                   |                                        | 3                                            | 843/520 | Objective response       | RR                 | F          | NA          | 3.43(2.57-4.58)         | 11(0.325)                  | 0/0/3          | <0.001      | 3.28(2.47-4.35) | <0.001          | 3.30(2.45-4.45) | Y               | 7.06(0.341)       | (0.38-28.39)            | <b>0.23</b>   | NA                      | Suggestive        |                |
| Wang et al. 2017                  | Anti-PD-1/PD-L1 vs CT                  | Melanoma                                     | 6       | 1198/974                 | Objective response | RR         | F           | <0.00001                | 2.80(2.37-3.30)            | 71(0.004)      | 0/0/6       | <0.001          | 2.67(2.27-3.15) | <0.001          | 2.89(2.03-4.11) | Y                 | 70.36 (< 0.001)         | (0.98-8.52)   | <b>0.51</b>             | p > 0.1           | Suggestive     |
|                                   |                                        |                                              | 6       | 1198/974                 | DCR                | RR         | R           | 0.32                    | 1.23(0.82-1.84)            | 96 (< 0.00001) | 3/1/2       | 0.015           | 1.10(1.02-1.19) | 0.270           | 1.23(0.85-1.76) | N                 | 95.09 (< 0.001)         | (0.33-4.59)   | <b>0.43</b>             | p > 0.1           | No association |
| Yun et al. 2016                   | Anti-PD-1 or anti-CTLA-4 vs CTx or VAX | Metastatic, unresectable, cutaneous melanoma | 4       | 1328/923                 | OS                 | RR         | R           | 0.001                   | 0.72(0.59-0.88)            | 84(0.0004)     | 0/0/4       | <0.001          | 0.76(0.71-0.82) | 0.001           | 0.72(0.60-0.88) | Y                 | 83.34 (< 0.001)         | (0.30-1.75)   | <b>0.25</b>             | p > 0.1           | Suggestive     |
|                                   |                                        |                                              | 6       | 1961/1235                | PFS                | RR         | R           | 0.0004                  | 0.84(0.76-0.93)            | 85 (< 0.00001) | 0/2/4       | <0.001          | 0.88(0.85-0.91) | <0.001          | 0.84(0.77-0.92) | Y                 | 83.96 (< 0.001)         | (0.61-1.16)   | <b>0.17</b>             | p > 0.1           | Suggestive     |
|                                   |                                        |                                              | 6       | 1961/1235                | Objective response | RR         | R           | 0.005                   | 0.85(0.76-0.95)            | 89 (< 0.00001) | 0/2/4       | <0.001          | 0.89(0.86-0.92) | 0.004           | 0.85(0.76-0.95) | N                 | 88.49 (< 0.001)         | (0.57-1.25)   | <b>0.31</b>             | p > 0.1           | Suggestive     |
| <b>Non-small cell lung cancer</b> |                                        |                                              |         |                          |                    |            |             |                         |                            |                |             |                 |                 |                 |                 |                   |                         |               |                         |                   |                |
| Wang et al. 2017                  | Anti-PD-1/PD-L1 vs CT                  | NSCLC                                        | 2       | 427/427                  | Objective response | RR         | F           | 0.001                   | 1.73(1.24-2.40)            | 6(0.30)        | 0/0/2       | 0.001           | 1.72(1.23-2.39) | 0.002           | 1.72(1.22-2.43) | Y                 | 5.37(0.304)             | -             | -                       | p > 0.1           | Weak           |
|                                   |                                        |                                              | 2       | 427/427                  | DCR                | RR         | R           | 0.75                    | 0.95(0.69-1.31)            | 77(0.04)       | 0/1/1       | 0.136           | 0.90(0.78-1.03) | 0.745           | 0.95(0.69-1.31) | N                 | 77.29(0.036)            | -             | -                       | p > 0.1           | No association |
| Zhou et al. 2016                  | Anti-PD-1/PD-L1 vs CTx                 | Pretreated advanced NSCLC                    | 3       | 571/570                  | OS                 | HR         | F           | <0.001                  | 0.71(0.61-0.81)            | 1.9(0.361)     | 0/1/2       | <0.001          | 0.71(0.61-0.81) | <0.001          | 0.71(0.61-0.82) | Y                 | 1.89(0.361)             | (0.27-1.86)   | <b>0.72</b>             | p > 0.1           | Suggestive     |
|                                   |                                        |                                              | 3       | 571/570                  | PFS                | HR         | R           | 0.134                   | 0.83(0.65-1.06)            | 71.3(0.031)    | 0/2/1       | 0.016           | 0.86(0.75-0.97) | 0.134           | 0.83(0.65-1.06) | N                 | 71.27(0.031)            | (0.05-13.46)  | <b>0.44</b>             | NA                | No association |
|                                   |                                        |                                              | 3       | 571/570                  | Overall response   | OR         | F           | 0.015                   | 1.50(1.08-2.07)            | 32.1(0.229)    | 0/2/1       | 0.018           | 1.48(1.07-2.05) | 0.059           | 1.49(0.99-2.24) | N                 | 32.77(0.226)            | (0.03-64.77)  | <b>0.92</b>             | NA                | No association |
| Zhuansun et al. 2017              | Anti-PD-1/PD-L1 vs CTx                 | Pretreated advanced NSCLC                    | 4       | 1261/913                 | OS                 | HR         | F           | <0.00001                | 0.67(0.61-0.75)            | 0(0.63)        | 0/1/3       | <0.001          | 0.68(0.61-0.75) | <0.001          | 0.68(0.61-0.75) | Y                 | 0(0.648)                | (0.53-0.86)   | <b>0.99</b>             | p > 0.1           | Convincing     |
|                                   |                                        |                                              | 4       | 1261/913                 | PFS                | HR         | R           | 0.009                   | 0.81(0.70-0.95)            | 57(0.07)       | 0/2/2       | <0.001          | 0.82(0.74-0.90) | 0.009           | 0.81(0.70-0.95) | Y                 | 56.84(0.073)            | (0.45-1.49)   | <b>0.89</b>             | p > 0.1           | Suggestive     |
|                                   |                                        |                                              | 4       | 1261/913                 | Objective response | RR         | F           | <0.00001                | 0.92(0.89-0.95)            | 34(0.21)       | 0/1/3       | <0.001          | 0.92(0.88-0.95) | <0.001          | 0.92(0.88-0.96) | Y                 | 33.48(0.211)            | (0.79-1.07)   | <b>0.58</b>             | p > 0.1           | Suggestive     |
| <b>Solid tumor</b>                |                                        |                                              |         |                          |                    |            |             |                         |                            |                |             |                 |                 |                 |                 |                   |                         |               |                         |                   |                |

| Author, year                           | Comparison            | Cancer type                                                                                                                     | RC T N. | Interven - tion /control | Outcome                  | Me t- rics | M *<br>p-Value | Reporte d SE (95% CI) * | Reported I2(%) (p-Value) * | R/N/S †       | F p- Value § | F SE (95% CI) § | R p- Value §    | R SE (95% CI) § | C ‡             | I2(%) § (p-Value) | 95% Prediction Interval | Egger p- Value | Exces s Signif i- cance | Level of Evidence |                |
|----------------------------------------|-----------------------|---------------------------------------------------------------------------------------------------------------------------------|---------|--------------------------|--------------------------|------------|----------------|-------------------------|----------------------------|---------------|--------------|-----------------|-----------------|-----------------|-----------------|-------------------|-------------------------|----------------|-------------------------|-------------------|----------------|
| Wang et al. 2017                       | Anti-PD-1/PD-L1 vs CT | Melanoma or NSCLC or RCC                                                                                                        | 6       | 1747/1467                | OS                       | HR         | R              | <0.001                  | 0.69(0.62-0.76)            | 0.0(0.634)    | 0/0/6        | <0.001          | 0.69(0.62-0.76) | <0.001          | 0.69(0.62-0.76) | Y                 | 0(0.633)                | (0.59-0.80)    | <b>0.08</b>             | p > 0.1           | Weak           |
|                                        |                       |                                                                                                                                 | 10      | 3105/2141                | PFS                      | HR         | R              | <0.001                  | 0.65(0.53-0.79)            | 81.2(0.000)   | 0/4/6        | <0.001          | 0.70(0.65-0.76) | <0.001          | 0.65(0.53-0.79) | Y                 | 81.4 (<0.001)           | (0.33-1.26)    | <b>0.23</b>             | p > 0.1           | Suggestive     |
|                                        |                       |                                                                                                                                 | 9       | 2035/1812                | Objective response       | RR         | F              | <0.00001                | 2.92(2.55-3.36)            | 81 (<0.00001) | 0/0/9        | <0.001          | 2.71(2.36-3.12) | <0.001          | 2.92(2.07-4.12) | Y                 | 80.46 (<0.001)          | (0.93-9.19)    | <b>0.55</b>             | p > 0.1           | Suggestive     |
|                                        |                       |                                                                                                                                 | 9       | 2035/1812                | DCR                      | RR         | R              | 0.25                    | 1.15(0.91-1.45)            | 94(0.00001)   | 4/2/3        | 0.011           | 1.08(1.02-1.14) | 0.233           | 1.15(0.92-1.43) | N                 | 92.98 (<0.001)          | (0.51-2.58)    | <b>0.52</b>             | p > 0.1           | No association |
|                                        |                       |                                                                                                                                 | 9       | 2035/1812                | Stable disease rate      | RR         | F              | <0.00001                | 0.60(0.55-0.67)            | 81 (<0.00001) | 0/4/5        | <0.001          | 0.61(0.55-0.67) | <0.001          | 0.58(0.45-0.75) | Y                 | 81.01 (<0.001)          | (0.24-1.36)    | <b>0.59</b>             | p > 0.1           | Suggestive     |
|                                        |                       |                                                                                                                                 | 9       | 2035/1812                | Progressive disease rate | RR         | F              | <0.00001                | 0.80(0.74-0.87)            | 95 (<0.00001) | 2/2/5        | <0.001          | 0.77(0.71-0.83) | 0.131           | 0.76(0.53-1.09) | N                 | 94.79 (<0.001)          | (0.20-2.82)    | <b>0.99</b>             | p > 0.1           | No association |
| <b>Anti-PD-1/PD-L1 solid tumor OS</b>  | Anti-PD-1/PD-L1 vs CT | Gastric or gastro-esophageal junction cancer or head-and-neck squamous cell carcinoma or melanoma or NSCLC or RCC or urothelial | 16      | 4681/3582                | OS                       | HR         | -              | -                       | -                          | 0/3/13        | <0.001       | 0.73(0.69-0.78) | <0.001          | 0.73(0.68-0.79) | Y               | 38.83(0.057)      | (0.59-0.92)             | <b>0.72</b>    | p > 0.1                 | Convincing        |                |
| <b>Anti-PD-1/PD-L1 solid tumor PFS</b> | Anti-PD-1/PD-L1 vs CT | Gastric or gastro-esophageal junction cancer or head-and-neck squamous cell carcinoma or melanoma or NSCLC or RCC or urothelial | 18 (19) | 5672/4076                | PFS                      | HR         | -              | -                       | -                          | 0/9/10        | <0.001       | 0.76(0.72-0.79) | <0.001          | 0.73(0.65-0.84) | Y               | 86.79 (<0.001)    | (0.41-1.30)             | <b>0.25</b>    | p > 0.1                 | Suggestive        |                |

Abbreviations; RCT, randomized controlled trial; N., number; SE, standard effect; CI, confidence interval; M, model; F, fixed effect; R, random effect; NA, not available; C, concordance with largest study; Y, concordant with largest study; N, not concordant with largest study; OS, overall survival; PFS progression-free survival; DCR, disease control rate; RR, risk ratio; HR, hazard ratio; OR, odds ratio; CTx, chemotherapy; CT, conventional therapy; VAX, vaccine; NSCLC, Non-small cell lung cancer; RCC, renal cell carcinoma. \* Value reported in original article of the meta-analysis. † Number of individual studies of effect size with statistically significant in reverse direction/not statistically significant/statistically significant. ‡ Concordance of fixed and random effects summary outcome with outcome of largest individual study. § Value obtained from re-analysis of original meta-analysis. All p-Values are two-sided.

**Table S3.** Umbrella review summary and level of evidence reported in meta-analyses of cancer therapeutic anti-CD20 monoclonal antibodies.

| Author, year                        | Comparison             | Cancer type                  | RC T N. | Interven - tion /control | Outcome          | Me t- rics | M *<br>p-Value | Reporte d SE (95% CI) * | Reported I2(%) (p-value) * | R/N/S †    | F p- Value § | F SE (95% CI) § | R p- Value §    | R SE (95% CI) § | C ‡             | I2(%) § (p-Value) | 95% Prediction Interval | Egger p- Value | Exces s Signif i- cance | Level of Evidence |                |
|-------------------------------------|------------------------|------------------------------|---------|--------------------------|------------------|------------|----------------|-------------------------|----------------------------|------------|--------------|-----------------|-----------------|-----------------|-----------------|-------------------|-------------------------|----------------|-------------------------|-------------------|----------------|
| <b>Chronic Lymphocytic Leukemia</b> |                        |                              |         |                          |                  |            |                |                         |                            |            |              |                 |                 |                 |                 |                   |                         |                |                         |                   |                |
| Bauer et al 2012                    | Rituximab + CTx vs CTx | Chronic lymphocytic leukemia | 3       | 710/711                  | OS               | HR         | F              | 0.033                   | 0.78(0.62-0.98)            | 22(0.28)   | 0/2/1        | 0.035           | 0.78(0.62-0.98) | 0.090           | 0.79(0.61-1.04) | N                 | 20.99(0.282)            | (0.08-7.51)    | <b>0.36</b>             | NA                | No association |
|                                     |                        |                              | 3       | 710/711                  | PFS              | HR         | F              | <0.00001                | 0.64(0.55-0.74)            | 49% (0.14) | 0/1/2        | <0.001          | 0.64(0.55-0.74) | <0.001          | 0.65(0.52-0.83) | Y                 | 49.88(0.136)            | (0.06-7.00)    | <b>0.75</b>             | p > 0.1           | Suggestive     |
|                                     |                        |                              | 3       | 710/711                  | Overall response | RR         | F              | <0.00001                | 1.16(1.09-1.23)            | 0(0.41)    | 0/1/2        | <0.001          | 1.14(1.08-1.20) | <0.001          | 1.14(1.08-1.20) | Y                 | 0(0.499)                | (0.81-1.61)    | <b>0.63</b>             | p > 0.1           | Suggestive     |

| Author, year                  | Comparison                                                | Cancer type                      | RC T N. | Interven - tion /control | Outcome             | Me t- rics | M * p-Value | Reporte d SE (95% CI) * | Reported I2(%) (p-value) * | R/N/S †         | F p- Value § | F SE (95% CI) § | R p- Value §    | R SE (95% CI) § | C ‡             | I2(%) (p-Value) § | 95% Prediction Interval | Egger p- Value | Exces s Signif i- cance | Level of Evidence |                |
|-------------------------------|-----------------------------------------------------------|----------------------------------|---------|--------------------------|---------------------|------------|-------------|-------------------------|----------------------------|-----------------|--------------|-----------------|-----------------|-----------------|-----------------|-------------------|-------------------------|----------------|-------------------------|-------------------|----------------|
| Nunes et al. 2015             | Rituximab + CTx vs CTx                                    | Chronic lymphocytic leukemia     | 3       | 710/711                  | Complete response   | RR         | F           | <0.00001                | 2.11(1.72-2.59)            | 0(0.59)         | 0/1/2        | <0.001          | 2.11(1.72-2.59) | <0.001          | 2.11(1.72-2.59) | Y                 | 0(0.592)                | (0.56-8.00)    | <b>0.60</b>             | p > 0.1           | Suggestive     |
|                               |                                                           |                                  | 4       | 1231/1202                | Complete remission  | OR         | F           | NA                      | 2.58(2.13-3.13)            | 0(0.468)        | 0/1/3        | <0.001          | 2.59(2.14-3.14) | <0.001          | 2.59(2.14-3.14) | Y                 | 0(0.648)                | (1.70-3.96)    | <b>0.13</b>             | p > 0.1           | Convincing     |
| <b>Non-Hodgkin's lymphoma</b> |                                                           |                                  |         |                          |                     |            |             |                         |                            |                 |              |                 |                 |                 |                 |                   |                         |                |                         |                   |                |
| Gao et al. 2010               | Rituximab + CTx vs CTx                                    | B-cell non-Hodgkin's lymphoma    | 11      | 2486/2447                | OS                  | RR         | F           | <0.00001                | 1.09(1.06-1.12)            | 28.3(0.18)      | 0/6/5        | <0.001          | 1.08(1.05-1.10) | <0.001          | 1.08(1.05-1.11) | Y                 | 20.08(0.252)            | (1.02-1.14)    | <b>0.28</b>             | p > 0.1           | Convincing     |
|                               |                                                           |                                  | 11      | 2087/2054                | Overall response    | RR         | F           | <0.00001                | 1.17(1.10-1.25)            | 72.1 (<0.0001)  | 0/4/7        | <0.001          | 1.12(1.08-1.15) | <0.001          | 1.17(1.10-1.24) | N                 | 70.52(0)                | (0.96-1.42)    | <b>0.01</b>             | p > 0.1           | Weak           |
|                               |                                                           |                                  | 11      | 2175/2125                | Complete response   | RR         | F           | <0.00001                | 1.52(1.27-1.82)            | 84.8 (<0.00001) | 0/3/8        | <0.001          | 1.21(1.15-1.27) | <0.001          | 1.50(1.27-1.78) | Y                 | 82.04(0)                | (0.89-2.53)    | <b>0.01</b>             | p > 0.1           | Weak           |
|                               |                                                           |                                  | 11      | 2470/2333                | DCR                 | RR         | F           | <0.00001                | 1.36(1.26-1.46)            | 52.1(0.02)      | 0/4/7        | <0.001          | 1.33(1.27-1.39) | <0.001          | 1.36(1.26-1.46) | Y                 | 51.36(0.024)            | (1.11-1.67)    | <b>0.21</b>             | p > 0.1           | Convincing     |
| Hou et al. 2011               | Rituximab + CTx vs CTx                                    | B-cell non-Hodgkin's lymphoma    | 7       | 178/179                  | Complete response   | OR         | F           | <0.00001                | 3.02(1.94-4.72)            | 0(0.54)         | 0/5/2        | <0.001          | 2.99(1.90-4.71) | <0.001          | 2.99(1.90-4.71) | N                 | 0(0.538)                | (1.65-5.43)    | <b>0.54</b>             | p > 0.1           | Suggestive     |
| Ren et al. 2015               | Rituximab salvage therapy vs obs                          | Diffuse large B-Cell lymphoma    | 4       | 202/208                  | OS                  | HR         | F           | 0.02                    | 0.72(0.55-0.94)            | 57(0.07)        | 0/3/1        | 0.015           | 0.72(0.55-0.94) | 0.063           | 0.66(0.43-1.02) | N                 | 56.53(0.075)            | (0.12-3.65)    | <b>0.28</b>             | NA                | No association |
|                               |                                                           |                                  | 3       | 183/189                  | PFS                 | HR         | F           | <0.00001                | 0.61(0.52-0.72)            | 54(0.11)        | 0/2/1        | <0.001          | 0.61(0.52-0.72) | 0.094           | 0.72(0.49-1.06) | N                 | 54.46(0.111)            | (0.01-42.95)   | <b>0.15</b>             | NA                | No association |
|                               |                                                           |                                  | 4       | 202/208                  | Overall remission   | RR         | F           | 0.004                   | 1.26(1.07-1.47)            | 56(0.08)        | 0/3/1        | 0.009           | 1.23(1.05-1.43) | 0.185           | 1.19(0.92-1.53) | N                 | 55.07(0.083)            | (0.45-3.16)    | <b>0.71</b>             | p > 0.1           | No association |
| Schulz et al. 2007            | Rituximab + CTx vs CTx                                    | Follicular lymphoma              | 5       | 759/721                  | OS                  | HR         | F           | <0.001                  | 0.63(0.51-0.79)            | 0(0.59)         | 0/3/2        | 0.001           | 0.67(0.53-0.85) | 0.002           | 0.65(0.49-0.85) | N                 | 16.51(0.309)            | (0.35-1.20)    | <b>0.03</b>             | p > 0.1           | Weak           |
|                               |                                                           |                                  | 6       | 808/762                  | Overall response    | RR         | F           | <0.001                  | 1.19(1.13-1.24)            | 79.8(<0.001)    | 0/1/5        | <0.001          | 1.13(1.08-1.17) | <0.001          | 1.19(1.08-1.30) | Y                 | 72.79(0.003)            | (0.89-1.59)    | <b>0.09</b>             | p > 0.1           | Weak           |
|                               |                                                           |                                  | 7       | 994/949                  | OS                  | HR         | F           | <0.001                  | 0.65(0.54-0.78)            | 0(0.62)         | 0/4/3        | <0.001          | 0.71(0.59-0.85) | 0.001           | 0.70(0.57-0.87) | N                 | 18.86(0.286)            | (0.46-1.08)    | <b>0.82</b>             | p > 0.1           | Suggestive     |
|                               |                                                           | Indolent or mantle cell lymphoma | 7       | 979/935                  | Overall response    | RR         | F           | <0.001                  | 1.21(1.16-1.27)            | 81.3(<0.001)    | 0/1/6        | <0.001          | 1.14(1.10-1.19) | <0.001          | 1.21(1.10-1.32) | N                 | 74.34(0.001)            | (0.91-1.61)    | <b>0.05</b>             | p > 0.1           | Weak           |
|                               |                                                           |                                  | 7       | 979/935                  | Complete response   | RR         | F           | <0.001                  | 2.03(1.71-2.40)            | 84.1(<0.001)    | 0/2/5        | <0.001          | 1.74(1.48-2.06) | <0.001          | 2.13(1.39-3.26) | N                 | 82.71(0)                | (0.52-8.76)    | <b>0.09</b>             | p > 0.1           | Weak           |
|                               |                                                           | Mantle cell lymphoma             | 7       | 978/935                  | DCR                 | HR         | F           | <0.001                  | 0.62(0.55-0.71)            | 0(0.56)         | 0/1/6        | <0.001          | 0.72(0.66-0.79) | <0.001          | 0.70(0.59-0.84) | Y                 | 71.85(0.002)            | (0.40-1.24)    | <b>0.51</b>             | p > 0.1           | Suggestive     |
|                               |                                                           |                                  | 3       | 130/130                  | OS                  | HR         | F           | 0.04                    | 0.60(0.37-0.98)            | 61.6(0.07)      | 0/2/1        | 0.040           | 0.68(0.47-0.98) | 0.098           | 0.68(0.44-1.07) | N                 | 31.71(0.231)            | (0.01-40.91)   | <b>0.85</b>             | p > 0.1           | No association |
| Vidal et al. 2009             | Rituximab maintenance vs obs or treatment only at relapse | Follicular lymphoma              | 6       | 985 total                | OS                  | HR         | F           | 0.00028                 | 0.60(0.45-0.79)            | 13(0.33)        | 0/4/2        | <0.001          | 0.60(0.45-0.79) | <0.001          | 0.60(0.44-0.81) | Y                 | 13.07(0.331)            | (0.33-1.07)    | <b>0.30</b>             | p < 0.1¶          | Weak           |
|                               |                                                           |                                  | 3       | 454 total                | PFS                 | HR         | F           | <0.00001                | 0.53(0.45-1.17)            | 55(0.11)        | 0/1/2        | <0.001          | 0.53(0.42-0.66) | <0.001          | 0.54(0.38-0.76) | Y                 | 56.09(0.103)            | (0.01-21.69)   | <b>0.58</b>             | NA                | Weak           |
|                               |                                                           |                                  | 3       | 589 total                | Event-free survival | HR         | F           | <0.00001                | 0.46(0.37-0.57)            | 23(0.28)        | 0/0/3        | <0.001          | 0.46(0.37-0.57) | <0.001          | 0.46(0.35-0.59) | N                 | 22.82(0.274)            | (0.05-4.08)    | <b>0.97</b>             | p > 0.1           | Suggestive     |
| Vidal et al. 2017             | Rituximab maintenance vs obs or treatment only at relapse | Follicular lymphoma              | 9       | 1145/1170                | OS                  | HR         | F           | 0.007                   | 0.79(0.66-0.94)            | 0(0.94)         | 0/8/1        | 0.007           | 0.79(0.66-0.94) | 0.007           | 0.79(0.66-0.94) | N                 | 0(0.469)                | (0.64-0.97)    | <b>0.91</b>             | p > 0.1¶          | Suggestive     |

| Author, year     | Comparison                   | Cancer type                   | RC T N.  | Interven - tion /control | Outcome                    | Me t- rics | M * p-Value | Reporte d * p-Value | Reported SE (95% CI) * | Reported I2 (%) (p-value) * | R/N/S †      | F p-Value §  | F SE (95% CI) §        | R p-Value §  | R SE (95% CI) §        | C ‡      | I2 (%) § (p-Value) | 95% Prediction Interval | Egger p-Value | Exces s Signif i- cance | Level of Evidence |
|------------------|------------------------------|-------------------------------|----------|--------------------------|----------------------------|------------|-------------|---------------------|------------------------|-----------------------------|--------------|--------------|------------------------|--------------|------------------------|----------|--------------------|-------------------------|---------------|-------------------------|-------------------|
| Zhou et al. 2017 | Rituximab maintenance vs obs | Diffuse large B-Cell lymphoma | 4        | 735/686                  | OS                         | HR         | F           | NA                  | 0.90(0.70-1.16)        | 0(0.947)                    | 0/4/0        | 0.4          | 0.90(0.70-1.15)        | 0.400        | 0.90(0.70-1.15)        | N        | 0(0.946)           | (0.52-1.56)             | <b>0.32</b>   | NA                      | No association    |
|                  |                              |                               | 3        | 658/661                  | PFS                        | HR         | R           | NA                  | 0.72(0.54-0.94)        | 41(0.184)                   | 0/1/2        | 0.001        | 0.71(0.58-0.88)        | 0.017        | 0.71(0.54-0.94)        | Y        | 42.54(0.175)       | (0.05-10.68)            | <b>0.67</b>   | p > 0.1                 | Suggestive        |
|                  |                              |                               | <b>4</b> | <b>735/686</b>           | <b>Event-free survival</b> | <b>HR</b>  | <b>F</b>    | <b>NA</b>           | <b>0.80(0.65-0.98)</b> | <b>0(0.703)</b>             | <b>0/3/1</b> | <b>0.004</b> | <b>0.80(0.69-0.93)</b> | <b>0.004</b> | <b>0.80(0.69-0.93)</b> | <b>N</b> | <b>0(0.735)</b>    | <b>(0.58-1.11)</b>      | <b>0.78</b>   | <b>p &gt; 0.1</b>       | <b>Suggestive</b> |

Abbreviations: RCT, randomized controlled trial; N., number; SE, standard effect; CI, confidence interval; M, model; F, fixed effect; R, random effect; NA, not available; C, concordance with largest study; Y, concordant with largest study; N, not concordant with largest study; OS, overall survival; PFS progression-free survival; DCR, disease control rate; RR, risk ratio; HR, hazard ratio; OR, odds ratio; CTx, chemotherapy; obs, observation. \* Value reported in original article of the meta-analysis. † Number of individual studies of effect size with statistical significance in the reverse direction/not statistically significant/statistically significant. ‡ Concordance of fixed and random effects summary outcome with outcome of largest individual study. § Value obtained from re-analysis of original meta-analysis. ES is estimated by assuming power of each study could be replaced by power of the study with most cases and controls. All p-Values are two-sided.

**Table S4.** Umbrella review summary and level of evidence reported in meta-analyses of adoptive cell immunotherapy for cancer.

| Author, year                                              | Comparison                       | Cancer type | RC<br>T<br>N. | Interven-<br>tion<br>/control | Outcome            | Me-<br>t-<br>rics | M<br>* | Reporte<br>d<br>p-Value<br>* | Reported<br>SE (95% CI)<br>* | Reported<br>I2(%<br>(p-Value)<br>* | R/N/S<br>† | F<br>p-<br>Value<br>§ | F SE<br>(95% CI) § | R<br>p-<br>Value<br>§ | R SE<br>(95% CI) § | C<br>‡ | I2(%<br>(p-Value) § | 95%<br>Prediction<br>Interval | Egger<br>p-<br>Value | Exces<br>s<br>Signif<br>i-<br>cance | Level of<br>Evidence |      |
|-----------------------------------------------------------|----------------------------------|-------------|---------------|-------------------------------|--------------------|-------------------|--------|------------------------------|------------------------------|------------------------------------|------------|-----------------------|--------------------|-----------------------|--------------------|--------|---------------------|-------------------------------|----------------------|-------------------------------------|----------------------|------|
| <b>Dendritic cells with cytokine-induced killer cells</b> |                                  |             |               |                               |                    |                   |        |                              |                              |                                    |            |                       |                    |                       |                    |        |                     |                               |                      |                                     |                      |      |
| <b>Hepatocellular carcinoma</b>                           |                                  |             |               |                               |                    |                   |        |                              |                              |                                    |            |                       |                    |                       |                    |        |                     |                               |                      |                                     |                      |      |
| Su et al. 2016                                            | DC/CIK vs obs with backbone TACE | HCC         | 4             | 127/123                       | 0.5-year OS        | OR                | F      | 0.23                         | 1.61(0.74–3.49)              | 20(0.29)                           | 0/4/0      | 0.235                 | 1.64(0.73–3.69)    | 0.312                 | 1.61(0.64–4.09)    | Y      | 32.29(0.219)        | (0.10–25.45)                  | <b>0.86</b>          | p > 0.1                             | No association       |      |
|                                                           |                                  |             | 3*            | 104/106                       | 1-year OS          | OR                | -      | -                            | -                            | -                                  | 0/3/0      | 0.027                 | 2.00(1.08–3.70)    | 0.027                 | 2.00(1.08–3.70)    | N      | 0(0.733)            | (0.04–107.12)                 | <b>0.12</b>          | p > 0.1                             | Weak                 |      |
|                                                           |                                  |             | 2*            | 72/68                         | 2-year OS          | OR                | -      | -                            | -                            | -                                  | 0/2/0      | 0.028                 | 2.16(1.09–4.32)    | 0.028                 | 2.16(1.09–4.32)    | N      | 0(0.685)            | -                             | -                    | -                                   | p > 0.1              | Weak |
|                                                           |                                  |             | 5*            | 250/245                       | Overall response   | OR                | -      | -                            | -                            | -                                  | 0/5/0      | 0.046                 | 1.47(1.01–2.16)    | 0.046                 | 1.47(1.01–2.16)    | N      | 0(0.893)            | (0.79–2.73)                   | <b>0.47</b>          | p > 0.1                             | Weak                 |      |
|                                                           |                                  |             | 5*            | 250/245                       | DCR                | OR                | -      | -                            | -                            | -                                  | 0/3/2      | 0.013                 | 1.81(1.13–2.90)    | 0.013                 | 1.81(1.13–2.90)    | Y      | 17.82(0.302)        | (0.35–9.60)                   | <b>0.55</b>          | p > 0.1                             | Suggestive           |      |
|                                                           |                                  |             | 4*            | 132/127                       | Quality of life    | OR                | -      | -                            | -                            | -                                  | 0/2/2      | 0.001                 | 3.07(1.58–5.97)    | 0.001                 | 3.07(1.58–5.97)    | N      | 0(0.95)             | (0.71–13.23)                  | <b>0.38</b>          | p > 0.1                             | Suggestive           |      |
| <b>Non-small cell lung cancer</b>                         |                                  |             |               |                               |                    |                   |        |                              |                              |                                    |            |                       |                    |                       |                    |        |                     |                               |                      |                                     |                      |      |
| Chen et al. 2014                                          | DC/CIK vs CT or p or obs         | NSCLC       | 2             | 75/75                         | 1-year OS          | RR                | F      | 0.05                         | 1.38(1.00–1.90)              | 35(0.21)                           | 0/1/1      | 0.083                 | 1.32(0.96–1.82)    | 0.207                 | 1.29(0.87–1.93)    | N      | 32.7(0.223)         | -                             | -                    | p > 0.1                             | No association       |      |
|                                                           |                                  |             | 2             | 75/75                         | 2-year OS          | RR                | F      | 0.005                        | 2.88(1.38–5.99)              | 0(0.74)                            | 0/1/1      | 0.005                 | 2.88(1.38–6.01)    | 0.005                 | 2.88(1.38–6.01)    | Y      | 0(0.745)            | -                             | -                    | p > 0.1                             | Weak                 |      |
|                                                           |                                  |             | 2             | 75/75                         | 3-year OS          | RR                | F      | 0.003                        | 11.67(2.28–59.69)            | 28(0.24)                           | 0/1/1      | 0.015                 | 7.83(1.49–41.19)   | 0.023                 | 8.14(1.33–49.66)   | Y      | 13.64(0.282)        | -                             | -                    | p > 0.1                             | Weak                 |      |
| Han et al. 2014                                           | DC/CIK + CTx vs CTx              | NSCLC       | 5             | 176/177                       | 1-year OS          | RR                | F      | 0.02                         | 1.06(1.01–1.11)              | 0(0.67)                            | 0/5/0      | 0.038                 | 1.05(1.00–1.09)    | 0.038                 | 1.05(1.00–1.09)    | N      | 0(0.725)            | (0.98–1.13)                   | <b>0.16</b>          | p > 0.1                             | Weak                 |      |
|                                                           |                                  |             | 4             | 146/147                       | 2-year OS          | RR                | F      | 0.21                         | 1.05(0.97–1.12)              | 0(0.82)                            | 0/4/0      | 0.293                 | 1.04(0.97–1.10)    | 0.293                 | 1.04(0.97–1.10)    | Y      | 0(0.845)            | (0.90–1.19)                   | <b>0.40</b>          | p > 0.1                             | No association       |      |
|                                                           |                                  |             | 5             | 176/177                       | 1-year PFS         | RR                | F      | 0.005                        | 1.09(1.03–1.15)              | 0(0.92)                            | 0/5/0      | 0.005                 | 1.08(1.02–1.14)    | 0.005                 | 1.08(1.02–1.14)    | N      | 0(0.926)            | (0.99–1.18)                   | <b>0.33</b>          | p > 0.1                             | Weak                 |      |
|                                                           |                                  |             | 3             | 117/117                       | 2-year PFS         | RR                | F      | 0.1                          | 1.08(0.98–1.19)              | 0(0.84)                            | 0/3/0      | 0.086                 | 1.08(0.99–1.17)    | 0.086                 | 1.08(0.99–1.17)    | Y      | 0(0.85)             | (0.63–1.84)                   | <b>0.50</b>          | p > 0.1                             | No association       |      |
|                                                           |                                  |             | 4             | 159/157                       | Overall response   | RR                | F      | 0.76                         | 1.06(0.74–1.51)              | 0(0.92)                            | 0/4/0      | 0.829                 | 1.04(0.73–1.47)    | 0.829                 | 1.04(0.73–1.47)    | Y      | 0(0.921)            | (0.48–2.24)                   | <b>0.08</b>          | p > 0.1                             | No association       |      |
|                                                           |                                  |             | 4             | 159/157                       | Partial response   | RR                | F      | 0.22                         | 1.23(0.88–1.71)              | 0(0.78)                            | 0/4/0      | 0.208                 | 1.23(0.89–1.71)    | 0.208                 | 1.23(0.89–1.71)    | Y      | 0(0.782)            | (0.60–2.53)                   | <b>0.74</b>          | p > 0.1                             | No association       |      |
| Wang et al. 2015                                          | DC/CIK + CT vs CT                | NSCLC       | 3             | 120/121                       | DCR                | RR                | F      | 0.006                        | 1.28(1.07–1.52)              | 3(0.36)                            | 0/2/1      | 0.009                 | 1.25(1.06–1.47)    | 0.009                 | 1.25(1.06–1.47)    | N      | 0(0.37)             | (0.43–3.62)                   | <b>0.26</b>          | p > 0.1                             | Suggestive           |      |
|                                                           |                                  |             | 5             | 222/223                       | OS                 | HR                | F      | <0.001                       | 0.62(0.49–0.79)              | 0.0(0.795)                         | 0/3/2      | <0.001                | 0.62(0.49–0.79)    | <0.001                | 0.62(0.49–0.79)    | Y      | 0(0.796)            | (0.42–0.91)                   | <b>0.99</b>          | p > 0.1                             | Suggestive           |      |
|                                                           |                                  |             | 5             | 191/192                       | PFS                | HR                | F      | <0.001                       | 0.53(0.39–0.71)              | 0.0(0.700)                         | 0/2/3      | <0.001                | 0.53(0.39–0.71)    | <0.001                | 0.53(0.39–0.71)    | Y      | 0(0.704)            | (0.32–0.86)                   | <b>0.76</b>          | p > 0.1                             | Suggestive           |      |
|                                                           |                                  |             | 2             | 91/91                         | Objective response | RR                | F      | 0.65                         | 1.19(0.56–2.53)              | 0.0(0.544)                         | 0/2/0      | 0.692                 | 1.17(0.54–2.50)    | 0.692                 | 1.17(0.54–2.50)    | Y      | 0(0.545)            | -                             | -                    | NA                                  | No association       |      |

| Author, year                         | Comparison                   | Cancer type                                                                                    | RC T N. | Interven - tion /control | Outcome          | Me t- rics      | M * p-Value * | Reporte d SE (95% CI) * | Reported I2(%) (p-Value) * | R/N/S †         | F p-Value § | F SE (95% CI) § | R p-Value §     | R SE (95% CI) § | C ‡             | I2(%) (p-Value) § | 95% Prediction Interval | Egger p-Value | Exces s Signif i- cance | Level of Evidence |                |
|--------------------------------------|------------------------------|------------------------------------------------------------------------------------------------|---------|--------------------------|------------------|-----------------|---------------|-------------------------|----------------------------|-----------------|-------------|-----------------|-----------------|-----------------|-----------------|-------------------|-------------------------|---------------|-------------------------|-------------------|----------------|
| Zheng et al. 2015                    | DC/CIK + CTx vs CTx          | NSCLC                                                                                          | 3       | 133/133                  | DCR              | RR              | F             | 0.009                   | 1.25(1.06–1.48)            | 0.0(0.424)      | 0/2/1       | 0.018           | 1.21(1.03–1.42) | 0.018           | 1.21(1.03–1.42) | Y                 | 0(0.468)                | (0.43–3.41)   | <b>0.06</b>             | NA                | Weak           |
|                                      |                              |                                                                                                | 2       | 56/56                    | 0.5-year OS      | RR              | F             | 0.01                    | 1.16(1.04–1.31)            | 0(0.98)         | 0/1/1       | 0.010           | 1.16(1.04–1.31) | 0.010           | 1.16(1.04–1.31) | Y                 | 0(0.979)                | –             | -                       | NA                | Weak           |
|                                      |                              |                                                                                                | 4       | 204/203                  | 1-year OS        | OR              | F             | 0.04                    | 1.57(1.02–2.40)            | 0(0.71)         | 0/3/1       | 0.040           | 1.56(1.02–2.40) | 0.040           | 1.56(1.02–2.40) | N                 | 1.97(0.382)             | (0.61–4.00)   | <b>0.67</b>             | <i>p</i> > 0.1    | Suggestive     |
|                                      |                              |                                                                                                | 4       | 196/195                  | 2-year OS        | RR              | F             | 0.002                   | 1.30(1.10–1.53)            | 0(0.46)         | 0/3/1       | 0.002           | 1.24(1.08–1.42) | 0.002           | 1.24(1.08–1.42) | N                 | 0(0.551)                | (0.92–1.67)   | <b>0.03</b>             | <i>p</i> > 0.1    | Weak           |
|                                      |                              |                                                                                                | 3       | 135/134                  | 3-year OS        | RR              | F             | 0.0007                  | 1.51(1.19–1.91)            | 0(0.80)         | 0/1/2       | 0.001           | 1.49(1.18–1.88) | <0.001          | 1.49(1.18–1.88) | Y                 | 0(0.806)                | (0.33–6.73)   | <b>0.13</b>             | <i>p</i> > 0.1    | Suggestive     |
|                                      |                              |                                                                                                | 3       | 141/141                  | Overall response | RR              | F             | 0.45                    | 1.15(0.80–1.65)            | 0(0.83)         | 0/3/0       | 0.475           | 1.14(0.80–1.62) | 0.475           | 1.14(0.80–1.62) | Y                 | 0(0.831)                | (0.11–11.34)  | <b>0.37</b>             | <i>p</i> > 0.1    | No association |
|                                      |                              |                                                                                                | 3       | 141/141                  | DCR              | RR              | F             | 0.002                   | 1.31(1.11–1.55)            | 17(0.30)        | 0/1/2       | 0.005           | 1.26(1.07–1.48) | 0.007           | 1.26(1.07–1.50) | Y                 | 10.08(0.329)            | (0.36–4.47)   | <b>0.22</b>             | <i>p</i> > 0.1    | Suggestive     |
| <b>DC/CIK NSCLC OS</b>               | <b>DC/CIK + CT vs CT</b>     | <b>NSCLC</b>                                                                                   | 10      | 387/427                  | OS(longest)      | RR              | -             | -                       | -                          | 0/7/3           | <0.001      | 0.82(0.75–0.89) | <0.001          | 0.82(0.75–0.89) | Y               | 0(0.589)          | (0.74–0.90)             | <b>0.19</b>   | <i>p</i> > 0.1          | Suggestive        |                |
| <b>Solid tumor</b>                   |                              |                                                                                                |         |                          |                  |                 |               |                         |                            |                 |             |                 |                 |                 |                 |                   |                         |               |                         |                   |                |
| Lan et al. 2015                      | DC/CIK + CTx vs CTx          | NSCLC or rectal cancer or colorectal cancer or colon cancer or breast cancer or gastric cancer | 2       | 69/69                    | 1-year DFS       | OR              | F             | 0.01                    | 0.16(0.04–0.67)            | 0(0.53)         | 0/2/0       | 0.020           | 0.18(0.04–0.76) | 0.020           | 0.18(0.04–0.76) | N                 | 0(0.543)                | -             | -                       | <i>p</i> > 0.1    | Weak           |
|                                      |                              |                                                                                                | 2       | 69/69                    | 2-year DFS       | OR              | F             | 0.06                    | 0.49(0.23–1.04)            | 65(0.09)        | 0/1/1       | 0.072           | 0.49(0.23–1.07) | 0.249           | 0.46(0.12–1.72) | Y                 | 64.52(0.093)            | -             | -                       | <i>p</i> > 0.1    | No association |
|                                      |                              |                                                                                                | 2       | 69/69                    | 3-year DFS       | OR              | F             | 0.003                   | 0.32(0.16–0.68)            | 42(0.19)        | 0/1/1       | 0.003           | 0.32(0.15–0.68) | 0.021           | 0.31(0.12–0.84) | N                 | 42.12(0.189)            | -             | -                       | <i>p</i> > 0.1    | Weak           |
|                                      |                              |                                                                                                | 6       | 177/175                  | 1-year OS        | OR              | F             | <0.0001                 | 0.22(0.11–0.44)            | 5(0.39)         | 0/5/1       | <0.001          | 0.22(0.11–0.45) | <0.001          | 0.23(0.11–0.48) | N                 | 4.54(0.388)             | (0.07–0.75)   | <b>0.69</b>             | <i>p</i> > 0.1    | Suggestive     |
|                                      |                              |                                                                                                | 6       | 177/175                  | 2-year OS        | OR              | F             | <0.0001                 | 0.28(0.14–0.53)            | 0(0.92)         | 0/5/1       | <0.001          | 0.28(0.15–0.53) | <0.001          | 0.28(0.15–0.53) | N                 | 0(0.921)                | (0.11–0.70)   | <b>0.92</b>             | <i>p</i> > 0.1    | Suggestive     |
|                                      |                              |                                                                                                | 5       | 195/202                  | 3-year OS        | OR              | F             | 0.009                   | 0.41(0.25–0.70)            | 35(0.19)        | 0/4/1       | 0.002           | 0.42(0.25–0.72) | 0.007           | 0.37(0.18–0.77) | N                 | 34.53(0.191)            | (0.06–2.51)   | <b>0.28</b>             | <i>p</i> > 0.1    | Suggestive     |
|                                      |                              |                                                                                                | 6       | 207/224                  | Overall response | OR              | F             | 0.004                   | 0.54(0.35–0.82)            | 0(0.63)         | 0/5/1       | 0.005           | 0.54(0.35–0.83) | 0.005           | 0.54(0.35–0.83) | Y                 | 0(0.634)                | (0.30–0.99)   | <b>0.36</b>             | <i>p</i> > 0.1    | Suggestive     |
| 5                                    | 175/192                      | DCR                                                                                            | OR      | F                        | 0.001            | 0.46(0.28–0.74) | 0(0.99)       | 0/4/1                   | 0.001                      | 0.46(0.28–0.74) | 0.001       | 0.46(0.28–0.74) | Y               | 0(0.994)        | (0.21–1.00)     | <b>0.51</b>       | <i>p</i> > 0.1          | Suggestive    |                         |                   |                |
| <b>Cytokine-induced killer cells</b> |                              |                                                                                                |         |                          |                  |                 |               |                         |                            |                 |             |                 |                 |                 |                 |                   |                         |               |                         |                   |                |
| <b>Hepatocellular carcinoma</b>      |                              |                                                                                                |         |                          |                  |                 |               |                         |                            |                 |             |                 |                 |                 |                 |                   |                         |               |                         |                   |                |
| Li et al. 2016                       | Adjuvant CIK vs no AT        | Treated HCC, Barcelona clinic liver cancer B or earlier stage                                  | 5       | 380/335                  | OS               | RR              | R             | 0.0003                  | 0.76(0.65–0.88)            | 50(0.009)       | 0/3/2       | 0.005           | 0.82(0.71–0.94) | 0.021           | 0.78(0.64–0.96) | Y                 | 41.96(0.142)            | (0.44–1.39)   | <b>0.04</b>             | <i>p</i> > 0.1    | Weak           |
|                                      |                              |                                                                                                | 7       | 460/405                  | PFS              | RR              | R             | 0.007                   | 0.74(0.59–0.92)            | 75(0.0006)      | 0/5/2       | <0.001          | 0.85(0.78–0.92) | 0.004           | 0.76(0.63–0.91) | N                 | 65.76(0.008)            | (0.45–1.29)   | <b>0.02</b>             | <i>p</i> > 0.1    | Weak           |
| Wang et al. 2016                     | CIK vs no AT after resection | Resected HCC                                                                                   | 4       | 374/329                  | 1-year OS        | RR              | F             | 0.001                   | 1.08(1.03–1.13)            | 0(0.42)         | 0/2/2       | 0.001           | 1.07(1.03–1.12) | <0.001          | 1.07(1.03–1.12) | Y                 | 0(0.43)                 | (0.98–1.17)   | <b>0.98</b>             | <i>p</i> > 0.1    | Suggestive     |
|                                      |                              |                                                                                                | 3       | 290/286                  | 2-year OS        | RR              | F             | 0.0002                  | 1.14(1.06–1.23)            | 0(0.57)         | 0/2/1       | <0.001          | 1.14(1.06–1.22) | <0.001          | 1.14(1.06–1.22) | Y                 | 0(0.578)                | (0.73–1.78)   | <b>0.95</b>             | <i>p</i> > 0.1    | Suggestive     |

| Author, year                                   | Comparison                                                       | Cancer type                  | RC T N. | Interven - tion /control | Outcome                         | Me t- rics | M * p-Value | Reporte d SE (95% CI) * | Reported I2 (%) (p-Value) * | R/N/S †     | F p-Value § | F SE (95% CI) § | R p-Value §     | R SE (95% CI) § | C ‡             | I2 (%) (p-Value) § | 95% Prediction Interval | Egger p-Value | Exces s Signif i- cance | Level of Evidence |                |
|------------------------------------------------|------------------------------------------------------------------|------------------------------|---------|--------------------------|---------------------------------|------------|-------------|-------------------------|-----------------------------|-------------|-------------|-----------------|-----------------|-----------------|-----------------|--------------------|-------------------------|---------------|-------------------------|-------------------|----------------|
|                                                |                                                                  |                              | 5       | 402/357                  | 3-year OS                       | RR         | F           | 0.02                    | 1.15(1.03-1.28)             | 0(0.81)     | 0/5/0       | 0.010           | 1.15(1.03-1.28) | 0.010           | 1.15(1.03-1.28) | N                  | 0(0.811)                | (0.97-1.36)   | <b>0.91</b>             | p > 0.1           | Weak           |
|                                                |                                                                  |                              | 3       | 290/286                  | 4-year OS                       | RR         | F           | 0.55                    | 1.07(0.86-1.32)             | 0(0.90)     | 0/3/0       | 0.469           | 1.08(0.88-1.33) | 0.469           | 1.08(0.88-1.33) | Y                  | 0(0.903)                | (0.28-4.14)   | <b>0.14</b>             | p > 0.1           | No association |
|                                                |                                                                  |                              | 3       | 260/217                  | 5-year OS                       | RR         | F           | 0.9                     | 0.98(0.73-1.31)             | 0(0.92)     | 0/3/0       | 0.936           | 0.99(0.74-1.32) | 0.936           | 0.99(0.74-1.32) | Y                  | 0(0.922)                | (0.15-6.39)   | <b>0.20</b>             | p > 0.1           | No association |
|                                                |                                                                  |                              | 5       | 419/369                  | 1-year recurrence-free survival | RR         | R           | 0.001                   | 1.22(1.08-1.37)             | 50(0.09)    | 0/1/4       | <0.001          | 1.20(1.11-1.31) | <0.001          | 1.22(1.09-1.36) | Y                  | 48.01(0.103)            | (0.86-1.71)   | <b>0.15</b>             | p > 0.1           | Suggestive     |
|                                                |                                                                  |                              | 3       | 290/286                  | 2-year recurrence-free survival | RR         | F           | <0.0001                 | 1.37(1.18-1.59)             | 34(0.22)    | 0/1/2       | <0.001          | 1.36(1.17-1.59) | 0.001           | 1.36(1.13-1.64) | Y                  | 34.32(0.218)            | (0.24-7.66)   | <b>0.98</b>             | p > 0.1           | Suggestive     |
|                                                |                                                                  |                              | 5       | 402/357                  | 3-year recurrence-free survival | RR         | F           | 0.004                   | 1.35(1.10-1.65)             | 7(0.37)     | 0/4/1       | 0.005           | 1.33(1.09-1.63) | 0.007           | 1.33(1.08-1.64) | Y                  | 6.8(0.368)              | (0.90-1.98)   | <b>0.87</b>             | p > 0.1           | Suggestive     |
|                                                |                                                                  |                              | 3       | 290/286                  | 4-year recurrence-free survival | RR         | F           | 0.66                    | 1.05(0.74-1.48)             | 0(0.66)     | 0/3/0       | 0.742           | 1.06(0.75-1.50) | 0.742           | 1.06(0.75-1.50) | Y                  | 0(0.66)                 | (0.11-10.04)  | <b>0.41</b>             | p > 0.1           | No association |
|                                                |                                                                  |                              | 3       | 260/217                  | 5-year recurrence-free survival | RR         | F           | 0.54                    | 1.17(0.71-1.94)             | 18(0.29)    | 0/3/0       | 0.540           | 1.17(0.70-1.97) | 0.622           | 1.16(0.64-2.09) | Y                  | 18.33(0.294)            | (0.01-142.53) | <b>0.64</b>             | p > 0.1           | No association |
| Yu et al. 2017                                 | Adjuvant CIK + CT vs CT                                          | HCC                          | 7       | 451/422                  | OS                              | HR         | R           | 0.000                   | 0.64(0.51-0.82)             | 50.4(0.060) | 0/3/4       | <0.001          | 0.66(0.57-0.77) | <0.001          | 0.64(0.51-0.82) | Y                  | 50.33(0.06)             | (0.34-1.23)   | <b>0.25</b>             | p > 0.1           | Suggestive     |
|                                                |                                                                  |                              | 4       | 263/216                  | Recurrence-free survival        | HR         | R           | 0.000                   | 0.64(0.51-0.78)             | 0(0.781)    | 0/1/3       | <0.001          | 0.63(0.51-0.78) | <0.001          | 0.63(0.51-0.78) | Y                  | 0(0.781)                | (0.40-1.01)   | <b>0.23</b>             | p > 0.1           | Suggestive     |
| <b>Other adoptive cellular immunotherapies</b> |                                                                  |                              |         |                          |                                 |            |             |                         |                             |             |             |                 |                 |                 |                 |                    |                         |               |                         |                   |                |
| <b>Hepatocellular carcinoma</b>                |                                                                  |                              |         |                          |                                 |            |             |                         |                             |             |             |                 |                 |                 |                 |                    |                         |               |                         |                   |                |
|                                                |                                                                  |                              | 2       | 96/55                    | 3-year OS                       | OR         | F           | 0.792                   | 0.91(0.45-1.84)             | 0.0(0.708)  | 0/2/0       | 0.792           | 0.91(0.45-1.84) | 0.792           | 0.91(0.45-1.84) | Y                  | 0(0.724)                | -             | -                       | p > 0.1           | No association |
| Xie et al. 2012                                | Postoperative ACI (LAK or CIK) vs no AT after curative resection | Pretreated HCC               | 3       | 85/78                    | 1-year recurrence rate          | OR         | F           | 0.003                   | 0.35(0.17-0.71)             | 6.7(0.342)  | 0/3/0       | 0.011           | 0.39(0.19-0.81) | 0.013           | 0.39(0.18-0.82) | N                  | 6.28(0.344)             | (0.00-63.67)  | <b>0.27</b>             | p > 0.1           | Weak           |
|                                                |                                                                  |                              | 3       | 85/78                    | 3-year recurrence rate          | OR         | F           | 0.001                   | 0.31(0.16-0.61)             | 0.0(0.648)  | 0/1/2       | 0.001           | 0.32(0.16-0.62) | 0.001           | 0.32(0.16-0.62) | Y                  | 0(0.914)                | (0.00-25.05)  | <b>0.52</b>             | p > 0.1           | Suggestive     |
|                                                |                                                                  |                              | 6¶      | 407/362                  | 1-year mortality                | RR         | -           | -                       | -                           | -           | 0/5/1       | 0.035           | 0.50(0.26-0.95) | 0.032           | 0.43(0.20-0.93) | N                  | 17.93(0.297)            | (0.09-2.12)   | <b>0.01</b>             | p > 0.1           | Weak           |
| Yuan et al. 2017                               | Postoperative ACI (CIK or LAK + IL-2 or lymphocytes) vs no AT    | Pretreated HCC, not advanced | 6¶      | 407/362                  | 2-year mortality                | RR         | -           | -                       | -                           | -           | 0/6/0       | 0.002           | 0.52(0.34-0.78) | 0.002           | 0.52(0.34-0.78) | N                  | 0(0.685)                | (0.29-0.93)   | <b>0.59</b>             | p > 0.1           | Weak           |
|                                                |                                                                  |                              | 6¶      | 407/362                  | 3-year mortality                | RR         | -           | -                       | -                           | -           | 0/5/1       | 0.009           | 0.71(0.55-0.92) | 0.009           | 0.71(0.55-0.92) | N                  | 0(0.593)                | (0.49-1.02)   | <b>0.81</b>             | p > 0.1           | Suggestive     |
|                                                |                                                                  |                              | 2¶      | 160/117                  | 5-year mortality                | RR         | -           | -                       | -                           | -           | 0/2/0       | 0.920           | 0.99(0.83-1.19) | 0.920           | 0.99(0.83-1.19) | Y                  | 0(0.966)                | -             | -                       | p > 0.1           | No association |



| Author, year                      | Comparison                                                                  | Cancer type                     | RC T N. | Interven - tion /control | Outcome                | Me t- rics | M * | Reporte d p-Value * | Reported SE (95% CI) * | Reported I2(%) (p-Value) * | R/N/S † | F p-Value § | F SE (95% CI) § | R p-Value § | R SE (95% CI) § | C ‡ | I2(%) (p-Value) § | 95% Prediction Interval | Egger p-Value | Exces s Signif i- cance | Level of Evidence |
|-----------------------------------|-----------------------------------------------------------------------------|---------------------------------|---------|--------------------------|------------------------|------------|-----|---------------------|------------------------|----------------------------|---------|-------------|-----------------|-------------|-----------------|-----|-------------------|-------------------------|---------------|-------------------------|-------------------|
|                                   |                                                                             |                                 | 8¶      | 483/432                  | 1-year recurrence rate | RR         | -   | -                   | -                      | -                          | 0/6/2   | <0.001      | 0.54(0.42-0.71) | <0.001      | 0.54(0.42-0.71) | N   | 0(0.495)          | (0.39-0.75)             | <b>0.41</b>   | p > 0.1                 | Suggestive        |
|                                   |                                                                             |                                 | 6¶      | 407/362                  | 2-year recurrence rate | RR         | -   | -                   | -                      | -                          | 0/3/3   | <0.001      | 0.62(0.51-0.75) | <0.001      | 0.62(0.51-0.75) | Y   | 0(0.426)          | (0.48-0.81)             | <b>0.80</b>   | p > 0.1                 | Suggestive        |
|                                   |                                                                             |                                 | 6¶      | 407/362                  | 3-year recurrence rate | RR         | -   | -                   | -                      | -                          | 0/5/1   | 0.001       | 0.81(0.72-0.92) | 0.001       | 0.81(0.72-0.92) | N   | 0(0.772)          | (0.68-0.97)             | <b>0.30</b>   | p > 0.1                 | Suggestive        |
|                                   |                                                                             |                                 | 2¶      | 160/117                  | 5-year recurrence rate | RR         | -   | -                   | -                      | -                          | 0/2/0   | 0.110       | 0.92(0.83-1.02) | 0.110       | 0.92(0.83-1.02) | Y   | 0(0.58)           | -                       | -             | p > 0.1                 | No association    |
| <b>Non-small cell lung cancer</b> |                                                                             |                                 |         |                          |                        |            |     |                     |                        |                            |         |             |                 |             |                 |     |                   |                         |               |                         |                   |
|                                   | LAK + IL-2 + CTx vs CTx                                                     | NSCLC                           | 2       | 82/88                    | OS                     | HR         | R   | 0.04                | 0.54(0.30-0.97)        | 55(0.14)                   | 0/1/1   | 0.003       | 0.56(0.38-0.82) | 0.039       | 0.54(0.30-0.97) | N   | 54.81(0.137)      | -                       | -             | NA                      | Weak              |
|                                   | DC/CIK or CIK + CT vs CT                                                    | NSCLC                           | 2       | 43/44                    | OS                     | HR         | F   | 0.01                | 0.55(0.35-0.87)        | 0(0.84)                    | 0/1/1   | 0.010       | 0.56(0.35-0.87) | 0.010       | 0.56(0.35-0.87) | Y   | 0(0.856)          | -                       | -             | NA                      | Weak              |
|                                   | DC/CIK or CIK + CTx vs CTx                                                  | NSCLC                           | 3       | 98/98                    | DCR                    | OR         | F   | 0.006               | 2.84(1.35-5.97)        | 0(0.46)                    | 0/2/1   | 0.040       | 2.79(1.31-5.94) | 0.067       | 2.79(1.31-5.94) | N   | 0(0.419)          | (0.02-377.46)           | <b>0.31</b>   | p > 0.1                 | No association    |
| Mi et al. 2016                    | Postoperative ACI (LAK + IL-2 or TIL + IL-2) + CT vs CT                     | NSCLC                           | 3       | 138/145                  | OS                     | HR         | F   | 0.0003              | 0.60(0.46-0.79)        | 20(0.29)                   | 0/1/2   | <0.001      | 0.60(0.46-0.79) | 0.001       | 0.60(0.44-0.81) | Y   | 19.95(0.287)      | (0.04-7.93)             | <b>0.40</b>   | p > 0.1                 | Suggestive        |
|                                   | ACI(CIK or DC/CIK or TIL) + CT vs CT                                        | NSCLC                           | 4       | 255/210                  | DCR                    | OR         | F   | 0.004               | 2.02(1.24-3.29)        | 0(0.40)                    | 0/3/1   | 0.007       | 1.98(1.21-3.25) | 0.007       | 1.98(1.21-3.25) | N   | 3.77(0.374)       | (0.67-5.86)             | <b>0.25</b>   | p > 0.1                 | Suggestive        |
|                                   | IT(CIK or DC/CIK or IL-2) + CTx vs CTx                                      | NSCLC                           | 3       | 170/156                  | OS                     | HR         | F   | 0.04                | 0.77(0.60-0.99)        | 34(0.22)                   | 0/2/1   | 0.040       | 0.77(0.60-0.99) | 0.067       | 0.72(0.51-1.02) | N   | 32.2(0.229)       | (0.03-18.03)            | <b>0.41</b>   | NA                      | No association    |
| Zeng et al. 2016                  | Postoperative ACI(AKT-DC or DC/CIK or LAK + IL-2 or TIL + rIL-2) + CT vs CT | Resected NSCLC                  | 4       | 234/238                  | OS                     | HR         | F   | 0.002               | 0.61(0.45-0.84)        | 42(0.16)                   | 0/3/1   | 0.002       | 0.62(0.45-0.84) | 0.013       | 0.59(0.39-0.89) | N   | 39.65(0.174)      | (0.14-2.56)             | <b>0.16</b>   | p > 0.1                 | Suggestive        |
|                                   |                                                                             |                                 | 13¶     | 718/844                  | 1-year OS              | RR         | -   | -                   | -                      | -                          | 0/8/5   | <0.001      | 1.15(1.10-1.21) | <0.001      | 1.19(1.11-1.27) | Y   | 25.14(0.19)       | (1.03-1.37)             | <b>0.01</b>   | p > 0.1                 | Weak              |
|                                   |                                                                             |                                 | 11¶     | 669/755                  | 2-year OS              | RR         | -   | -                   | -                      | -                          | 0/5/6   | <0.001      | 1.43(1.30-1.58) | <0.001      | 1.43(1.30-1.58) | Y   | 0(0.562)          | (1.28-1.61)             | <b>0.24</b>   | p > 0.1                 | Convincing        |
|                                   |                                                                             |                                 | 8¶      | 529/613                  | 3-year OS              | RR         | -   | -                   | -                      | -                          | 0/5/3   | <0.001      | 1.45(1.24-1.69) | <0.001      | 1.45(1.24-1.69) | N   | 0(0.639)          | (1.19-1.76)             | <b>0.31</b>   | p > 0.1                 | Suggestive        |
| Zhao et al. 2017                  | ACI(LAK + IL-2 or DC/CIK or CIK or AKT or TIL) vs CT                        | NSCLC, operated or non-operated | 5¶      | 400/485                  | 5-year OS              | RR         | -   | -                   | -                      | -                          | 0/2/3   | <0.001      | 1.71(1.39-2.11) | 0.031       | 1.67(1.05-2.67) | N   | 77.03(0.002)      | (0.32-8.72)             | <b>0.87</b>   | p > 0.1                 | Suggestive        |
|                                   |                                                                             |                                 | 4¶      | 187/229                  | 1-year PFS             | RR         | -   | -                   | -                      | -                          | 0/2/2   | <0.001      | 1.46(1.24-1.72) | 0.031       | 1.46(1.24-1.72) | Y   | 0(0.877)          | (1.02-2.09)             | <b>0.16</b>   | p > 0.1                 | Suggestive        |
|                                   |                                                                             |                                 | 2¶      | 137/138                  | 2-year PFS             | RR         | -   | -                   | -                      | -                          | 0/1/1   | <0.001      | 1.69(1.29-2.23) | 0.027       | 1.79(1.07-2.99) | N   | 68.9(0.073)       | -                       | -             | p > 0.1                 | Weak              |
|                                   |                                                                             |                                 | 4       | 141/182                  | Objective response     | RR         | F   | 0.293               | 1.21(0.85-1.72)        | 0.0(3.98)                  | 0/3/1   | 0.220       | 1.25(0.88-1.77) | 0.220       | 1.25(0.88-1.77) | Y   | 0(0.402)          | (0.58-2.70)             | <b>0.59</b>   | p > 0.1                 | No association    |

| Author, year                | Comparison                                         | Cancer type    | RC T N.  | Interven - tion /control | Outcome                   | Me t- rics | M * p-Value | Reporte d p-Value * | Reported SE (95% CI) * | Reported I2(%) (p-Value) * | R/N/S †      | F p-Value §  | F SE (95% CI) §        | R p-Value §  | R SE (95% CI) §        | C ‡ (p-Value) § | I2(%) (p-Value) §   | 95% Prediction Interval | Egger p-Value | Exces s Signif i- cance | Level of Evidence     |
|-----------------------------|----------------------------------------------------|----------------|----------|--------------------------|---------------------------|------------|-------------|---------------------|------------------------|----------------------------|--------------|--------------|------------------------|--------------|------------------------|-----------------|---------------------|-------------------------|---------------|-------------------------|-----------------------|
|                             |                                                    |                | 4        | 141/182                  | DCR                       | RR         | R           | 0.123               | 1.16(0.96-1.40)        | 52.4(0.098)                | 0/2/2        | 0.055        | 1.13(1.00-1.27)        | 0.099        | 1.16(0.97-1.37)        | N               | 43.21(0.152)        | (0.62-2.16)             | <b>0.40</b>   | p > 0.1                 | No association        |
| <b>Renal cell carcinoma</b> |                                                    |                |          |                          |                           |            |             |                     |                        |                            |              |              |                        |              |                        |                 |                     |                         |               |                         |                       |
| Tang et al. 2013            | ACI(autolymphocyte or LAK or TIL or CIK) vs no ACI | Metastatic RCC | 4        | 235/224                  | 1-year OS                 | RR         | F           | 0.0008              | 1.30(1.12-1.52)        | 0(0.58)                    | 0/3/1        | <0.001       | 1.33(1.15-1.54)        | <0.001       | 1.33(1.15-1.54)        | N               | 0(0.603)            | (0.97-1.83)             | <b>0.205</b>  | p > 0.1                 | Suggestive            |
|                             |                                                    |                | 3        | 154/155                  | 3-year OS                 | RR         | F           | <0.00001            | 2.76(1.85-4.14)        | 46(0.16)                   | 0/1/2        | <0.001       | 2.61(1.74-3.92)        | 0.005        | 2.63(1.33-5.19)        | Y               | 45.26(0.161)        | (0.00-2468.29)          | <b>0.89</b>   | p > 0.1                 | Suggestive            |
|                             |                                                    |                | 2        | 109/110                  | 5-year OS                 | RR         | F           | 0.01                | 2.42(1.21-4.83)        | 28(0.24)                   | 0/1/1        | 0.017        | 2.36(1.16-4.77)        | 0.062        | 2.26(0.96-5.31)        | N               | 27.88(0.239)        | -                       | -             | p > 0.1                 | No association        |
|                             |                                                    |                | <b>4</b> | <b>226/228</b>           | <b>Objective response</b> | <b>RR</b>  | <b>F</b>    | <b>0.007</b>        | <b>1.65(1.15-2.38)</b> | <b>49(0.12)</b>            | <b>0/3/1</b> | <b>0.005</b> | <b>1.70(1.17-2.46)</b> | <b>0.270</b> | <b>1.50(0.73-3.08)</b> | <b>N</b>        | <b>49.11(0.117)</b> | <b>(0.10-21.44)</b>     | <b>0.60</b>   | <b>p &gt; 0.1</b>       | <b>No association</b> |

Abbreviations: RCT, randomized controlled trial; N., number; SE, standard effect; CI, confidence interval; M, model; F, fixed effect; R, random effect; NA, not available; C, concordance with largest study; Y, concordant with largest study; N, not concordant with largest study; OS, overall survival; PFS progression-free survival; RR, risk ratio; HR, hazard ratio; OR, odds ratio; DC/CIK, dendritic cells with cytokine-induced killer cells; obs, observation; CT, conventional therapy; p, placebo; CTx, chemotherapy; CIK, cytokine-induced killer cells; AT, adjuvant therapy; ACI, adjuvant cell immunotherapy; LAK, lymphokine-activated killer cells; IL-2, Interleukin-2; TIL, tumor-infiltrating lymphocytes; AKT, activated killer T-cells; HCC, hepatocellular carcinoma; NSCLC, non-small cell lung cancer; RCC, renal cell cancer. \* Value reported in original article of the meta-analysis. † Number of individual studies of effect size with statistical significance in the reverse direction/not statistically significant/statistically significant. ‡ Concordance of fixed and random effects summary outcome with outcome of largest individual study. § Value obtained from re-analysis of original meta-analysis. Re-analysis was performed after excluding non-RCTs from original meta-analysis. All p-Values are two-sided.

**Table S5.** Umbrella review summary and level of evidence reported in meta-analyses of cancer therapeutic immunomodulatory cytokines.

| Author, year                    | Comparison                                                  | Cancer type                             | RC T N. | Interven - tion /control | Outcome       | Me t- rics | M * p-Value | Reporte d p-Value * | Reported SE (95% CI) * | Reported I2(%) (p-Value) * | R/N/S † | F p-Value § | F SE (95% CI) § | R p-Value § | R SE (95% CI) § | C ‡ (p-Value) § | I2(%) (p-Value) § | 95% Prediction Interval | Egger p-Value | Exces s Signif i- cance | Level of Evidence |
|---------------------------------|-------------------------------------------------------------|-----------------------------------------|---------|--------------------------|---------------|------------|-------------|---------------------|------------------------|----------------------------|---------|-------------|-----------------|-------------|-----------------|-----------------|-------------------|-------------------------|---------------|-------------------------|-------------------|
| <b>Interferon- α</b>            |                                                             |                                         |         |                          |               |            |             |                     |                        |                            |         |             |                 |             |                 |                 |                   |                         |               |                         |                   |
| <b>Colorectal cancer</b>        |                                                             |                                         |         |                          |               |            |             |                     |                        |                            |         |             |                 |             |                 |                 |                   |                         |               |                         |                   |
| Thirion et al. 2000             | IFN-α + 5FU vs leucovorin + 5FU                             | Colorectal cancer                       | 7       | 744/744                  | OS            | HR         | NA          | 0.066               | 1.11(0.99-1.24)        | NA (0.495)                 | 0/7/0   | 0.036       | 1.02(0.98-1.05) | 0.403       | 1.02(0.98-1.05) | Y               | 0(0.494)          | (0.96-1.08)             | <b>0.38</b>   | p > 0.1                 | No association    |
|                                 |                                                             |                                         | 7       | 650/655                  | Response rate | RR         | NA          | 0.042               | 1.26(1.01-1.59)        | NA (0.001)                 | 2/5/0   | 0.036       | 1.06(1.00-1.12) | 0.276       | 1.08(0.94-1.24) | Y               | 79.46(0)          | (0.69-1.68)             | <b>0.77</b>   | p > 0.1                 | No association    |
|                                 | IFN-α + 5FU vs 5FU, with or without leucovorin in both arms | Colorectal cancer                       | 12      | 879/887                  | OS            | HR         | NA          | 0.33                | 0.95(0.86-1.05)        | NA (0.11)                  | 0/12/0  | 0.203       | 1.02(0.99-1.05) | 0.203       | 1.02(0.99-1.05) | Y               | 0(0.866)          | (0.99-1.06)             | <b>0.97</b>   | p > 0.1                 | No association    |
|                                 |                                                             |                                         | 12      | 838/845                  | Response rate | RR         | NA          | 0.8                 | 1.02(0.87-1.20)        | NA (0.15)                  | 0/11/1  | 0.997       | 1.00(0.95-1.05) | 0.893       | 1.00(0.94-1.07) | Y               | 34.15(0.117)      | (0.85-1.18)             | <b>0.78</b>   | p > 0.1                 | No association    |
| <b>Hepatocellular carcinoma</b> |                                                             |                                         |         |                          |               |            |             |                     |                        |                            |         |             |                 |             |                 |                 |                   |                         |               |                         |                   |
| Jiang et al. 2013               |                                                             | Pretreated HCC, viral hepatitis related | 9       | 498/451                  | Mortality     | OR         | F           | <0.00001            | 0.42(0.32-0.56)        | 0(0.54)                    | 0/6/3   | <0.001      | 0.43(0.32-0.56) | <0.001      | 0.43(0.32-0.56) | Y               | 0(0.536)          | (0.31-0.59)             | <b>0.91</b>   | p > 0.1                 | Suggestive        |

| Author, year                                 | Comparison                                                                     | Cancer type                               | RC T N. | Interven- tion /control | Outcome                  | Me- t- rics | M * p-Value | Reporte d SE (95% CI) * | Reported I2(%) (p-Value) * | R/N/S †     | F p-Value § | F SE (95% CI) § | R p-Value §     | R SE (95% CI) § | C ‡             | I2(%) (p-Value) § | 95% Prediction Interval | Egger p-Value | Exces s Signif i- cance | Level of Evidence |                |
|----------------------------------------------|--------------------------------------------------------------------------------|-------------------------------------------|---------|-------------------------|--------------------------|-------------|-------------|-------------------------|----------------------------|-------------|-------------|-----------------|-----------------|-----------------|-----------------|-------------------|-------------------------|---------------|-------------------------|-------------------|----------------|
|                                              | Post-surgical adjuvant IFN(mostly IFN-α) vs p after surgical resection or TACE |                                           | 9       | 499/476                 | Recurrence rate          | OR          | F           | 0.002                   | 0.66(0.50-0.86)            | 0(0.67)     | 0/8/1       | 0.003           | 0.66(0.51-0.87) | 0.003           | 0.66(0.51-0.87) | N                 | 0(0.667)                | (0.48-0.92)   | <b>0.08</b>             | p > 0.1           | Weak           |
| <b>Melanoma</b>                              |                                                                                |                                           |         |                         |                          |             |             |                         |                            |             |             |                 |                 |                 |                 |                   |                         |               |                         |                   |                |
| Ives et al. 2007                             | IFN-α + CTx vs CTx                                                             | Metastatic melanoma                       | 8       | 678/585                 | OS                       | OR          | NA          | 0.9                     | 0.99(0.88-1.12)            | NA (0.002)  | 0/6/2       | 0.991           | 1.00(0.72-1.40) | 0.505           | 1.23(0.67-2.26) | Y                 | 62.46(0.009)            | (0.21-7.16)   | <b>0.06</b>             | p > 0.1           | No association |
|                                              |                                                                                |                                           | 11      | 683/607                 | Overall response         | OR          | NA          | 0.0002                  | 0.60(0.46-0.79)            | NA (0.4)    | 0/8/3       | 0.001           | 0.58(0.44-0.77) | <0.001          | 0.58(0.44-0.77) | Y                 | 0(0.459)                | (0.40-0.84)   | <b>0.49</b>             | p > 0.1           | Convincing     |
|                                              |                                                                                |                                           | 10      | 662/583                 | Complete response        | OR          | NA          | <0.00001                | 0.33(0.20-0.53)            | NA (0.7)    | 0/8/2       | <0.001          | 0.33(0.19-0.57) | <0.001          | 0.33(0.19-0.57) | Y                 | 0(0.796)                | (0.17-0.64)   | <b>0.54</b>             | p > 0.1           | Convincing     |
| Ives et al. 2017                             | Adjuvant IFN-α vs obs                                                          | High-risk malignant melanoma              | 10      | 662/583                 | Partial response         | OR          | NA          | 0.2                     | 0.81(0.59-1.11)            | NA (0.9)    | 0/10/0      | 0.223           | 0.82(0.59-1.13) | 0.223           | 0.82(0.59-1.13) | Y                 | 0(0.9)                  | (0.56-1.20)   | <b>0.54</b>             | p > 0.1           | No association |
|                                              |                                                                                |                                           | 18      | 4520/3179               | OS                       | HR          | NA          | 0.003                   | NA                         | NA (0.8)    | 0/17/1      | 0.017           | 0.91(0.84-0.98) | 0.017           | 0.91(0.84-0.98) | N                 | 0(0.992)                | (0.83-0.99)   | <b>0.22</b>             | p > 0.1           | Suggestive     |
|                                              |                                                                                |                                           | 18      | 4520/3177               | Event-free survival      | HR          | NA          | <0.00001                | NA                         | NA (0.8)    | 0/18/0      | <0.001          | 0.86(0.80-0.92) | <0.001          | 0.86(0.80-0.92) | N                 | 0(0.981)                | (0.79-0.93)   | <b>0.23</b>             | p > 0.1           | Weak           |
| Mocellin et al. 2013                         | Adjuvant IFN-α vs CT                                                           | Cutaneous melanoma                        | 15      | 5412/3771               | OS                       | HR          | F           | 0.0029                  | 0.91(0.85-0.97)            | 6(0.38)     | 1/10/4      | 0.003           | 0.91(0.85-0.97) | 0.004           | 0.91(0.85-0.97) | N                 | 4.77(0.399)             | (0.82-1.00)   | <b>0.06</b>             | p > 0.1¶          | Weak           |
|                                              |                                                                                |                                           | 17      | 5638/3963               | Disease-free survival    | HR          | F           | <0.00001                | 0.83(0.78-0.87)            | 16(0.27)    | 0/10/7      | <0.001          | 0.83(0.78-0.87) | <0.001          | 0.82(0.77-0.88) | N                 | 12.8(0.304)             | (0.73-0.93)   | <b>0.03</b>             | p > 0.1¶          | Weak           |
| Myeloma Trialists' Collaborative Group. 2011 | IFN in induction therapy vs CT                                                 | Melanoma                                  | 12      | 1230/1239               | Mortality                | OR          | NA          | 0.1                     | NA                         | NA (0.2)    | 0/12/0      | 0.199           | 0.89(0.74-1.06) | 0.199           | 0.89(0.74-1.06) | Y                 | 0(0.878)                | (0.72-1.09)   | <b>0.14</b>             | p > 0.1           | No association |
|                                              |                                                                                |                                           | 10      | 685/638                 | PFS                      | OR          | NA          | 0.0003                  | NA                         | NA (0.07)   | 0/9/1       | 0.089           | 0.81(0.63-1.03) | 0.138           | 0.80(0.59-1.08) | Y                 | 23.61(0.226)            | (0.42-1.51)   | <b>0.33</b>             | p > 0.1           | No association |
|                                              | IFN in maintenance therapy vs CT                                               | Melanoma                                  | 12      | 767/776                 | Mortality                | OR          | NA          | 0.04                    | NA                         | NA (0.1)    | 0/11/1      | 0.072           | 0.81(0.65-1.02) | 0.083           | 0.81(0.64-1.03) | Y                 | 9.77(0.349)             | (0.54-1.21)   | <b>0.48</b>             | p > 0.1           | No association |
| Pirard et al. 2004                           | Postsurgical adjuvant IFN-α vs control                                         | Postsurgical Melanoma, stage IV unincuded | 12      | 767/777                 | PFS                      | OR          | NA          | <0.00001                | NA                         | NA (0.03)   | 0/7/5       | <0.001          | 0.57(0.44-0.73) | <0.001          | 0.53(0.38-0.76) | N                 | 40.34(0.072)            | (0.21-1.34)   | <b>0.06</b>             | p > 0.1           | Weak           |
|                                              |                                                                                |                                           | 9       | 1399/1438               | OS                       | OR          | F           | 0.1029                  | 0.87(0.74-1.02)            | NA (0.7376) | 0/9/0       | 0.107           | 0.88(0.74-1.03) | 0.107           | 0.88(0.74-1.03) | Y                 | 0(0.733)                | (0.72-1.06)   | <b>0.33</b>             | p > 0.1           | No association |
|                                              |                                                                                |                                           | 10      | 1483/1508               | Recurrence rate          | OR          | F           | 0.0001                  | 0.74(0.64-0.86)            | NA (0.2808) | 0/7/3       | <0.001          | 0.75(0.64-0.87) | <0.001          | 0.74(0.62-0.88) | N                 | 17.29(0.284)            | (0.53-1.03)   | <b>0.68</b>             | p > 0.1           | Suggestive     |
| Sasse et al. 2013                            | IFN-α + CTx vs CTx                                                             | Metastatic malignant melanoma             | 4       | 266/260                 | OS                       | OR          | F           | 0.15                    | 0.74(0.49-1.12)            | 0(0.87)     | 0/4/0       | 0.159           | 0.74(0.49-1.13) | 0.159           | 0.74(0.49-1.13) | Y                 | 0(0.872)                | (0.29-1.86)   | <b>0.17</b>             | p > 0.1           | No association |
|                                              |                                                                                |                                           | 7       | 548/460                 | 1-year survival          | RR          | R           | 0.18                    | 1.18(0.93-1.50)            | 30(0.20)    | 0/6/1       | 0.116           | 1.16(0.96-1.40) | 0.176           | 1.18(0.93-1.50) | Y                 | 29.98(0.199)            | (0.68-2.03)   | <b>0.58</b>             | p > 0.1           | No association |
|                                              |                                                                                |                                           | 6       | 518/429                 | 2-year survival          | RR          | R           | 0.33                    | 1.19(0.84-1.67)            | 0(0.63)     | 0/6/0       | 0.328           | 1.19(0.84-1.67) | 0.328           | 1.19(0.84-1.67) | Y                 | 0(0.629)                | (0.73-1.92)   | <b>0.25</b>             | p > 0.1           | No association |
|                                              |                                                                                |                                           | 10      | 705/626                 | Overall response         | RR          | R           | 0.036                   | 1.32(1.02-1.71)            | 23(0.23)    | 0/8/2       | 0.010           | 1.33(1.07-1.66) | 0.036           | 1.32(1.02-1.71) | Y                 | 23.12(0.23)             | (0.76-2.29)   | <b>0.59</b>             | p > 0.1           | Suggestive     |
| Verma et al. 2006                            | Adjuvant IFN (high dose, mostly IFN-α) vs VAX or obs                           | Resected melanoma                         | 3       | 802/792                 | 2-year mortality         | RR          | R           | 0.03                    | 0.85(0.73-0.99)            | NA (0.91)   | 0/3/0       | 0.031           | 0.85(0.73-0.99) | 0.031           | 0.85(0.73-0.99) | N                 | 0(0.914)                | (0.31-2.28)   | <b>0.09</b>             | p > 0.1           | Weak           |
| Wheatley et al. 2003                         | IFN-α vs obs                                                                   | Metastatic, high-risk melanoma            | 13      | 3075/2007               | OS                       | HR          | NA          | 0.1                     | NA                         | NA (0.9)    | 0/13/0      | 0.462           | 0.98(0.92-1.04) | 0.462           | 0.98(0.92-1.04) | Y                 | 0.00(0.964)             | (0.91-1.05)   | <b>0.08</b>             | NA                | No association |
|                                              |                                                                                |                                           | 14      | 3144/2037               | Recurrence-free survival | HR          | NA          | <0.00001                | NA                         | NA (0.4)    | 0/11/3      | <0.001          | 0.92(0.88-0.97) | <0.001          | 0.92(0.88-0.97) | Y                 | 4.86(0.398)             | (0.86-0.99)   | <b>0.07</b>             | NA                | Weak           |

| Author, year                      | Comparison                                             | Cancer type                            | RC T N. | Interven - tion /control | Outcome           | Me t- rics | M * p-Value | Reporte d SE (95% CI) * | Reported I2(%) (p-Value) *                | R/N/S †    | F p-Value § | F SE (95% CI) § | R p-Value §                               | R SE (95% CI) § | C ‡                                       | I2(%) (p-Value) § | 95% Prediction Interval                   | Egger p-Value | Exces s Signif i- cance | Level of Evidence |                                |
|-----------------------------------|--------------------------------------------------------|----------------------------------------|---------|--------------------------|-------------------|------------|-------------|-------------------------|-------------------------------------------|------------|-------------|-----------------|-------------------------------------------|-----------------|-------------------------------------------|-------------------|-------------------------------------------|---------------|-------------------------|-------------------|--------------------------------|
| Xin et al. 2016                   | IFN-α + dacarbazine vs dacarbazine                     | Cutaneous malignant melanoma           | 7       | 545/448                  | 1-year OS         | RR         | F           | 0.28                    | 1.10(0.92-1.31)                           | 42(0.11)   | 0/6/1       | 0.272           | 1.10(0.93-1.32)                           | 0.316           | 1.14(0.88-1.46)                           | Y                 | 41.76(0.112)                              | (0.60-2.15)   | <b>0.39</b>             | p > 0.1           | No association                 |
|                                   |                                                        |                                        | 5       | 327/233                  | 2-year OS         | RR         | R           | 0.05                    | 1.59(0.99-2.54)                           | 0(0.64)    | 0/5/0       | 0.700           | 1.55(0.96-2.50)                           | 0.700           | 1.55(0.96-2.50)                           | Y                 | 0(0.639)                                  | (0.72-3.37)   | <b>0.17</b>             | p > 0.1           | No association                 |
|                                   |                                                        |                                        | 2       | 228/142                  | 3-year OS         | RR         | F           | 0.4                     | 0.62(0.20-1.87)                           | 0(0.71)    | 0/2/0       | 0.393           | 0.62(0.20-1.87)                           | 0.393           | 0.62(0.20-1.87)                           | Y                 | 0(0.713)                                  | -             | -                       | p > 0.1           | No association                 |
|                                   |                                                        |                                        | 8       | 438/357                  | Overall response  | RR         | R           | 0.0008                  | 1.59(1.21-2.08)                           | 0(0.72)    | 0/6/2       | 0.001           | 1.59(1.21-2.09)                           | <0.001          | 1.59(1.21-2.09)                           | N                 | 0(0.717)                                  | (1.13-2.24)   | <b>0.40</b>             | p > 0.1           | Suggestive                     |
|                                   |                                                        |                                        | 8       | 438/357                  | Complete response | RR         | R           | <0.0001                 | 3.30(1.89-5.76)                           | 0(0.70)    | 0/6/2       | <0.001          | 3.12(1.75-5.56)                           | <0.001          | 3.12(1.75-5.56)                           | N                 | 0(0.703)                                  | (1.46-6.66)   | <b>0.52</b>             | p > 0.1           | Suggestive                     |
|                                   |                                                        |                                        | 8       | 438/357                  | Partial response  | RR         | F           | 0.76                    | 1.05(0.74-1.50)                           | 0(1.00)    | 0/8/0       | 0.765           | 1.05(0.74-1.50)                           | 0.765           | 1.05(0.74-1.50)                           | Y                 | 0(0.997)                                  | (0.68-1.63)   | <b>0.71</b>             | p > 0.1           | No association                 |
| <b>Follicular lymphoma</b>        |                                                        |                                        |         |                          |                   |            |             |                         |                                           |            |             |                 |                                           |                 |                                           |                   |                                           |               |                         |                   |                                |
| Baldo et al. 2010                 | IFN-α maintenance therapy + CT vs CT or obs            | Follicular lymphoma                    | 8       | 794/769                  | OS                | HR         | R           | 0.16                    | 0.82(0.63-1.08)                           | 52(0.04)   | 0/6/2       | 0.008           | 0.79(0.66-0.94)                           | 0.158           | 0.82(0.63-1.08)                           | N                 | 52.58(0.039)                              | (0.39-1.73)   | <b>0.51</b>             | NA                | No association                 |
|                                   |                                                        |                                        | 6       | 686/671                  | PFS               | HR         | F           | <0.00001                | 0.66(0.57-0.77)                           | 67.4(0.08) | 0/3/3       | <0.001          | 0.66(0.57-0.77)                           | <0.001          | 0.65(0.54-0.79)                           | N                 | 30.84(0.204)                              | (0.42-1.02)   | <b>0.14</b>             | p > 0.1           | Suggestive                     |
|                                   |                                                        |                                        | 3       | 273/266                  | Response rate     | RR         | R           | 0.19                    | 1.12(0.95-1.33)                           | 75(0.02)   | 0/2/1       | 0.073           | 1.07(0.99-1.14)                           | 0.159           | 1.12(0.96-1.31)                           | Y                 | 70.35(0.034)                              | (0.19-6.53)   | <b>0.41</b>             | p > 0.1           | No association                 |
| <b>Non-small cell lung cancer</b> |                                                        |                                        |         |                          |                   |            |             |                         |                                           |            |             |                 |                                           |                 |                                           |                   |                                           |               |                         |                   |                                |
| Rossi et al. 2010                 | IFN-α maintenance or consolidation therapy vs p or obs | NSCLC                                  | 4       | 253/235                  | OS                | HR         | F           | 0.02                    | 0.78(0.64-0.96)                           | 0(0.54)    | 0/3/1       | 0.016           | 0.78(0.64-0.96)                           | 0.016           | 0.78(0.64-0.96)                           | Y                 | 0(0.538)                                  | (0.50-1.22)   | <b>0.51</b>             | p > 0.1           | Suggestive                     |
|                                   |                                                        |                                        | 2       | 78/80                    | PFS               | HR         | F           | 0.32                    | 0.84(0.59-1.19)                           | 36.1(0.21) | 0/2/0       | 0.319           | 0.84(0.59-1.19)                           | 0.355           | 0.78(0.46-1.32)                           | Y                 | 36.36(0.21)                               | -             | -                       | p > 0.1           | No association                 |
| <b>Renal cell carcinoma</b>       |                                                        |                                        |         |                          |                   |            |             |                         |                                           |            |             |                 |                                           |                 |                                           |                   |                                           |               |                         |                   |                                |
| Canil et al. 2010                 | IFN-α vs CT                                            | Inoperable RCC, metastatic or advanced | 6       | 472/475                  | Mortality         | HR         | R           | 0.001                   | 0.79(0.69-0.91)                           | 1.6(0.41)  | 0/4/2       | 0.001           | 0.79(0.69-0.91)                           | 0.001           | 0.79(0.69-0.91)                           | Y                 | 4.35(0.389)                               | (0.64-0.99)   | <b>0.65</b>             | p > 0.1           | Suggestive                     |
|                                   |                                                        |                                        | 7       | 493/496                  | Response          | OR         | R           | <0.00001                | 6.87 (3.29-14.35)                         | 0(0.64)    | 0/3/4       | <0.001          | 6.87 (3.29-14.35)                         | <0.001          | 6.87 (3.29-14.35)                         | Y                 | 0(0.651)                                  | (2.61-18.05)  | <b>0.47</b>             | p > 0.1           | Suggestive                     |
| Unverzagt et al. 2017             | IFN-α monotherapy vs standard targeted therapy         | Metastatic RCC                         | 2       | 582/584                  | OS                | HR         | R           | 0.001                   | 1.28(1.11-1.49) (Control therapy favored) | 0% (0.46)  | 1/1/0       | 0.001           | 1.28(1.10-1.49) (Control therapy favored) | 0.001           | 1.28(1.10-1.49) (Control therapy favored) | N                 | 0(0.453)                                  | -             | -                       | p > 0.1           | Weak (Control therapy favored) |
|                                   |                                                        |                                        | 2       | 582/584                  | 1-year mortality  | RR         | R           | 0.00033                 | 1.30(1.13-1.51) (Control therapy favored) | 0% (0.68)  | 1/1/0       | <0.001          | 1.30(1.13-1.51) (Control therapy favored) | <0.001          | 1.30(1.13-1.51) (Control therapy favored) | N                 | 0(0.698)                                  | -             | -                       | p > 0.1           | Weak (Control therapy favored) |
|                                   |                                                        |                                        | 2       | 582/584                  | PFS               | HR         | R           | <0.00001                | 2.23(1.79-2.77) (Control therapy favored) | 0% (0.38)  | 2/0/0       | <0.001          | 2.23(1.79-2.77) (Control therapy favored) | <0.001          | 2.23(1.79-2.77) (Control therapy favored) | N                 | 0(0.376)                                  | -             | -                       | p > 0.1           | Weak (Control therapy favored) |
|                                   |                                                        |                                        | 2       | 480/527                  | Tumor remission   | RR         | R           | 0.011                   | 0.30(0.12-0.75) (Control therapy favored) | 73% (0.05) | 1/1/0       | <0.001          | 0.37 (Control therapy favored)            | 0.010           | 0.25(0.16-0.37) (Control therapy favored) | 0.010             | 0.30(0.12-0.75) (Control therapy favored) | N             | 73.27(0.053)            | -                 | -                              |
| <b>Interleukin-2</b>              |                                                        |                                        |         |                          |                   |            |             |                         |                                           |            |             |                 |                                           |                 |                                           |                   |                                           |               |                         |                   |                                |
| <b>Colorectal cancer</b>          |                                                        |                                        |         |                          |                   |            |             |                         |                                           |            |             |                 |                                           |                 |                                           |                   |                                           |               |                         |                   |                                |

| Author, year                                        | Comparison                                    | Cancer type                                        | RC T N. | Interven - tion /control | Outcome                  | Me t- rics | M * p-Value | Reporte d p-Value * | Reported SE (95% CI) * | Reported I2(%) (p-Value) * | R/N/S † | F p-Value § | F SE (95% CI) § | R p-Value § | R SE (95% CI) § | C ‡ | I2(%) (p-Value) § | 95% Prediction Interval | Egger p-Value | Exces s Signif i- cance | Level of Evidence |
|-----------------------------------------------------|-----------------------------------------------|----------------------------------------------------|---------|--------------------------|--------------------------|------------|-------------|---------------------|------------------------|----------------------------|---------|-------------|-----------------|-------------|-----------------|-----|-------------------|-------------------------|---------------|-------------------------|-------------------|
| Roviello et al. 2016                                | IL-2 + CTx vs CTx                             | Colorectal cancer                                  | 4       | 153/150                  | Objective response       | RR         | F           | 0.005               | 1.60(1.15-2.22)        | 0(0.70)                    | 0/3/1   | 0.003       | 1.65(1.19-2.28) | 0.003       | 1.65(1.19-2.28) | N   | 0(0.709)          | (0.81-3.36)             | <b>0.60</b>   | p > 0.1                 | Suggestive        |
| <b>Acute myeloid leukemia</b>                       |                                               |                                                    |         |                          |                          |            |             |                     |                        |                            |         |             |                 |             |                 |     |                   |                         |               |                         |                   |
| Buyse et al. 2011                                   | IL-2 remission maintenance monotherapy vs obs | Acute myeloid leukemia                             | 6       | 725/730                  | OS                       | HR         | Mixed       | 0.458               | 1.06(0.91-1.24)        | NA (0.524)                 | 0/6/0   | 0.843       | 1.01(0.95-1.06) | 0.843       | 1.01(0.95-1.06) | Y   | 0(0.821)          | (0.93-1.09)             | <b>0.39</b>   | p > 0.1                 | No association    |
|                                                     |                                               | Acute myeloid leukemia in first complete remission | 6       | 725/730                  | Leukemia-free survival   | HR         | Mixed       | 0.524               | 0.96(0.84-1.10)        | NA (0.741)                 | 0/6/0   | 0.624       | 0.99(0.95-1.03) | 0.624       | 0.99(0.95-1.03) | Y   | 0(0.613)          | (0.94-1.05)             | <b>0.48</b>   | p > 0.1                 | No association    |
| Mao et al. 2015                                     | IL-2 remission maintenance monotherapy vs obs | Acute myeloid leukemia in first complete remission | 5       | 672/683                  | OS                       | HR         | R           | 0.35                | 1.05(0.95-1.16)        | 0(0.53)                    | 0/5/0   | 0.347       | 1.05(0.95-1.16) | 0.347       | 1.05(0.95-1.16) | Y   | 0(0.53)           | (0.89-1.24)             | <b>0.39</b>   | NA                      | No association    |
|                                                     |                                               | Acute myeloid leukemia in first complete remission | 6       | 712/714                  | Disease-free survival    | HR         | R           | 0.37                | 0.95(0.86-1.06)        | 0(0.78)                    | 0/6/0   | 0.347       | 0.95(0.86-1.05) | 0.347       | 0.95(0.86-1.05) | Y   | 0(0.783)          | (0.82-1.10)             | <b>0.66</b>   | NA                      | No association    |
| <b>Melanoma</b>                                     |                                               |                                                    |         |                          |                          |            |             |                     |                        |                            |         |             |                 |             |                 |     |                   |                         |               |                         |                   |
| Hamm et al. 2008                                    | IL-2 + IFN-α + CTx vs CTx                     | Metastatic malignant melanoma                      | 5       | 364/365                  | OS                       | HR         | R           | 0.64                | 0.95(0.78-1.17)        | 27.3(0.24)                 | 0/5/0   | 0.475       | 0.94(0.80-1.11) | 0.642       | 0.95(0.78-1.16) | Y   | 26.11(0.247)      | (0.59-1.55)             | <b>0.09</b>   | NA                      | No association    |
|                                                     |                                               |                                                    | 6       | 568/566                  | Overall response         | RR         | R           | <0.0001             | 1.52(1.24-1.87)        | 0(0.69)                    | 0/5/1   | <0.001      | 1.52(1.24-1.87) | <0.001      | 1.52(1.24-1.87) | N   | 0(0.691)          | (1.14-2.04)             | <b>0.19</b>   | p > 0.1                 | Suggestive        |
|                                                     |                                               |                                                    | 3       | 250/253                  | Disease progression rate | HR         | R           | 0.06                | 0.80(0.63-1.01)        | 35.7(0.21)                 | 0/2/1   | 0.013       | 0.79(0.65-0.95) | 0.058       | 0.80(0.63-1.01) | N   | 36.81(0.205)      | (0.09-7.42)             | <b>0.23</b>   | NA                      | No association    |
| Ives et al. 2007                                    | IL-2 + IFN-α + CTx vs CTx                     | Metastatic melanoma                                | 7       | 607/599                  | OS                       | OR         | NA          | 0.9                 | 0.99(0.87-1.13)        | NA (0.2)                   | 0/7/0   | 0.576       | 1.08(0.82-1.44) | 0.729       | 1.07(0.74-1.55) | N   | 35.66(0.156)      | (0.46-2.50)             | <b>0.96</b>   | p > 0.1                 | No association    |
|                                                     |                                               |                                                    | 7       | 527/564                  | Overall response         | OR         | NA          | 0.0001              | 0.58(0.44-0.77)        | NA (0.5)                   | 0/6/1   | <0.001      | 0.58(0.44-0.77) | <0.001      | 0.58(0.44-0.77) | N   | 33(0.176)         | (0.40-0.84)             | <b>0.17</b>   | p > 0.1                 | Suggestive        |
|                                                     |                                               |                                                    | 7       | 527/564                  | Complete response        | OR         | NA          | 0.8                 | 0.93(0.52-1.65)        | NA (0.5)                   | 0/7/0   | 0.880       | 0.95(0.52-1.75) | 0.880       | 0.95(0.52-1.75) | N   | 0(0.517)          | (0.43-2.12)             | <b>0.24</b>   | p > 0.1                 | No association    |
|                                                     |                                               |                                                    | 7       | 527/564                  | Partial response         | OR         | NA          | 0.00007             | 0.55(0.41-0.74)        | NA (0.6)                   | 0/4/3   | <0.001      | 0.55(0.41-0.74) | <0.001      | 0.55(0.41-0.74) | Y   | 12.54(0.334)      | (0.37-0.82)             | <b>0.08</b>   | p > 0.1                 | Weak              |
| Sasse et al. 2013                                   | IL-2 + IFN-α + CTx vs CTx                     | Metastatic malignant melanoma                      | 4       | 417/412                  | OS                       | pet OR     | F           | 0.76                | 0.96(0.74-1.24)        | 32(0.22)                   | 0/4/0   | 0.718       | 1.06(0.76-1.49) | 0.547       | 1.17(0.70-1.94) | Y   | 37.21(0.189)      | (0.19-7.29)             | <b>0.44</b>   | p > 0.1                 | No association    |
|                                                     |                                               |                                                    | 6       | 400/395                  | 1-year survival          | RR         | R           | 0.8                 | 0.97(0.79-1.20)        | 42(0.13)                   | 2/4/0   | 0.920       | 0.99(0.85-1.16) | 0.801       | 0.97(0.79-1.20) | Y   | 41.86(0.126)      | (0.56-1.68)             | <b>0.18</b>   | p > 0.1                 | No association    |
|                                                     |                                               |                                                    | 5       | 365/365                  | 2-year survival          | RR         | R           | 0.86                | 0.97(0.65-1.43)        | 32(0.21)                   | 0/5/0   | 0.978       | 1.00(0.74-1.36) | 0.864       | 0.97(0.65-1.43) | Y   | 31.76(0.21)       | (0.35-2.65)             | <b>0.23</b>   | p > 0.1                 | No association    |
|                                                     |                                               |                                                    | 7       | 536/367                  | Overall response         | RR         | F           | 0.00023             | 1.46(1.19-1.79)        | 0.0(0.59)                  | 0/6/1   | <0.001      | 1.46(1.19-1.79) | <0.001      | 1.46(1.19-1.79) | N   | 0(0.592)          | (1.12-1.90)             | <b>0.03</b>   | p > 0.1                 | Weak              |
| <b>Renal cell carcinoma</b>                         |                                               |                                                    |         |                          |                          |            |             |                     |                        |                            |         |             |                 |             |                 |     |                   |                         |               |                         |                   |
| Hotte et al. 2007                                   | IL-2 based regimen + CTx vs CT or IFN         | Unresectable or metastatic RCC                     | 2       | 319/100                  | 1-year mortality         | RR         | R           | 0.003               | 0.56(0.38-0.82)        | 21.0(0.26)                 | 0/0/2   | 0.001       | 0.57(0.42-0.79) | 0.003       | 0.56(0.38-0.82) | Y   | 19.15(0.266)      | -                       | -             | p > 0.1                 | Weak              |
|                                                     | IL-2 based regimen without CTx vs CT or IFN   | Unresectable or metastatic RCC                     | 4       | 417/262                  | 1-year mortality         | RR         | R           | 0.06                | 1.20(1.00-1.44)        | 0(0.81)                    | 0/4/0   | 0.056       | 1.20(1.00-1.44) | 0.056       | 1.20(1.00-1.44) | Y   | 0(0.818)          | (0.80-1.79)             | <b>0.57</b>   | p > 0.1                 | No association    |
| <b>Solid tumor</b>                                  |                                               |                                                    |         |                          |                          |            |             |                     |                        |                            |         |             |                 |             |                 |     |                   |                         |               |                         |                   |
| Roviello et al. 2017                                | IL-2 + CTx vs CTx                             | NSCLC or head-and-neck cancer                      | 4       | 181/174                  | Objective response       | RR         | F           | 0.24                | 1.24(0.87-1.77)        | 0(0.45)                    | 0/4/0   | 0.460       | 1.12(0.83-1.52) | 0.460       | 1.12(0.83-1.52) | Y   | 0(0.524)          | (0.58-2.17)             | <b>0.12</b>   | p > 0.1                 | No association    |
| <b>Other interferons or cytokines not specified</b> |                                               |                                                    |         |                          |                          |            |             |                     |                        |                            |         |             |                 |             |                 |     |                   |                         |               |                         |                   |
| <b>Small-cell lung cancer</b>                       |                                               |                                                    |         |                          |                          |            |             |                     |                        |                            |         |             |                 |             |                 |     |                   |                         |               |                         |                   |

| Author, year                | Comparison                                             | Cancer type                    | RC T N. | Interven - tion /control | Outcome                      | Me t- rics | M *<br>p-Value | Reporte d<br>SE (95% CI)<br>* | Reported I2(%)<br>(p-Value) * | R/N/S †   | F p-Value § | F SE (95% CI) § | R p-Value §            | R SE (95% CI) § | C ‡<br>(p-Value) §     | I2(%)<br>(p-Value) § | 95% Prediction Interval | Egger p-Value      | Exces s Signif i- cance | Level of Evidence |                |
|-----------------------------|--------------------------------------------------------|--------------------------------|---------|--------------------------|------------------------------|------------|----------------|-------------------------------|-------------------------------|-----------|-------------|-----------------|------------------------|-----------------|------------------------|----------------------|-------------------------|--------------------|-------------------------|-------------------|----------------|
| Rossi et al. 2010           | IFN-γ maintenance or consolidation therapy vs p or obs | Small-cell lung cancer         | 2       | 116/111                  | OS                           | HR         | F              | 0.54                          | 1.09(0.82-1.46)               | 0(0.60)   | 0/2/0       | 0.538           | 1.09(0.82-1.46)        | 0.538           | 1.09(0.82-1.46)        | N                    | 0(0.61)                 | -                  | -                       | p > 0.1           | No association |
|                             |                                                        |                                | 2       | 116/111                  | PFS                          | HR         | F              | 0.96                          | 1.01(0.75-1.34)               | 0(0.45)   | 0/2/0       | 0.945           | 1.01(0.76-1.35)        | 0.945           | 1.01(0.76-1.35)        | Y                    | 0(0.453)                | -                  | -                       | p > 0.1           | No association |
| <b>Renal cell carcinoma</b> |                                                        |                                |         |                          |                              |            |                |                               |                               |           |             |                 |                        |                 |                        |                      |                         |                    |                         |                   |                |
| Scherr et al. 2011          | Adjuvant IL-2 or interferon vs p or obs                | Locally advanced, operated RCC | 3       | 420/420                  | OS                           | HR         | F              | 0.23                          | 1.18(0.90-1.56)               | 0(0.48)   | 0/3/0       | 0.133           | 1.16(0.96-1.41)        | 0.133           | 1.16(0.96-1.41)        | Y                    | 0(0.56)                 | (0.33-4.14)        | <b>0.21</b>             | p > 0.1           | No association |
|                             |                                                        |                                | 3       | 420/420                  | PFS                          | HR         | F              | 0.48                          | 1.13(0.80-1.60)               | 40(0.19)  | 0/3/0       | 0.359           | 1.13(0.87-1.47)        | 0.491           | 1.13(0.80-1.59)        | Y                    | 40.52(0.186)            | (0.04-31.18)       | <b>0.96</b>             | NA                | No association |
| Massari et al. 2013         | Adjuvant IL-2 or interferon vs p or obs                | Resected RCC                   | 5       | 1174 total               | 2-year OS                    | RR         | R              | 0.059                         | 1.24(0.99-1.55)               | NA (0.55) | 0/5/0       | 0.059           | 1.24(0.99-1.55)        | 0.059           | 1.24(0.99-1.55)        | Y                    | 0(0.555)                | (0.86-1.78)        | <b>0.40</b>             | NA                | No association |
|                             |                                                        |                                | 5       | 1174 total               | 2-year relapse-free survival | RR         | R              | 0.522                         | 1.05(0.90-1.22)               | NA (0.46) | 0/5/0       | 0.521           | 1.05(0.90-1.22)        | 0.521           | 1.05(0.90-1.22)        | Y                    | 0(0.467)                | (0.82-1.34)        | <b>0.56</b>             | NA                | No association |
|                             |                                                        |                                | 5       | 1241 total               | 5-year OS                    | RR         | R              | 0.415                         | 1.09(0.88-1.35)               | NA (0.09) | 1/4/0       | 0.351           | 1.07(0.93-1.22)        | 0.416           | 1.09(0.88-1.35)        | Y                    | 50.33(0.09)             | (0.58-2.07)        | <b>0.52</b>             | NA                | No association |
|                             |                                                        |                                | 5       | 1352 total               | 5-year relapse-free survival | RR         | R              | <b>0.428</b>                  | <b>1.06(0.92-1.21)</b>        | NA (0.29) | 0/5/0       | <b>0.427</b>    | <b>1.05(0.93-1.18)</b> | <b>0.426</b>    | <b>1.06(0.92-1.20)</b> | Y                    | <b>18.36(0.298)</b>     | <b>(0.78-1.42)</b> | <b>0.39</b>             | NA                | No association |

Abbreviations: RCT, randomized controlled trial; N., number; SE, standard effect; CI, confidence interval; M, model; F, fixed effect; R, random effect; NA, not available; C, concordance with largest study; Y, concordant with largest study; N, not concordant with largest study; OS, overall survival; PFS progression-free survival; RR, risk ratio; HR, hazard ratio; OR, odds ratio; IFN-α, interferon alpha; 5FU, fluorouracil; IFN, interferon; p, placebo; CTx, chemotherapy; CT, conventional therapy; obs, observation; VAX, cancer vaccine; IL-2, interleukin; IFN-γ, interferon gamma; AT, adjuvant therapy; HCC, hepatocellular carcinoma; NSCLC, non-small cell lung cancer; RCC, renal cell carcinoma. \* Value reported in original article of the meta-analysis. † Number of individual studies of effect size with statistical significance in the reverse direction/not statistically significant/statistically significant. ‡ Concordance of fixed and random effects summary outcome with outcome of largest individual study. § Value obtained from re-analysis of original meta-analysis. ES is estimated by assuming power of each study could be replaced by power of the study with most cases and controls. All p-Values are two-sided.

**Table S6.** Umbrella review summary and level of evidence reported in meta-analyses of cancer therapeutic vaccines.

| Author, year        | Comparison   | Cancer type       | RC T N. | Interven - tion /control | Outcome     | Me t- rics | M *<br>p-Value | Reporte d<br>SE (95% CI)<br>* | Reported I2(%)<br>(p-Value) * | R/N/S † | F p-Value § | F SE (95% CI) § | R p-Value §      | R SE (95% CI) § | C ‡<br>(p-Value) § | I2(%)<br>(p-Value) § | 95% Prediction Interval | Egger p-Value | Exces s Signif i- cance | Level of Evidence |                |
|---------------------|--------------|-------------------|---------|--------------------------|-------------|------------|----------------|-------------------------------|-------------------------------|---------|-------------|-----------------|------------------|-----------------|--------------------|----------------------|-------------------------|---------------|-------------------------|-------------------|----------------|
| <b>Sipuleucel-T</b> |              |                   |         |                          |             |            |                |                               |                               |         |             |                 |                  |                 |                    |                      |                         |               |                         |                   |                |
| <b>Glioma</b>       |              |                   |         |                          |             |            |                |                               |                               |         |             |                 |                  |                 |                    |                      |                         |               |                         |                   |                |
| Cao et al. 2014     | DC vs non-DC | High-grade glioma | 2¶      | 43/41                    | 1-year OS   | OR         | -              | -                             | -                             | 0/3/0   | 0.096       | 2.43(0.85-6.93) | 0.096            | 2.43(0.85-6.93) | Y                  | 0(0.848)             | (0.00-2157.51)          | <b>0.27</b>   | p > 0.1                 | No association    |                |
|                     |              |                   | 3¶      | 25/25                    | 1.5-year OS | OR         | -              | -                             | -                             | -       | 0/2/0       | 0.067           | 3.24(0.92-11.41) | 0.067           | 3.24(0.92-11.41)   | Y                    | 0(0.692)                | -             | -                       | p > 0.1           | No association |
|                     |              |                   | 3¶      | 44/42                    | 2-year OS   | OR         | -              | -                             | -                             | -       | 0/3/0       | 0.038           | 3.41(1.07-10.81) | 0.038           | 3.41(1.07-10.81)   | N                    | 0(0.974)                | -             | -                       | p > 0.1           | Weak           |

| Author, year                      | Comparison                                                                                             | Cancer type                          | RC T N. | Interven - tion /control | Outcome                      | Me t- rics | M * p-Value | Reporte d SE (95% CI) * | Reported I2(%) (p-Value) * | R/N/S †     | F p-Value § | F SE (95% CI) § | R p-Value §     | R SE (95% CI) § | C ‡             | I2(%) (p-Value) § | 95% Prediction Interval | Egger p-Value | Exces s Signif i- cance | Level of Evidence |                |
|-----------------------------------|--------------------------------------------------------------------------------------------------------|--------------------------------------|---------|--------------------------|------------------------------|------------|-------------|-------------------------|----------------------------|-------------|-------------|-----------------|-----------------|-----------------|-----------------|-------------------|-------------------------|---------------|-------------------------|-------------------|----------------|
| <b>Prostate cancer</b>            |                                                                                                        |                                      |         |                          |                              |            |             |                         |                            |             |             |                 |                 |                 |                 |                   |                         |               |                         |                   |                |
| Kawalec et al. 2012               | Sipuleucel-T vs p                                                                                      | Castration-resistant prostate cancer | 3       | 488/249                  | OS                           | HR         | F           | 0.001                   | 0.73(0.61-0.88)            | 0(0.49)     | 0/1/2       | 0.001           | 0.73(0.60-0.88) | <0.001          | 0.73(0.6-0.88)  | Y                 | 0(0.465)                | (0.22-2.44)   | <b>0.71</b>             | p > 0.1           | Suggestive     |
|                                   |                                                                                                        |                                      | 3       | 488/249                  | Time to progression          | HR         | F           | 0.17                    | 0.89(0.75-1.05)            | 6(0.35)     | 0/3/0       | 0.165           | 0.89(0.75-1.05) | 0.170           | 0.88(0.74-1.05) | Y                 | 3.94(0.353)             | (0.26-3.02)   | <b>0.57</b>             | p > 0.1           | No association |
| <b>Other cancer vaccines</b>      |                                                                                                        |                                      |         |                          |                              |            |             |                         |                            |             |             |                 |                 |                 |                 |                   |                         |               |                         |                   |                |
| <b>Non-small cell lung cancer</b> |                                                                                                        |                                      |         |                          |                              |            |             |                         |                            |             |             |                 |                 |                 |                 |                   |                         |               |                         |                   |                |
| Ding et al. 2014                  | VAX(Tecemotide or EGF vaccine or SRL172 or TG4010 or MAGE-A3 or L-BLP25) vs CTx or obs or α-tocopherol | NSCLC                                | 6       | 1363/876                 | OS                           | OR         | F           | 0.0002                  | 0.83(0.76-0.91)            | 0(0.67)     | 0/4/2       | 0.001           | 0.56(0.39-0.79) | 0.001           | 0.56(0.39-0.79) | Y                 | 64.95(0.014)            | (0.34-0.92)   | <b>0.99</b>             | p > 0.1           | Weak           |
| Wang et al. 2015                  | VAX vs CTx or p or obs                                                                                 | NSCLC                                | 7       | 1332/954                 | 1-year OS                    | OR         | F           | 0.0004                  | 1.65(1.25-2.18)            | 31(0.19)    | 0/5/2       | <0.001          | 1.51(1.24-1.83) | <0.001          | 1.65(1.25-2.18) | N                 | 56.05(0.034)            | (0.87-3.13)   | <b>0.06</b>             | p > 0.1           | Weak           |
|                                   |                                                                                                        |                                      | 3       | 1004/582                 | 2-year OS                    | OR         | F           | 0.03                    | 1.64(1.04-2.59)            | 48(0.14)    | 0/2/1       | 0.004           | 1.40(1.11-1.76) | 0.033           | 1.64(1.04-2.59) | N                 | 52.43(0.122)            | (0.02-175.81) | <b>0.06</b>             | p > 0.1           | Weak           |
|                                   |                                                                                                        |                                      | 2       | 917/493                  | 3-year OS                    | OR         | R           | 0.19                    | 1.69(0.78-3.65)            | 80(0.03)    | 0/1/1       | 0.020           | 1.36(1.05-1.76) | 0.186           | 1.69(0.78-3.65) | N                 | 74.32(0.048)            | -             | -                       | p > 0.1           | No association |
|                                   |                                                                                                        |                                      | 4       | 446/403                  | Objective response           | OR         | F           | 0.05                    | 1.37(0.99-1.90)            | 15(0.32)    | 0/3/1       | 0.041           | 1.35(1.01-1.79) | 0.054           | 1.37(0.99-1.90) | N                 | 26.32(0.254)            | (0.55-3.41)   | <b>0.21</b>             | p > 0.1           | No association |
| Yu et al. 2017                    | VAX vs CTx or p                                                                                        | Advanced NSCLC                       | 3       | 1014/595                 | PFS                          | OR         | R           | 0.01                    | 1.31(1.05-1.63)            | 0(0.78)     | 0/1/2       | 0.015           | 1.31(1.05-1.63) | 0.015           | 1.31(1.05-1.63) | Y                 | 48.77(0.142)            | (0.32-5.33)   | <b>0.62</b>             | p > 0.1           | Suggestive     |
| Zhou et al. 2016                  | VAX(EGF vaccine or BLP-25 or TG4010, etc) vs CTx                                                       | Advanced NSCLC                       | 4       | 300/302                  | OS                           | HR         | R           | NA                      | 0.76(0.60-0.92)            | 0.0(0.821)  | 0/4/0       | 0.012           | 0.77(0.63-0.94) | 0.012           | 0.77(0.63-0.94) | N                 | 0(0.796)                | (0.50-1.20)   | <b>0.55</b>             | p > 0.1           | Weak           |
|                                   | VAX(EGF vaccine or BLP-25 or TG4010, etc) vs p                                                         | Advanced NSCLC                       | 5       | 1314/884                 | OS                           | HR         | R           | NA                      | 0.81(0.71-0.91)            | 25.6(0.251) | 0/4/1       | 0.001           | 0.83(0.75-0.92) | 0.002           | 0.83(0.74-0.93) | N                 | 16.86(0.307)            | (0.64-1.07)   | <b>0.20</b>             | p > 0.1           | Suggestive     |
| <b>Renal cell carcinoma</b>       |                                                                                                        |                                      |         |                          |                              |            |             |                         |                            |             |             |                 |                 |                 |                 |                   |                         |               |                         |                   |                |
| Massari et al. 2013               | Adjuvant VAX vs no AT                                                                                  | Resected RCC                         | 2       | 673 total                | 5-year relapse-free survival | RR         | R           | 0.765                   | 0.91(0.50-1.66)            | NA (0.055)  | 0/1/1       | 0.077           | 0.80(0.63-1.02) | 0.765           | 0.91(0.50-1.66) | N                 | 75.99(0.041)            | -             | -                       | NA                | No association |
| Scherr et al. 2011                | Adjuvant VAX vs p or obs                                                                               | Locally advanced, operated RCC       | 2       | 421/427                  | OS                           | HR         | F           | 0.89                    | 1.02(0.75-1.39)            | 0(0.42)     | 0/2/0       | 0.765           | 1.04(0.80-1.35) | 0.765           | 1.04(0.80-1.35) | Y                 | 0(0.452)                | -             | -                       | p > 0.1           | No association |
|                                   |                                                                                                        |                                      | 2       | 421/427                  | PFS                          | HR         | F           | 0.68                    | 0.95(0.76-1.19)            | 0(0.35)     | 0/2/0       | 0.667           | 0.95(0.76-1.19) | 0.667           | 0.95(0.76-1.19) | Y                 | 0(0.347)                | -             | -                       | NA                | No association |
| Unverzagt et al. 2017             | VAX + CT vs CT                                                                                         | Metastatic RCC                       | 2       | 569/502                  | OS                           | HR         | R           | 0.14                    | 1.14(0.96-1.37)            | 22(0.26)    | 0/2/0       | 0.137           | 1.15(0.96-1.37) | 0.174           | 1.16(0.94-1.43) | Y                 | 21.92(0.258)            | -             | -                       | NA                | No association |
|                                   |                                                                                                        |                                      | 2       | 546/488                  | 1-year mortality             | RR         | R           | 0.34                    | 1.10(0.91-1.32)            | 0.0(0.43)   | 0/0/2       | 0.339           | 1.10(0.91-1.32) | 0.339           | 1.10(0.91-1.32) | N                 | 0(0.428)                | -             | -                       | p > 0.1           | No association |
|                                   |                                                                                                        |                                      | 2       | 569/502                  | Tumour remission             | RR         | R           | 0.45                    | 0.93(0.76-1.13)            | 0.0(0.78)   | 0/2/0       | 0.451           | 0.93(0.76-1.13) | 0.451           | 0.93(0.76-1.13) | Y                 | 0(0.787)                | -             | -                       | <b>0.1</b>        | p > 0.1        |

Abbreviations: RCT, randomized controlled trial; N., number; SE, standard effect; CI, confidence interval; M, model; F, fixed effect; R, random effect; NA, not available; C, concordance with largest study; Y, concordant with largest study; N, not concordant with largest study; OS, overall survival; PFS progression-free survival; RR, risk ratio; HR, hazard ratio; OR, odds ratio; DC, dendritic cell based vaccine; P, placebo; VAX, cancer vaccine; CTx, chemotherapy; obs, observation; P, placebo; AT, adjuvant therapy; CT, conventional therapy; NSCLC, non-small cell lung cancer; RCC, renal cell carcinoma. \* Value reported in original article of the meta-analysis. † Number of individual studies of effect size with statistical significance in the reverse direction/not statistically significant/statistically significant.

‡ Concordance of fixed and random effects summary outcome with outcome of largest individual study. § Value obtained from re-analysis of original meta-analysis. Re-analysis was performed after excluding non-RCTs from original meta-analysis. All *p*-Values are two-sided.

**Table S7.** Umbrella review summary and level of evidence reported in meta-analyses of uncategorized immunotherapy.

| Author, year                      | Comparison                                                                                  | Cancer type         | RC T N. | Interven- tion /control | Outcome            | Me- t- rics | M *<br>p-Value * | Reporte- d<br>p-Value * | Reported SE(95% CI) * | Reported I2(%) (p-Value) * | R/N/S † | F p-Value § | F SE (95% CI) § | R p-Value § | R SE (95% CI) § | C ‡ (p-Value) § | I2(%) (p-Value) § | 95% Prediction Interval | Egger p-Value | Exces- s Signif- icance | Level of Evidence |
|-----------------------------------|---------------------------------------------------------------------------------------------|---------------------|---------|-------------------------|--------------------|-------------|------------------|-------------------------|-----------------------|----------------------------|---------|-------------|-----------------|-------------|-----------------|-----------------|-------------------|-------------------------|---------------|-------------------------|-------------------|
| <b>Hepatocellular carcinoma</b>   |                                                                                             |                     |         |                         |                    |             |                  |                         |                       |                            |         |             |                 |             |                 |                 |                   |                         |               |                         |                   |
| Zhu et al. 2015                   | Adjuvant immunotherapy vs no AT with backbone curative resection                            | HCC                 | 2       | 160/117                 | 1-year OS          | HR          | R                | NA                      | 1.51(0.47-4.90)       | NA                         | 0/2/0   | 0.186       | 1.04(0.98-1.10) | 0.186       | 1.04(0.98-1.10) | Y               | 0(0.688)          | -                       | -             | <i>p</i> > 0.1          | No association    |
|                                   |                                                                                             |                     | 2       | 160/117                 | 5-year OS          | HR          | R                | NA                      | 1.05(0.64-1.73)       | NA                         | 0/2/0   | 0.849       | 1.03(0.75-1.42) | 0.849       | 1.03(0.75-1.42) | Y               | 0(0.895)          | -                       | -             | <i>p</i> > 0.1          | No association    |
|                                   |                                                                                             |                     | 2       | 160/117                 | Overall recurrence | OR          | R                | NA                      | 0.30(0.15-0.63)       | NA                         | 0/0/2   | <0.001      | 0.31(0.18-0.53) | 0.001       | 0.30(0.15-0.63) | Y               | 81.57(0.02)       | -                       | -             | <i>p</i> > 0.1          | Weak              |
| <b>Melanoma</b>                   |                                                                                             |                     |         |                         |                    |             |                  |                         |                       |                            |         |             |                 |             |                 |                 |                   |                         |               |                         |                   |
| Wu et al. 2017                    | Additional mAB or VAX vs no additional therapy, with backbone therapy in both arms          | Metastatic melanoma | 3       | 1423 total              | OS                 | HR          | R                | NA                      | 0.89(0.74-1.05)       | 51.2(0.129)                | 0/2/1   | 0.054       | 0.89(0.80-1.00) | 0.222       | 0.90(0.75-1.07) | Y               | 54.47(0.111)      | (0.14-5.64)             | <b>0.98</b>   | NA                      | No association    |
|                                   |                                                                                             |                     | 4       | 2368 total              | PFS                | HR          | R                | NA                      | 0.88(0.63-1.13)       | 93.2(0.000)                | 0/3/1   | 0.003       | 0.90(0.83-0.96) | 0.280       | 0.86(0.66-1.13) | N               | 92.27(<0.001)     | (0.24-3.11)             | <b>0.56</b>   | NA                      | No association    |
|                                   |                                                                                             |                     | 4       | 2368 total              | Overall response   | RR          | R                | NA                      | 1.21(0.66-2.23)       | 85.6(0.000)                | 0/3/1   | <0.001      | 1.66(1.35-2.03) | 0.525       | 1.22(0.66-2.24) | N               | 85.38(<0.001)     | (0.08-19.49)            | <b>0.48</b>   | NA                      | No association    |
| <b>Non-small cell lung cancer</b> |                                                                                             |                     |         |                         |                    |             |                  |                         |                       |                            |         |             |                 |             |                 |                 |                   |                         |               |                         |                   |
| Dammeijer et al. 2016             | Immunotherapy (L-BLP25 or DC or CIK or DC/CIK or IL-2 or etc) without CTx vs CT or <i>p</i> | NSCLC               | 9       | 5033 total              | OS                 | HR          | R                | 0.01                    | 0.81(0.70-0.94)       | 43.9(NA)                   | 0/7/2   | <0.001      | 0.84(0.76-0.92) | 0.005       | 0.81(0.70-0.94) | N               | 42.53(0.084)      | (0.56-1.18)             | <b>0.15</b>   | NA                      | Weak              |
|                                   |                                                                                             |                     | 10      | 5164 total              | PFS                | HR          | R                | 0.006                   | 0.83(0.72-0.95)       | 57.7(NA)                   | 0/6/4   | 0.002       | 0.89(0.82-0.96) | 0.006       | 0.83(0.72-0.95) | N               | 57.02(0.013)      | (0.56-1.21)             | <b>0.01</b>   | NA                      | Weak              |
|                                   |                                                                                             |                     | 11      | 1519/1514               | OS                 | HR          | F                | 0.0007                  | 0.95(0.92-0.98)       | 0(0.45)                    | 0/10/1  | 0.002       | 0.96(0.93-0.98) | 0.002       | 0.96(0.93-0.98) | N               | 0(0.503)          | (0.93-0.99)             | <b>0.01</b>   | <i>p</i> < 0.1          | Weak              |
| Wang et al. 2012                  | Immunotherapy (IL-2 or CIK or DC/CIK or GM-CSF or trastuzumab or cetuximab or VAX) vs CT    | Advanced NSCLC      | 7       | 1159/1157               | PFS                | HR          | F                | 0.0004                  | 1.08(1.03-1.12)       | 32(0.19)                   | 0/6/1   | 0.005       | 1.06(1.02-1.10) | 0.058       | 1.05(1.00-1.10) | N               | 24.14(0.245)      | (0.95-1.16)             | <b>0.09</b>   | <i>p</i> > 0.1          | No association    |
|                                   |                                                                                             |                     | 10      | 1346/1341               | Overall response   | HR          | F                | 0.003                   | 1.19(1.06-1.34)       | 2(0.42)                    | 0/8/2   | 0.006       | 1.17(1.05-1.31) | 0.007       | 1.17(1.04-1.32) | Y               | 1.08(0.428)       | (1.01-1.35)             | <b>0.17</b>   | <i>p</i> > 0.1          | Suggestive        |
|                                   |                                                                                             |                     | 9       | 1303/1298               | Complete response  | HR          | F                | 0.97                    | 1.00(0.77-1.31)       | 0(0.74)                    | 0/9/0   | 0.851       | 1.02(0.79-1.33) | 0.851       | 1.02(0.79-1.33) | Y               | 0(0.739)          | (0.73-1.44)             | <b>0.27</b>   | <i>p</i> > 0.1          | No association    |
| Yu et al. 2017                    | mAB (anti-CTLA-4 or anti-PD-1/PD-L1 or VEGF-A) vs CTx or <i>p</i>                           | Advanced NSCLC      | 8       | 1215/1215               | Partial response   | HR          | F                | 0.002                   | 1.23(1.08-1.40)       | 1(0.42)                    | 0/6/2   | 0.003       | 1.22(1.07-1.39) | 0.004       | 1.22(1.06-1.39) | Y               | 0.48(0.425)       | (1.03-1.44)             | <b>0.22</b>   | <i>p</i> > 0.1          | Suggestive        |
|                                   |                                                                                             |                     | 9       | 2229/2215               | PFS                | OR          | R                | 0.0001                  | 2.05(1.42-2.94)       | 76 (<0.0001)               | 0/3/6   | <0.001      | 2.04(1.71-2.42) | <0.001      | 2.05(1.42-2.94) | N               | 90.38(<0.001)     | (0.61-6.84)             | <b>0.94</b>   | <i>p</i> > 0.1          | Suggestive        |
| Zhou et al. 2016                  | Immunomodulator talactoferrin vs <i>p</i>                                                   | Advanced NSCLC      | 2       | 544/298                 | OS                 | HR          | R                | NA                      | 0.88(0.52-1.24)       | 74.0(0.050)                | 0/2/0   | 0.841       | 0.98(0.83-1.16) | 0.553       | 0.88(0.58-1.34) | Y               | 66.92(0.082)      | -                       | -             | NA                      | No association    |
|                                   |                                                                                             |                     | 3       | 392/376                 | OS                 | HR          | R                | NA                      | 1.01(0.97-1.05)       | 0.0(0.582)                 | 0/3/0   | 0.587       | 1.01(0.97-1.05) | 0.587       | 1.01(0.97-1.05) | Y               | 0(0.569)          | (0.78-1.30)             | <b>0.97</b>   | NA                      | No association    |
|                                   | Ipilimumab or nivolumab or atezolizumab vs CTx                                              | Advanced NSCLC      | 3       | 571/570                 | OS                 | HR          | R                | NA                      | 0.69(0.59-0.80)       | 7.6(0.339)                 | 0/1/2   | <0.001      | 0.71(0.61-0.81) | <0.001      | 0.71(0.61-0.82) | Y               | 1.89(0.361)       | (0.27-1.86)             | <b>0.72</b>   | <i>p</i> > 0.1          | Suggestive        |



| Author, year                | Comparison                                                                                  | Cancer type             | RC T N. | Interven - tion /control | Outcome          | Me t- rics | M * p-Value | Reporte d p-Value * | Reported SE(95% CI) * | Reported I2(%) (p-Value) * | R/N/S † | F p-Value § | F SE (95% CI) § | R p-Value §            | R SE (95% CI) § | C ‡                    | I2(%) (p-Value) § | 95% Prediction Interval | Egger p-Value      | Exces s Signifi - cance | Level of Evidence |                |
|-----------------------------|---------------------------------------------------------------------------------------------|-------------------------|---------|--------------------------|------------------|------------|-------------|---------------------|-----------------------|----------------------------|---------|-------------|-----------------|------------------------|-----------------|------------------------|-------------------|-------------------------|--------------------|-------------------------|-------------------|----------------|
| <b>Renal cell carcinoma</b> |                                                                                             |                         |         |                          |                  |            |             |                     |                       |                            |         |             |                 |                        |                 |                        |                   |                         |                    |                         |                   |                |
| Bai et al. 2017             | Postsurgical AIT (IL-2 + IFN- $\alpha$ or IFN- $\alpha$ 2b or IFN- $\alpha$ , etc) vs no AT | Locally advanced RCC    | 5       | 941/902                  | OS               | HR         | F           | 0.345               | 1.08(0.92-1.28)       | 0.0(0.682)                 | 0/5/0   | 0.345       | 1.08(0.92-1.28) | 0.345                  | 1.08(0.92-1.28) | Y                      | 0(0.682)          | (0.83-1.42)             | <b>0.32</b>        | NA                      | No association    |                |
|                             |                                                                                             |                         | 5       | 941/902                  | DFS              | HR         | F           | 0.477               | 1.05(0.91-1.21)       | 6.6(0.369)                 | 0/5/0   | 0.477       | 1.05(0.91-1.21) | 0.459                  | 1.06(0.91-1.23) | Y                      | 6.6(0.369)        | (0.79-1.41)             | <b>0.40</b>        | NA                      | No association    |                |
| <b>Solid tumor</b>          |                                                                                             |                         |         |                          |                  |            |             |                     |                       |                            |         |             |                 |                        |                 |                        |                   |                         |                    |                         |                   |                |
| Wu et al. 2017              | Additional mAB or VAX vs no additional therapy with backbone therapy                        | Lung cancer or melanoma | 6¶      | 1936 total               | OS               | HR         | -           | -                   | -                     | -                          | 0/5/1   | 0.030       | 0.90(0.81-0.99) | 0.043                  | 0.90(0.81-1.00) | Y                      | 8.22(0.364)       | (0.74-1.08)             | <b>0.75</b>        | NA                      | Weak              |                |
|                             |                                                                                             |                         | 5¶      | 2547 total               | PFS              | HR         | -           | -                   | -                     | -                          | -       | 0/3/2       | <0.001          | 0.87(0.82-0.93)        | 0.122           | 0.84(0.67-1.05)        | N                 | 90.6(0)                 | (0.35-1.98)        | <b>0.38</b>             | NA                | No association |
|                             |                                                                                             |                         | 7¶      | 2881 total               | Overall response | RR         | -           | -                   | -                     | -                          | -       | 0/5/2       | <0.001          | <b>1.64(1.38-1.96)</b> | <b>0.076</b>    | <b>1.46(0.96-2.22)</b> | N                 | <b>78.05(0)</b>         | <b>(0.38-5.67)</b> | <b>0.37</b>             | NA                | No association |

Abbreviations: RCT, randomized controlled trial; N., number; SE, standard effect; CI, confidence interval; M, model; F, fixed effect; R, random effect; NA, not available; C, concordance with largest study; Y, concordant with largest study; N, not concordant with largest study; OS, overall survival; PFS progression-free survival; RR, risk ratio; HR, hazard ratio; OR, odds ratio; AT, adjuvant therapy; mAB, monoclonal antibodies; VAX, cancer vaccine; IL-2, interleukin-2; CIK, cytokine-induced killer cells; DC/CIK, dendritic cells with cytokine-induced killer cells; GM-CSF, Granulocyte-macrophage colony-stimulating factor; DC, dendritic cell; p, placebo; IFN, interferon; HCC, hepatocellular carcinoma; NSCLC, non-small cell lung cancer. \* Value reported in original article of the meta-analysis. † Number of individual studies of effect size with statistically significant in reverse direction/not statistically significant/statistically significant. ‡ Concordance of fixed and random effects summary outcome with outcome of largest individual study. § Value obtained from re-analysis of original meta-analysis. Re-analysis was performed after excluding non-RCTs from original meta-analysis. All p-Values are two-sided.

**Table S8.** Comparison between re-analyses of RCTs and re-analyses of RCTs plus non-RCT(s).

| Author, year     | Comparison                                                    | Cancer type                  | N. of studies | Types of studies               | Interven - tion /control | Outcome          | Me t- rics | M * p-Value | Reporte d p-Value * | Reported SE (95% CI) * | Reported I2(%) (p-Value) * | R/N/S † | F p-Value § | F SE (95% CI) § | R p-Value §     | R SE (95% CI) § | C ‡             | I2(%) (p-Value) § | 95% Prediction Interval | Egge r p-Value | Exces s Signifi - cance | Level of Evidence |                |
|------------------|---------------------------------------------------------------|------------------------------|---------------|--------------------------------|--------------------------|------------------|------------|-------------|---------------------|------------------------|----------------------------|---------|-------------|-----------------|-----------------|-----------------|-----------------|-------------------|-------------------------|----------------|-------------------------|-------------------|----------------|
| Yuan et al. 2017 | Postoperative ACI (CIK or LAK + IL-2 or lymphocytes) vs no AT | Pretreated HCC, not advanced | 6             | RCTs                           | 407/362                  | 1-year mortality | RR         | -           | -                   | -                      | -                          | 0/5/1   | 0.035       | 0.50(0.26-0.95) | 0.032           | 0.43(0.20-0.93) | N               | 17.93(0.297)      | (0.09-2.12)             | <b>0.01</b>    | p > 0.1                 | Weak              |                |
|                  |                                                               |                              | 8             | RCTs and retrospective studies | 1003/971                 | 1-year mortality | RR         | F           | <0.0001             | 0.64(0.52-0.79)        | 5(0.39)                    | 0/6/2   | <0.001      | 0.67(0.55-0.83) | 0.001           | 0.67(0.53-0.85) | Y               | 1.96(0.414)       | (0.48-0.93)             | <b>0.07</b>    | p > 0.1                 | Weak              |                |
|                  |                                                               |                              | 6             | RCTs                           | 407/362                  | 2-year mortality | RR         | -           | -                   | -                      | -                          | -       | 0/6/0       | 0.002           | 0.52(0.34-0.78) | 0.002           | 0.52(0.34-0.78) | N                 | 0(0.685)                | (0.29-0.93)    | <b>0.59</b>             | p > 0.1           | Weak           |
|                  |                                                               |                              | 8             | RCTs and retrospective studies | 1003/971                 | 2-year mortality | RR         | F           | <0.0000             | 0.72(0.63-0.83)        | 0(0.48)                    | 0/7/1   | <0.001      | 0.74(0.65-0.85) | <0.001          | 0.74(0.65-0.85) | Y               | 0(0.49)           | (0.62-0.87)             | <b>0.04</b>    | p > 0.1                 | Weak              |                |
|                  |                                                               |                              | 6             | RCTs                           | 407/362                  | 3-year mortality | RR         | -           | -                   | -                      | -                          | -       | 0/5/1       | 0.009           | 0.71(0.55-0.92) | 0.009           | 0.71(0.55-0.92) | N                 | 0(0.593)                | (0.49-1.02)    | <b>0.81</b>             | p > 0.1           | Suggestive     |
|                  |                                                               |                              | 8             | RCTs and retrospective studies | 1003/971                 | 3-year mortality | RR         | F           | <0.0000             | 0.73(0.65-0.81)        | 0(0.74)                    | 0/5/3   | <0.001      | 0.73(0.65-0.81) | <0.001          | 0.73(0.65-0.81) | Y               | 0(0.741)          | (0.63-0.84)             | <b>0.56</b>    | p > 0.1                 | Convincing        |                |
|                  |                                                               |                              | 2             | RCTs                           | 160/117                  | 5-year mortality | RR         | -           | -                   | -                      | -                          | -       | 0/2/0       | 0.920           | 0.99(0.83-1.19) | 0.920           | 0.99(0.83-1.19) | Y                 | 0(0.966)                | -              | -                       | p > 0.1           | No association |
|                  |                                                               |                              | 4             | RCTs and retrospective studies | 756/726                  | 5-year mortality | RR         | F           | 0.0005              | 0.86(0.79-0.94)        | 23(0.27)                   | 0/2/2   | 0.001       | 0.86(0.79-0.94) | 0.011           | 0.87(0.78-0.97) | Y               | 23.42(0.271)      | (0.62-1.22)             | <b>0.63</b>    | p > 0.1                 | Suggestive        |                |

| Author, year     | Comparison                                           | Cancer type                     | N. of studies | Types of studies                                | Intervention/control | Outcome                | Met-<br>rics    | M*<br>p-Value | Reported<br>SE (95% CI) | Reported<br>I2(%)<br>(p-Value) | R/N/S<br>†      | F<br>p-<br>Value<br>§ | F SE<br>(95% CI) § | R<br>p-<br>Value<br>§ | R SE<br>(95% CI) § | C‡              | I2(%)<br>(p-Value) § | 95%<br>Prediction<br>Interval | Edge<br>r p-<br>Value | Excess<br>Signifi-<br>cance | Level of<br>Evidence |                |
|------------------|------------------------------------------------------|---------------------------------|---------------|-------------------------------------------------|----------------------|------------------------|-----------------|---------------|-------------------------|--------------------------------|-----------------|-----------------------|--------------------|-----------------------|--------------------|-----------------|----------------------|-------------------------------|-----------------------|-----------------------------|----------------------|----------------|
| Zhao et al. 2017 | ACI(LAK + IL-2 or DC/CIK or CIK or AKT or TIL) vs CT | NSCLC, operated or non-operated | 8             | RCTs                                            | 483/432              | 1-year recurrence rate | RR              | -             | -                       | -                              | 0/6/2           | <0.001                | 0.54(0.42-0.71)    | <0.001                | 0.54(0.42-0.71)    | N               | 0(0.495)             | (0.39-0.75)                   | <b>0.41</b>           | p > 0.1                     | Suggestive           |                |
|                  |                                                      |                                 | 10            | RCTs and retrospective studies                  | 1079/1041            | recurrence rate        | RR              | R             | <0.00001                | 0.77(0.69-0.86)                | 56(0.02)        | 0/7/3                 | <0.001             | 0.80(0.72-0.89)       | <0.001             | 0.64(0.50-0.82) | N                    | 54.65(0.019)                  | (0.33-1.23)           | <b>0.01</b>                 | p > 0.1              | Weak           |
|                  |                                                      |                                 | 6             | RCTs                                            | 407/362              | 2-year recurrence rate | RR              | -             | -                       | -                              | -               | 0/3/3                 | <0.001             | 0.62(0.51-0.75)       | <0.001             | 0.62(0.51-0.75) | Y                    | 0(0.426)                      | (0.48-0.81)           | <b>0.80</b>                 | p > 0.1              | Suggestive     |
|                  |                                                      |                                 | 8             | RCTs and retrospective studies                  | 1003/971             | recurrence rate        | RR              | R             | <0.00001                | 0.79(0.73-0.86)                | 60(0.01)        | 0/3/5                 | <0.001             | 0.80(0.74-0.87)       | <0.001             | 0.70(0.59-0.84) | Y                    | 59.7(0.015)                   | (0.44-1.13)           | <b>0.03</b>                 | p > 0.1              | Weak           |
|                  |                                                      |                                 | 6             | RCTs                                            | 407/362              | 3-year recurrence rate | RR              | -             | -                       | -                              | -               | 0/5/1                 | 0.001              | 0.81(0.72-0.92)       | 0.001              | 0.81(0.72-0.92) | N                    | 0(0.772)                      | (0.68-0.97)           | <b>0.30</b>                 | p > 0.1              | Suggestive     |
|                  |                                                      |                                 | 8             | RCTs and retrospective studies                  | 1003/971             | recurrence rate        | RR              | F             | <0.00001                | 0.85(0.79-0.91)                | 0(0.50)         | 0/5/3                 | 0.001              | 0.84(0.79-0.90)       | <0.001             | 0.84(0.79-0.90) | Y                    | 0(0.507)                      | (0.78-0.91)           | <b>0.17</b>                 | p > 0.1              | Convincing     |
|                  |                                                      |                                 | 2             | RCTs                                            | 160/117              | 5-year recurrence rate | RR              | -             | -                       | -                              | -               | 0/2/0                 | 0.110              | 0.92(0.83-1.02)       | 0.110              | 0.92(0.83-1.02) | Y                    | 0(0.58)                       | -                     | -                           | p > 0.1              | No association |
|                  |                                                      |                                 | 4             | RCTs and retrospective studies                  | 756/726              | recurrence rate        | RR              | F             | 0.0004                  | 0.90(0.85-0.95)                | 0(0.69)         | 0/2/2                 | <0.001             | 0.89(0.85-0.95)       | <0.001             | 0.89(0.85-0.95) | Y                    | 0(0.699)                      | (0.79-1.01)           | <b>0.99</b>                 | p > 0.1              | Suggestive     |
|                  |                                                      |                                 | 13            | RCTs                                            | 718/844              | 1-year OS              | RR              | -             | -                       | -                              | -               | 0/8/5                 | <0.001             | 1.15(1.10-1.21)       | <0.001             | 1.19(1.11-1.27) | Y                    | 25.14(0.19)                   | (1.03-1.37)           | <b>0.01</b>                 | p > 0.1              | Weak           |
|                  |                                                      |                                 | 15            | RCTs and observation studies/prospective cohort | 779/907              | OS                     | RR              | R             | 0.001                   | 1.16(1.06-1.26)                | 62.9(0.001)     | 0/9/6                 | <0.001             | 1.14(1.09-1.19)       | <0.001             | 1.17(1.10-1.24) | Y                    | 32.35(0.11)                   | (1.00-1.36)           | <b>0.02</b>                 | p > 0.1              | Weak           |
|                  |                                                      |                                 | 11            | RCTs                                            | 669/755              | 2-year OS              | RR              | -             | -                       | -                              | -               | 0/5/6                 | <0.001             | 1.43(1.30-1.58)       | <0.001             | 1.43(1.30-1.58) | Y                    | 0(0.562)                      | (1.28-1.61)           | <b>0.24</b>                 | p > 0.1              | Convincing     |
|                  |                                                      |                                 | 13            | RCTs and observation studies/prospective cohort | 730/818              | OS                     | RR              | R             | <0.001                  | 1.38(1.24-1.55)                | 35.4(0.099)     | 0/6/7                 | <0.001             | 1.33(1.23-1.45)       | <0.001             | 1.35(1.20-1.51) | Y                    | 33.88(0.11)                   | (1.02-1.78)           | <b>0.24</b>                 | p > 0.1              | Convincing     |
|                  |                                                      |                                 | 8             | RCTs                                            | 529/613              | 3-year OS              | RR              | -             | -                       | -                              | -               | 0/5/3                 | <0.001             | 1.45(1.24-1.69)       | <0.001             | 1.45(1.24-1.69) | N                    | 0(0.639)                      | (1.19-1.76)           | <b>0.31</b>                 | p > 0.1              | Suggestive     |
|                  |                                                      |                                 | 10            | RCTs and observation studies/prospective cohort | 590/676              | OS                     | RR              | F             | <0.001                  | 1.42(1.24-1.61)                | 11.4(0.337)     | 0/6/4                 | <0.001             | 1.32(1.18-1.47)       | <0.001             | 1.32(1.17-1.49) | N                    | 7.37(0.374)                   | (1.09-1.60)           | <b>0.24</b>                 | p > 0.1              | Suggestive     |
|                  |                                                      |                                 | 5             | RCTs                                            | 400/485              | 5-year OS              | RR              | -             | -                       | -                              | -               | 0/2/3                 | <0.001             | 1.71(1.39-2.11)       | 0.031              | 1.67(1.05-2.67) | N                    | 77.03(0.002)                  | (0.32-8.72)           | <b>0.87</b>                 | p > 0.1              | Suggestive     |
| 6                | RCTs and observation studies/prospective cohort      | 419/506                         | OS            | RR                                              | R                    | 0.032                  | 1.56(1.04-2.33) | 75.5(0.01)    | 0/3/3                   | <0.001                         | 1.59(1.31-1.92) | 0.032                 | 1.56(1.04-2.33)    | N                     | 75.45 (<0.001)     | (0.41-5.85)     | <b>0.84</b>          | p > 0.1                       | Suggestive            |                             |                      |                |
| 4                | RCTs                                                 | 187/229                         | 1-year PFS    | RR                                              | -                    | -                      | -               | -             | 0/2/2                   | <0.001                         | 1.46(1.24-1.72) | 0.031                 | 1.46(1.24-1.72)    | Y                     | 0(0.877)           | (1.02-2.09)     | <b>0.16</b>          | p > 0.1                       | Suggestive            |                             |                      |                |
| 6                | RCTs and observation studies/prospective cohort      | 271/248                         | OS            | RR                                              | F                    | <0.001                 | 1.40(1.23-1.59) | 10.7(0.345)   | 0/2/3                   | <0.001                         | 1.32(1.18-1.47) | <0.001                | 1.32(1.18-1.47)    | Y                     | 0(0.493)           | (1.10-1.58)     | <b>0.17</b>          | p > 0.1                       | Suggestive            |                             |                      |                |
| 2                | RCTs                                                 | 137/138                         | 2-year PFS    | RR                                              | -                    | -                      | -               | -             | 0/1/1                   | <0.001                         | 1.69(1.29-2.23) | 0.027                 | 1.79(1.07-2.99)    | N                     | 68.9(0.073)        | -               | -                    | p > 0.1                       | Weak                  |                             |                      |                |
| 3                | RCTs and observation studies/prospective cohort      | 179/180                         | OS            | RR                                              | R                    | 0.029                  | 1.53(1.05-2.23) | 70.7(0.033)   | 0/2/1                   | <0.001                         | 1.42(1.17-1.73) | 0.024                 | 1.52(1.06-2.20)    | N                     | 68.64(0.041)       | (0.02-95.78)    | <b>0.07</b>          | p > 0.1                       | Weak                  |                             |                      |                |
| 3                | RCTs                                                 | 104/106                         | 1-year OS     | OR                                              | -                    | -                      | -               | -             | 0/3/0                   | 0.027                          | 2.00(1.08-3.70) | 0.027                 | 2.00(1.08-3.70)    | N                     | 0(0.733)           | (0.04-107.12)   | <b>0.12</b>          | p > 0.1                       | Weak                  |                             |                      |                |
| 4                | RCTs and controlled clinical trial                   | 145/150                         | OS            | OR                                              | F                    | 0.02                   | 2.00(1.12-3.56) | 0(0.89)       | 0/4/0                   | 0.019                          | 2.00(1.12-3.56) | 0.019                 | 2.00(1.12-3.56)    | N                     | 0(0.493)           | (0.56-7.12)     | <b>0.64</b>          | p > 0.1                       | Weak                  |                             |                      |                |
| Su et al. 2016   | DC/CIK vs obs with backbone TACE                     | HCC                             | 2             | RCTs                                            | 72/68                | 2-year OS              | OR              | -             | -                       | -                              | 0/2/0           | 0.028                 | 2.16(1.09-4.32)    | 0.028                 | 2.16(1.09-4.32)    | N               | 0(0.685)             | -                             | -                     | p > 0.1                     | Weak                 |                |
|                  |                                                      |                                 | 3             | RCTs and controlled clinical trial              | 113/112              | OS                     | OR              | F             | 0.04                    | 1.77(1.02-3.07)                | 0(0.59)         | 0/3/0                 | 0.042              | 1.77(1.02-3.08)       | 0.042              | 1.77(1.02-3.08) | N                    | 1.95(0.361)                   | (0.05-63.38)          | <b>0.42</b>                 | p > 0.1              | Weak           |
|                  |                                                      |                                 | 5             | RCTs                                            | 250/245              | Overall response       | OR              | -             | -                       | -                              | -               | 0/5/0                 | 0.046              | 1.47(1.01-2.16)       | 0.046              | 1.47(1.01-2.16) | N                    | 0(0.893)                      | (0.79-2.73)           | <b>0.47</b>                 | p > 0.1              | Weak           |
|                  |                                                      |                                 | 6             | RCTs and controlled clinical trial              | 291/289              | Overall response       | OR              | F             | 0.03                    | 1.51(1.05-2.16)                | 0(0.94)         | 0/6/0                 | 0.027              | 1.50(1.05-2.16)       | 0.027              | 1.50(1.05-2.16) | N                    | 0(0.819)                      | (0.90-2.51)           | <b>0.32</b>                 | p > 0.1              | Weak           |

| Author, year    | Comparison                                                                         | Cancer type             | N. of studies | Types of studies                               | Intervention/control | Outcome          | Me-<br>t-<br>rics | M<br>* | Reporte<br>d<br>p-Value<br>* | Reported<br>SE (95% CI)<br>* | Reported<br>I2 (%)<br>(p-Value)<br>* | R/N/S<br>† | F<br>p-<br>Value<br>§ | F SE<br>(95% CI) § | R<br>p-<br>Value<br>§ | R SE<br>(95% CI) § | C‡ | I2 (%)<br>(p-Value) § | 95%<br>Prediction<br>Interval | Edge<br>r p-<br>Value | Excess<br>Signifi-<br>cance | Level of<br>Evidence |
|-----------------|------------------------------------------------------------------------------------|-------------------------|---------------|------------------------------------------------|----------------------|------------------|-------------------|--------|------------------------------|------------------------------|--------------------------------------|------------|-----------------------|--------------------|-----------------------|--------------------|----|-----------------------|-------------------------------|-----------------------|-----------------------------|----------------------|
| Cao et al. 2014 | DC vs non-DC                                                                       | High-grade glioma       | 5             | RCTs                                           | 250/245              | DCR              | OR                | -      | -                            | -                            | -                                    | 0/3/2      | 0.013                 | 1.81(1.13-2.90)    | 0.033                 | 1.84(1.05-3.24)    | Y  | 17.82(0.302)          | (0.35-9.60)                   | <b>0.55</b>           | p > 0.1                     | Suggestive           |
|                 |                                                                                    |                         | 6             | RCTs and controlled clinical trial             | 291/289              |                  |                   | F      | 0.01                         | 1.81(1.15-2.83)              | 0(0.45)                              | 0/4/2      | 0.013                 | 1.79(1.13-2.82)    | 0.013                 | 1.79(1.13-2.82)    | Y  | 19.05(0.293)          | (0.85-3.75)                   | <b>0.61</b>           | p > 0.1                     | Suggestive           |
|                 |                                                                                    |                         | 4             | RCTs                                           | 132/127              | Quality of life  | OR                | -      | -                            | -                            | -                                    | 0/2/2      | 0.001                 | 3.07(1.58-5.97)    | 0.001                 | 3.07(1.58-5.97)    | N  | 0(0.95)               | (0.71-13.23)                  | <b>0.38</b>           | p > 0.1                     | Suggestive           |
|                 |                                                                                    |                         | 5             | RCTs and controlled clinical trial             | 173/171              |                  |                   | F      | <0.0001                      | 3.30(1.82-5.98)              | 0(0.97)                              | 0/2/3      | <0.001                | 3.26(1.79-5.93)    | <0.001                | 3.26(1.79-5.93)    | Y  | 0(0.453)              | (1.24-8.61)                   | <b>0.33</b>           | p > 0.1                     | Suggestive           |
|                 |                                                                                    |                         | 2             | RCTs                                           | 43/41                | 1-year OS        | OR                | -      | -                            | -                            | -                                    | 0/3/0      | 0.096                 | 2.43(0.85-6.93)    | 0.096                 | 2.43(0.85-6.93)    | Y  | 0(0.848)              | (0.00-2157.51)                | <b>0.27</b>           | p > 0.1                     | No association       |
|                 |                                                                                    |                         | 7             | RCTs and non-RCTs including historical cohorts | 98/256               |                  |                   | R      | 0.0006                       | 2.89(1.58-5.27)              | 45(0.09)                             | 0/6/1      | 0.012                 | 2.33(1.21-4.50)    | 0.023                 | 2.96(1.16-7.55)    | N  | 26.77(0.224)          | (0.27-32.68)                  | <b>0.02</b>           | p > 0.1                     | Weak                 |
|                 |                                                                                    |                         | 3             | RCTs                                           | 25/25                | 1.5-year OS      | OR                | -      | -                            | -                            | -                                    | 0/2/0      | 0.067                 | 3.24(0.92-11.41)   | 0.067                 | 3.24(0.92-11.41)   | Y  | 0(0.692)              | -                             | -                     | p > 0.1                     | No association       |
|                 |                                                                                    |                         | 6             | RCTs and non-RCTs including historical cohorts | 80/240               |                  |                   | R      | <0.00001                     | 5.13(2.80-9.41)              | 10(0.35)                             | 0/2/4      | <0.001                | 4.92(2.63-9.22)    | <0.001                | 5.00(2.57-9.73)    | Y  | 43.46(0.115)          | (1.53-16.32)                  | <b>0.15</b>           | p > 0.1                     | Suggestive           |
|                 |                                                                                    |                         | 3             | RCTs                                           | 44/42                | 2-year OS        | OR                | -      | -                            | -                            | -                                    | 0/3/0      | 0.038                 | 3.41(1.07-10.81)   | 0.038                 | 3.41(1.07-10.81)   | N  | 0(0.974)              | -                             | -                     | p > 0.1                     | Weak                 |
|                 |                                                                                    |                         | 7             | RCTs and non-RCTs including historical cohorts | 98/256               |                  |                   | R      | <0.00001                     | 4.69(2.48-8.85)              | 0(0.50)                              | 0/4/3      | <0.001                | 5.01(2.62-9.59)    | <0.001                | 5.01(2.62-9.59)    | Y  | 0(0.58)               | (2.00-12.57)                  | <b>0.42</b>           | p > 0.1                     | Suggestive           |
| Wu et al. 2017  | Additional mAB or VAX vs no additional therapy, with backbone therapy in both arms | Lung cancer or melanoma | 6             | RCTs                                           | NA                   | OS               | HR                | -      | -                            | -                            | -                                    | 0/5/1      | 0.030                 | 0.90(0.81-0.99)    | 0.043                 | 0.90(0.81-1.00)    | Y  | 8.22(0.364)           | (0.74-1.08)                   | <b>0.75</b>           | NA                          | Weak                 |
|                 |                                                                                    |                         | 7             | RCTs and open-label study                      | NA                   |                  |                   | R      | <0.001                       | 0.86(0.78-0.95)              | 1.2(0.415)                           | 0/6/1      | 0.010                 | 0.88(0.80-0.97)    | 0.014                 | 0.88(0.80-0.97)    | N  | 6.25(0.38)            | (0.75-1.03)                   | <b>0.57</b>           | NA                          | Weak                 |
|                 |                                                                                    |                         | 5             | RCTs                                           | NA                   | PFS              | HR                | -      | -                            | -                            | -                                    | 0/3/2      | <0.001                | 0.87(0.82-0.93)    | 0.122                 | 0.84(0.67-1.05)    | N  | 90.6(0)               | (0.35-1.98)                   | <b>0.38</b>           | NA                          | No association       |
|                 |                                                                                    |                         | 6             | RCTs and open-label study                      | NA                   |                  |                   | F      | NA                           | 0.93(0.72-1.14)              | 92.9(0.000)                          | 1/3/2      | 0.101                 | 0.95(0.89-1.01)    | 0.473                 | 0.91(0.72-1.17)    | Y  | 93.54(<0.001)         | (0.37-2.23)                   | <b>0.47</b>           | NA                          | No association       |
|                 |                                                                                    |                         | 7             | RCTs                                           | NA                   | Overall response | RR                | -      | -                            | -                            | -                                    | 0/5/2      | <0.001                | 1.64(1.38-1.96)    | 0.076                 | 1.46(0.96-2.22)    | N  | 78.05(0)              | (0.38-5.67)                   | <b>0.37</b>           | NA                          | No association       |
|                 |                                                                                    |                         | 8             | RCTs and open-label study                      | NA                   |                  |                   | R      | 0.034                        | 1.51(1.03-2.20)              | 74.9(0.000)                          | 0/6/2      | <0.001                | 1.66(1.40-1.97)    | 0.033                 | 1.51(1.03-2.20)    | Y  | 74.64(<0.001)         | (0.45-5.06)                   | <b>0.42</b>           | NA                          | Weak                 |

Abbreviations: RCT, randomized controlled trial; N., number; SE, standard effect; CI, confidence interval; M, model; F, fixed effect; R, random effect; NA, not available; C, concordance with largest study; Y, concordant with largest study; N, not concordant with largest study; OS, overall survival; PFS progression-free survival; RR, risk ratio; HR, hazard ratio; OR, odds ratio; ACI, adoptive cell immunotherapy; CIK, cytokine-induced killer cells; LAK, lymphokine-activated killer cells; IL-2, Interleukin-2; AT, adjuvant therapy; DC/CIK, dendritic cells with cytokine-induced killer cells; AKT, activated killer T-cells; TIL, tumor-infiltrating lymphocytes; CT, conventional therapy; DC, dendritic cell; mAB, monoclonal antibody; VAX, cancer vaccine; HCC, hepatocellular carcinoma, NSCLC, non-small cell lung cancer. † Number of individual studies of effect size with statistical significance in the reverse direction/not statistically significant/statistically significant. ‡ Concordance of fixed and random effects summary outcome with outcome of largest individual study. § Value obtained from re-analysis of original meta-analysis. All p-Values are two-sided.

Table S9. PRISMA (Preferred Reporting Items for Systematic Reviews and Meta-Analyses) Checklist.

| Section/topic | # | Checklist item | Reported on page # |
|---------------|---|----------------|--------------------|
|---------------|---|----------------|--------------------|

**TITLE**

|       |   |                                                                     |   |
|-------|---|---------------------------------------------------------------------|---|
| Title | 1 | Identify the report as a systematic review, meta-analysis, or both. | 1 |
|-------|---|---------------------------------------------------------------------|---|

**ABSTRACT**

|                    |   |                                                                                                                                                                                                                                                                                                             |   |
|--------------------|---|-------------------------------------------------------------------------------------------------------------------------------------------------------------------------------------------------------------------------------------------------------------------------------------------------------------|---|
| Structured summary | 2 | Provide a structured summary including, as applicable: background; objectives; data sources; study eligibility criteria, participants, and interventions; study appraisal and synthesis methods; results; limitations; conclusions and implications of key findings; systematic review registration number. | 1 |
|--------------------|---|-------------------------------------------------------------------------------------------------------------------------------------------------------------------------------------------------------------------------------------------------------------------------------------------------------------|---|

**INTRODUCTION**

|            |   |                                                                                                                                                            |     |
|------------|---|------------------------------------------------------------------------------------------------------------------------------------------------------------|-----|
| Rationale  | 3 | Describe the rationale for the review in the context of what is already known.                                                                             | 1-2 |
| Objectives | 4 | Provide an explicit statement of questions being addressed with reference to participants, interventions, comparisons, outcomes, and study design (PICOS). | 1-2 |

**METHODS**

|                                    |    |                                                                                                                                                                                                                        |                  |
|------------------------------------|----|------------------------------------------------------------------------------------------------------------------------------------------------------------------------------------------------------------------------|------------------|
| Protocol and registration          | 5  | Indicate if a review protocol exists, if and where it can be accessed (e.g., Web address), and, if available, provide registration information including registration number.                                          | 14               |
| Eligibility criteria               | 6  | Specify study characteristics (e.g., PICOS, length of follow-up) and report characteristics (e.g., years considered, language, publication status) used as criteria for eligibility, giving rationale.                 | 14               |
| Information sources                | 7  | Describe all information sources (e.g., databases with dates of coverage, contact with study authors to identify additional studies) in the search and date last searched.                                             | 14               |
| Search                             | 8  | Present full electronic search strategy for at least one database, including any limits used, such that it could be repeated.                                                                                          | 14               |
| Study selection                    | 9  | State the process for selecting studies (i.e., screening, eligibility, included in systematic review, and, if applicable, included in the meta-analysis).                                                              | 14, figure S1    |
| Data collection process            | 10 | Describe method of data extraction from reports (e.g., piloted forms, independently, in duplicate) and any processes for obtaining and confirming data from investigators.                                             | 14-15            |
| Data items                         | 11 | List and define all variables for which data were sought (e.g., PICOS, funding sources) and any assumptions and simplifications made.                                                                                  | 14-15            |
| Risk of bias in individual studies | 12 | Describe methods used for assessing risk of bias of individual studies (including specification of whether this was done at the study or outcome level), and how this information is to be used in any data synthesis. | 15               |
| Summary measures                   | 13 | State the principal summary measures (e.g., risk ratio, difference in means).                                                                                                                                          | 15               |
| Synthesis of results               | 14 | Describe the methods of handling data and combining results of studies, if done, including measures of consistency (e.g., $I^2$ ) for each meta-analysis.                                                              | 15-16, figure S8 |

| Section/topic                 | #  | Checklist item                                                                                                                                                                                           | Reported on page #                |
|-------------------------------|----|----------------------------------------------------------------------------------------------------------------------------------------------------------------------------------------------------------|-----------------------------------|
| Risk of bias across studies   | 15 | Specify any assessment of risk of bias that may affect the cumulative evidence (e.g., publication bias, selective reporting within studies).                                                             | 15                                |
| Additional analyses           | 16 | Describe methods of additional analyses (e.g., sensitivity or subgroup analyses, meta-regression), if done, indicating which were pre-specified.                                                         | 15                                |
| <b>RESULTS</b>                |    |                                                                                                                                                                                                          |                                   |
| Study selection               | 17 | Give numbers of studies screened, assessed for eligibility, and included in the review, with reasons for exclusions at each stage, ideally with a flow diagram.                                          | 2-3                               |
| Study characteristics         | 18 | For each study, present characteristics for which data were extracted (e.g., study size, PICOS, follow-up period) and provide the citations.                                                             | Table S2-S8, reference appendix   |
| Risk of bias within studies   | 19 | Present data on risk of bias of each study and, if available, any outcome level assessment (see item 12).                                                                                                | Table S10                         |
| Results of individual studies | 20 | For all outcomes considered (benefits or harms), present, for each study: (a) simple summary data for each intervention group (b) effect estimates and confidence intervals, ideally with a forest plot. | 2-12, Table 1-3                   |
| Synthesis of results          | 21 | Present results of each meta-analysis done, including confidence intervals and measures of consistency.                                                                                                  | Table 1-3, Table S2-S8, Fig S2-S7 |
| Risk of bias across studies   | 22 | Present results of any assessment of risk of bias across studies (see Item 15).                                                                                                                          | 2-12, Table 1-3, Table S2-S8      |
| Additional analysis           | 23 | Give results of additional analyses, if done (e.g., sensitivity or subgroup analyses, meta-regression [see Item 16]).                                                                                    | Table S8                          |
| <b>DISCUSSION</b>             |    |                                                                                                                                                                                                          |                                   |
| Summary of evidence           | 24 | Summarize the main findings including the strength of evidence for each main outcome; consider their relevance to key groups (e.g., healthcare providers, users, and policy makers).                     | 12-13                             |
| Limitations                   | 25 | Discuss limitations at study and outcome level (e.g., risk of bias), and at review-level (e.g., incomplete retrieval of identified research, reporting bias).                                            | 13-14                             |
| Conclusions                   | 26 | Provide a general interpretation of the results in the context of other evidence, and implications for future research.                                                                                  | 16                                |
| <b>FUNDING</b>                |    |                                                                                                                                                                                                          |                                   |
| Funding                       | 27 | Describe sources of funding for the systematic review and other support (e.g., supply of data); role of funders for the                                                                                  | 17 (None)                         |

---

systematic review.

---

*From:* Moher D, Liberati A, Tetzlaff J, Altman DG, The PRISMA Group (2009). Preferred Reporting Items for Systematic Reviews and Meta-Analyses: The PRISMA Statement. PLoS Med 6(7): e1000097. doi:10.1371/journal.pmed1000097. For more information, visit: [www.prisma-statement.org](http://www.prisma-statement.org).

**Table S10.** Quality of the individual studies in the eligible meta-analyses using the Cochrane risk of bias tool.

| Author, year                 | Random sequence generation (selection bias) | Allocation concealment (selection bias) | Blinding of patients and personnel (performance bias) | Blinding of outcome assessment (detection bias) | Incomplete outcome data (attrition bias) | Selective reporting bias (reporting bias) | Other bias |
|------------------------------|---------------------------------------------|-----------------------------------------|-------------------------------------------------------|-------------------------------------------------|------------------------------------------|-------------------------------------------|------------|
| <b>Bai et al. 2018</b>       |                                             |                                         |                                                       |                                                 |                                          |                                           |            |
| Aitchison 2014               | +                                           | ?                                       | ?                                                     | +                                               | +                                        | +                                         | ?          |
| Chamie 2016                  | +                                           | +                                       | ?                                                     | +                                               | +                                        | ?                                         | +          |
| Galligioni 1996              | ?                                           | +                                       | ?                                                     | +                                               | ?                                        | +                                         | ?          |
| Hass 2016                    | +                                           | +                                       | +                                                     | ?                                               | ?                                        | +                                         | +          |
| Hinotsu 2013                 | +                                           | ?                                       | ?                                                     | +                                               | +                                        | +                                         | ?          |
| Jocham 2004                  | +                                           | +                                       | ?                                                     | +                                               | -                                        | ?                                         | ?          |
| Margulis 2009                | +                                           | ?                                       | ?                                                     | +                                               | +                                        | +                                         | ?          |
| Messing 2003                 | +                                           | ?                                       | ?                                                     | +                                               | +                                        | +                                         | ?          |
| Passalacqua 2014             | +                                           | +                                       | ?                                                     | +                                               | +                                        | ?                                         | +          |
| Pizzocaro 2001               | ?                                           | ?                                       | ?                                                     | +                                               | +                                        | +                                         | ?          |
| Ravaud 2017                  | +                                           | +                                       | +                                                     | +                                               | +                                        | +                                         | +          |
| Wood 2008                    | +                                           | ?                                       | ?                                                     | +                                               | +                                        | ?                                         | +          |
| <b>Bauer et al. 2012</b>     |                                             |                                         |                                                       |                                                 |                                          |                                           |            |
| CALBG 9712                   | ?                                           | ?                                       | +                                                     | ?                                               | +                                        | ?                                         | ?          |
| CLL2007FMP                   | ?                                           | ?                                       | ?                                                     | ?                                               | ?                                        | -                                         | -          |
| GCLLSG CLL 8                 | +                                           | +                                       | +                                                     | ?                                               | +                                        | +                                         | ?          |
| Gribben 2005                 | ?                                           | ?                                       | ?                                                     | ?                                               | ?                                        | -                                         | -          |
| NCRI-CLL 201                 | ?                                           | ?                                       | +                                                     | ?                                               | +                                        | +                                         | ?          |
| REACH                        | ?                                           | ?                                       | +                                                     | ?                                               | +                                        | +                                         | ?          |
| Wierda 2011                  | ?                                           | ?                                       | ?                                                     | ?                                               | +                                        | -                                         | ?          |
| <b>Chen et al. 2014</b>      |                                             |                                         |                                                       |                                                 |                                          |                                           |            |
| Ma 2012                      | +                                           | +                                       | ?                                                     | +                                               | +                                        | ?                                         | +          |
| Shi 2012                     | +                                           | +                                       | ?                                                     | +                                               | +                                        | +                                         | +          |
| Yang 2013                    | ?                                           | ?                                       | -                                                     | +                                               | +                                        | ?                                         | +          |
| Zhan 2012                    | +                                           | +                                       | +                                                     | ?                                               | +                                        | +                                         | +          |
| Zheng 2012                   | +                                           | +                                       | ?                                                     | +                                               | +                                        | ?                                         | +          |
| Zhong 2011                   | ?                                           | ?                                       | -                                                     | +                                               | +                                        | ?                                         | +          |
| <b>Dammeijer et al. 2016</b> |                                             |                                         |                                                       |                                                 |                                          |                                           |            |
| Alfonso 2014                 | -                                           | +                                       | +                                                     | ?                                               | ?                                        | +                                         | +          |
| Butts 2005                   | +                                           | +                                       | +                                                     | -                                               | +                                        | +                                         | -          |
| Butts 2014                   | ?                                           | +                                       | ?                                                     | -                                               | +                                        | +                                         | +          |
| Giaccone 2015                | +                                           | ?                                       | +                                                     | +                                               | +                                        | +                                         | +          |
| Jin 2014                     | +                                           | +                                       | ?                                                     | ?                                               | ?                                        | ?                                         | ?          |
| Khranovska 2013              | ?                                           | ?                                       | ?                                                     | ?                                               | ?                                        | ?                                         | ?          |
| Kimura 2015                  | +                                           | ?                                       | -                                                     | -                                               | +                                        | +                                         | +          |
| Li 2012                      | -                                           | ?                                       | ?                                                     | ?                                               | +                                        | +                                         | +          |
| Neninger vinegaras 2008      | +                                           | +                                       | ?                                                     | ?                                               | +                                        | +                                         | +          |
| Nokihara 2015                | ?                                           | ?                                       | +                                                     | +                                               | ?                                        | +                                         | +          |

|                          |   |   |   |   |   |   |   |
|--------------------------|---|---|---|---|---|---|---|
| Quoix 2011               | + | - | - | - | + | + | + |
| Quoix 2012               | ? | ? | + | + | ? | + | + |
| Shi 2012                 | ? | ? | ? | ? | + | + | + |
| Shi 2014                 | - | ? | ? | ? | ? | + | + |
| Vansteenkiste 2013       | ? | ? | + | - | + | + | + |
| Vansteenkiste 2014       | ? | ? | + | ? | ? | + | ? |
| Wu 2008                  | ? | ? | ? | ? | + | + | + |
| Zhao 2014                | ? | ? | ? | ? | ? | + | + |
| <b>Hao et al. 2017</b>   |   |   |   |   |   |   |   |
| Checkmate037             | + | ? | - | - | + | + | ? |
| Checkmate066             | ? | ? | + | + | + | + | ? |
| Checkmate067             | ? | ? | + | + | + | + | ? |
| Checkmate069             | ? | ? | + | + | + | + | ? |
| KeyNote002               | + | + | + | + | + | + | ? |
| KeyNote006               | ? | ? | - | - | + | + | ? |
| <b>Jiang et al. 2013</b> |   |   |   |   |   |   |   |
| Ishikawa 2012            | + | ? | ? | ? | + | + | + |
| Kubo 2002                | + | ? | + | + | + | + | + |
| Li 2009                  | + | ? | ? | ? | + | + | + |
| Li 2010                  | + | + | ? | ? | + | + | + |
| Lin 2004                 | ? | ? | ? | ? | + | + | + |
| Lo 2007                  | + | + | ? | ? | + | + | + |
| Mazzaferro 2006          | + | ? | ? | ? | + | + | + |
| Paio 2005                | + | ? | + | + | + | + | + |
| Shiratori 2003           | + | + | + | + | + | + | + |
| Sun 2006                 | + | + | + | + | + | + | + |
| <b>Lan et al. 2015</b>   |   |   |   |   |   |   |   |
| Gao 2014                 | ? | ? | + | + | + | ? | + |
| Li 2009                  | + | ? | + | + | + | ? | ? |
| Li 2012                  | + | ? | + | + | + | ? | + |
| Ni 2013                  | ? | - | + | + | + | ? | ? |
| Ren 2013                 | + | ? | + | + | + | ? | + |
| Sheng 2011               | ? | ? | + | + | + | ? | + |
| Yuan 2011                | + | - | + | + | + | ? | + |
| Yuan 2011                | + | - | + | + | + | ? | + |
| Yuan 2013                | ? | - | + | + | + | ? | ? |
| Zhang 2011               | ? | ? | + | + | + | ? | + |
| Zhong 2011               | ? | ? | + | + | + | ? | + |
| Zhu 2011                 | + | ? | + | + | + | ? | + |
| <b>Li et al. 2016</b>    |   |   |   |   |   |   |   |
| Dong 2009                | + | + | - | ? | + | + | + |
| Lee 2015                 | + | + | - | + | + | + | + |
| Pan 2010                 | + | + | - | ? | + | + | + |
| Takayama 2000            | + | + | - | + | + | + | + |
| Weng 2008                | + | + | - | ? | + | + | + |
| Xu 2013                  | + | ? | - | ? | + | + | + |



|                             |   |   |   |   |   |   |   |
|-----------------------------|---|---|---|---|---|---|---|
| Yu 2014                     | + | + | - | + | + | + | + |
| Zhao 2008                   | + | + | - | ? | + | + | + |
| <b>Mao et al. 2015</b>      |   |   |   |   |   |   |   |
| Baer 2008                   | ? | ? | + | - | + | + | + |
| Blaise 2000                 | ? | ? | + | - | + | ? | + |
| Faber 1997                  | ? | ? | + | - | ? | ? | ? |
| Kolitz 2014                 | ? | ? | + | - | + | + | + |
| Lange 2011                  | ? | + | + | - | + | + | + |
| Liu 2011                    | + | ? | ? | ? | ? | + | ? |
| Pautas 2010                 | ? | ? | + | - | + | + | + |
| Petit 2014                  | ? | ? | + | - | + | + | + |
| Willemze 2011               | ? | + | + | - | + | + | + |
| <b>Mocellin et al. 2013</b> |   |   |   |   |   |   |   |
| Agarwala 2011               | ? | ? | + | + | ? | ? | + |
| Cameron 2001                | ? | ? | + | + | + | + | + |
| Cascinelli 2001             | ? | + | + | + | + | + | + |
| Creagan 1995                | ? | ? | + | + | + | + | + |
| Eggermont 2005              | + | + | + | + | + | + | + |
| Eggermont 2008              | + | + | + | + | + | + | + |
| Garbe 2008                  | + | + | + | + | + | + | + |
| Grob 1998                   | + | + | + | + | + | + | + |
| Hancock 2004                | + | + | + | + | + | + | + |
| Hansson 2011                | + | + | + | + | + | + | + |
| Kirkwood 1996               | + | ? | + | + | + | + | + |
| Kirkwood 2000               | + | ? | + | + | + | + | + |
| Kirkwood 2001               | ? | + | + | + | + | + | + |
| Kirkwood 2001               | ? | + | + | + | + | + | + |
| Kleeberg 2004               | ? | + | + | + | + | + | + |
| McMasters 2008              | ? | ? | + | + | ? | ? | + |
| Pehamberger<br>1998         | ? | ? | + | + | + | + | + |
| Rusciani 1997               | - | - | + | + | ? | - | + |
| <b>Sasse et al. 2005</b>    |   |   |   |   |   |   |   |
| Atkins 2003                 | ? | ? | - | ? | + | - | + |
| Atzpodien 2002              | + | + | - | ? | + | + | + |
| Bajetta 1994                | + | + | - | ? | + | + | + |
| Danson 2003                 | + | + | - | ? | + | + | + |
| Del Vecchio 2003            | ? | ? | - | ? | + | + | + |
| Eton 2002                   | ? | ? | - | ? | + | - | + |
| Falkson 1991                | ? | ? | - | ? | + | - | + |
| Falkson 1998                | + | + | - | ? | + | + | + |
| Gorbonova 2000              | ? | ? | - | ? | + | - | + |
| Johnston 1998               | + | + | - | ? | + | + | + |
| Kirkwood 1990               | + | ? | - | ? | + | - | + |
| Middleton 2000              | + | + | - | ? | + | + | + |
| Ridolfi 2002                | + | + | - | ? | + | + | + |
| Rosenberg 1999              | + | + | - | ? | + | + | + |
| Spieth 2003                 | ? | ? | - | ? | + | - | + |

|                              |   |   |   |   |   |   |   |
|------------------------------|---|---|---|---|---|---|---|
| Thomson 1993                 | + | + | - | ? | + | - | + |
| Vorobiof 1994                | + | + | - | ? | + | + | + |
| Young 2001                   | + | + | - | ? | + | + | + |
| <b>Unverzagt et al. 2017</b> |   |   |   |   |   |   |   |
| Amato 2010                   | ? | ? | + | + | + | - | - |
| Escudier 2007                | + | + | + | + | + | + | - |
| Hudes 2007                   | ? | ? | + | + | + | + | + |
| Motzer 2007                  | + | ? | + | + | + | + | - |
| Motzer 2015                  | + | + | + | + | + | + | - |
| Negrier 2011                 | + | + | + | + | + | - | - |
| Rini 2010                    | + | ? | + | + | + | + | - |
| Rini 2015                    | ? | + | + | + | + | + | + |
| <b>Wang et al. 2015</b>      |   |   |   |   |   |   |   |
| Li 2009                      | + | + | + | + | + | + | + |
| Shi 2012                     | + | + | + | + | + | + | + |
| Shi 2014                     | + | + | + | + | + | + | + |
| Yang 2013                    | + | + | + | + | + | + | + |
| Zhao 2014                    | + | + | + | + | + | + | + |
| Zhong 2011                   | + | + | + | + | + | + | + |
| <b>Wang et al. 2015</b>      |   |   |   |   |   |   |   |
| Alfonso 2014                 | + | + | + | + | + | + | + |
| Butts 2005                   | + | + | ? | ? | + | + | + |
| Butts 2011                   | + | + | ? | ? | + | + | + |
| Butts 2014                   | + | + | + | + | + | + | + |
| Manegold 2008                | + | + | ? | ? | + | + | + |
| Mitchell 2013                | + | + | + | + | + | + | + |
| Nemunaitis 2004              | + | ? | ? | ? | + | + | + |
| Nemunaitis 2006              | + | ? | ? | ? | + | + | + |
| O'Brien 2004                 | + | + | ? | ? | + | + | + |
| Quiox 2011                   | + | + | ? | ? | + | + | + |
| Vinageras 2008               | + | + | ? | ? | + | + | + |
| <b>Wu et al. 2017</b>        |   |   |   |   |   |   |   |
| Antonia 2016                 | - | ? | - | - | + | ? | ? |
| Hodi 2010                    | + | + | + | + | + | + | + |
| Hodi 2014                    | + | + | - | + | + | + | ? |
| Hodi 2016                    | + | + | + | + | + | + | ? |
| Larkin 2015                  | + | + | + | + | ? | + | + |
| Lynch 2011                   | + | ? | + | ? | + | ? | + |
| Reck 2013                    | + | ? | + | ? | + | ? | ? |
| Robert 2011                  | + | ? | + | ? | + | + | + |
| <b>Xin et al. 2016</b>       |   |   |   |   |   |   |   |
| Antoni 2013                  | + | + | ? | ? | + | + | + |
| Caria 1991                   | + | + | ? | ? | + | + | + |
| Caria 1995                   | + | + | ? | ? | + | + | + |
| Caria 1998                   | + | + | ? | ? | + | + | + |
| Emilio 1994                  | + | + | ? | ? | + | + | + |
| Galvez 1991                  | ? | ? | ? | ? | ? | ? | ? |
| Thomson 1993                 | ? | ? | ? | ? | ? | ? | ? |

|                          |   |   |   |   |   |   |   |
|--------------------------|---|---|---|---|---|---|---|
| Young 2001               | + | + | ? | ? | + | + | + |
| ZRUDOLF 1996             | ? | + | ? | ? | + | + | + |
| <b>Yu et al. 2017</b>    |   |   |   |   |   |   |   |
| Deng 2013                | + | ? | ? | ? | ? | ? | ? |
| Dong 2009                | + | ? | - | ? | + | + | + |
| Guo 2014                 | - | - | - | ? | + | + | - |
| Hao 2006                 | - | - | - | ? | + | + | - |
| Hao 2010                 | - | - | - | ? | + | + | - |
| He 2012                  | + | ? | ? | ? | ? | ? | ? |
| Huang 2007               | + | ? | ? | ? | ? | + | ? |
| Huang 2013               | - | - | - | ? | + | + | - |
| Lee 2015                 | + | + | - | + | + | + | + |
| Pan 2013                 | - | - | - | ? | + | + | - |
| Tong 2013                | - | - | - | ? | ? | + | - |
| Wang 2012                | - | - | - | ? | + | + | - |
| Weng 2009                | + | ? | ? | ? | + | + | + |
| Yu 2009                  | - | - | - | ? | + | + | - |
| Yu 2014                  | + | + | - | + | + | + | + |
| Yue 2007                 | - | - | - | ? | ? | + | - |
| Zhang 2006               | + | ? | ? | ? | ? | + | ? |
| <b>Yun et al. 2016</b>   |   |   |   |   |   |   |   |
| Hodi 2010                | + | + | + | + | + | + | ? |
| Ribas 2013               | + | + | ? | ? | + | + | ? |
| Ribas 2015               | + | + | + | + | + | + | ? |
| Robert 2011              | + | + | + | + | + | + | ? |
| Robert 2015              | + | + | + | + | + | + | ? |
| Weber 2015               | + | + | + | + | + | + | ? |
| <b>Zeng et al. 2016</b>  |   |   |   |   |   |   |   |
| Kimura 1997              | + | + | ? | ? | + | + | + |
| Kimura 2015              | + | + | ? | ? | + | + | + |
| Ratto 1996               | + | + | ? | + | + | + | + |
| Zhao 2014                | + | ? | ? | ? | + | + | + |
| <b>Zheng et al. 2015</b> |   |   |   |   |   |   |   |
| Li 2009                  | + | + | + | - | + | + | + |
| Shi 2012                 | + | - | + | + | + | + | + |
| Yang 2013                | + | - | + | - | - | + | + |
| Zhang 2012               | + | + | + | - | - | - | + |
| Zhao 2014                | + | - | + | + | + | + | + |
| Zhong 2011               | - | - | + | + | - | + | + |
| <b>Zhou et al. 2017</b>  |   |   |   |   |   |   |   |
| Gisselbrecht<br>2012     | + | - | - | - | + | + | + |
| Habermann 2006           | + | - | - | - | + | + | - |
| Haioun 2009              | + | - | - | - | + | + | - |
| Harig 2015               | + | - | - | - | + | - | - |
| Jaeger 2015              | + | - | - | - | + | + | - |
| <b>Zhu et al. 2015</b>   |   |   |   |   |   |   |   |
| Chen 2012                | + | ? | ? | ? | + | + | + |

|                             |   |   |   |   |   |   |   |
|-----------------------------|---|---|---|---|---|---|---|
| Chung 2013                  | + | + | ? | ? | + | + | + |
| Dong 2008                   | ? | + | + | + | + | + | + |
| Edward 1998                 | + | + | ? | ? | + | + | + |
| Hasegawa 2006               | ? | ? | - | - | + | + | + |
| Lau 1996                    | + | ? | ? | ? | + | + | + |
| Lo 2007                     | + | - | - | - | + | + | ? |
| Mazzaferro 2006             | + | - | + | + | + | + | + |
| Nishiguchi 2005             | ? | ? | ? | ? | + | + | + |
| Ono 1997                    | + | ? | ? | ? | + | ? | + |
| Sun 2006                    | ? | + | + | + | + | + | + |
| Tadatoshi 2000              | + | + | ? | ? | + | + | + |
| Xia 2010                    | + | ? | ? | ? | + | + | ? |
| Yamamoto 1996               | ? | ? | ? | ? | + | + | + |
| <b>Zhuansun et al. 2017</b> |   |   |   |   |   |   |   |
| Borghaei 2015               | + | + | + | + | + | + | + |
| Brahmer 2015                | + | + | + | + | + | + | + |
| Fehrenbacher<br>2016        | + | + | + | + | + | + | + |
| Herbst 2016                 | + | + | + | + | + | + | - |

#### Reference list of the eligible articles

44. Bai Y, Li S, Jia Z, Ding Y, Gu C, Yang J. Adjuvant therapy for locally advanced renal cell carcinoma: A meta-analysis and systematic review. *Urol Oncol.* 2018;36(2):79.e1-79.e10, doi:10.1016/j.urolonc.2017.10.001.
45. Baldo P, Rupolo M, Compagnoni A, et al. Interferon-alpha for maintenance of follicular lymphoma. *Cochrane database Syst Rev.* 2010;(1):CD004629, doi:10.1002/14651858.CD004629.pub2.
46. Bauer K, Rancea M, Roloff V, et al. Rituximab, ofatumumab and other monoclonal anti-CD20 antibodies for chronic lymphocytic leukaemia. *Cochrane database Syst Rev.* 2012;11:CD008079, doi:10.1002/14651858.CD008079.pub2.
47. Buyse M, Squifflet P, Lange BJ, et al. Individual patient data meta-analysis of randomized trials evaluating IL-2 monotherapy as remission maintenance therapy in acute myeloid leukemia. *Blood.* 2011;117(26):7007-7013, doi:10.1182/blood-2011-02-337725.
48. Canil C, Hotte S, Mayhew L a, Waldron TS, Winquist E. Interferon-alfa in the treatment of patients with inoperable locally advanced or metastatic renal cell carcinoma: A systematic review. *Can Urol Assoc J.* 2010;4(3):201-208. <http://www.pubmedcentral.nih.gov/articlerender.fcgi?artid = 2874597&tool = pmcentrez&rendertype = abstract>.
49. Cao J-X, Zhang X-Y, Liu J-L, et al. Clinical efficacy of tumor antigen-pulsed DC treatment for high-grade glioma patients: Evidence from a meta-analysis. *PLoS ONE.* 2014;9(9):e107173, doi:10.1371/journal.pone.0107173.
50. Chen R, Deng X, Wu H, et al. Combined immunotherapy with dendritic cells and cytokine-induced killer cells for malignant tumors: A systematic review and meta-analysis. *Int Immunopharmacol.* 2014;22(2):451-464, doi:10.1016/j.intimp.2014.07.019.
51. Dammeijer F, Lievens LA, Veerman GDM, et al. Efficacy of Tumor Vaccines and Cellular Immunotherapies in Non-Small-Cell Lung Cancer: A Systematic Review and Meta-Analysis. *J Clin Oncol.* 2016;34(26):3204-3212, doi:10.1200/JCO.2015.66.3955.
52. Ding M, Yang J. Therapeutic vaccination for non-small-cell lung cancer: A meta-analysis. *Med Oncol.* 2014;31(4):928, doi:10.1007/s12032-014-0928-1.
53. Gao G, Liang X, Jiang J, et al. A systematic review and meta-analysis of immunochemotherapy with rituximab for B-cell non-Hodgkin's lymphoma. *Acta Oncol.* 2010;49(1):3-12, doi:10.3109/02841860903150502.
54. Guan X, Wang H, Ma F, Qian H, Yi Z, Xu B. The Efficacy and Safety of Programmed Cell Death 1 and Programmed Cell Death 1 Ligand Inhibitors for Advanced Melanoma: A Meta-Analysis of Clinical Trials

- Following the PRISMA Guidelines. *Medicine* (Baltimore). 2016;95(11):e3134, doi:10.1097/MD.0000000000003134.
55. Hamm C, Verma S, Petrella T, Bak K, Charette M, Melanoma Disease Site Group of Cancer Care Ontario's Program in Evidence-based Care. Biochemotherapy for the treatment of metastatic malignant melanoma: A systematic review. *Cancer Treat Rev*. 2008;34(2):145-156, doi:10.1016/j.ctrv.2007.10.003.
  56. Han R, Liu X, Pan P, Jia Y, Yu J. Effectiveness and safety of chemotherapy combined with dendritic cells co-cultured with cytokine-induced killer cells in the treatment of advanced non-small-cell lung cancer: A systematic review and meta-analysis. *PLoS ONE*. 2014;9(9):e108958, doi:10.1371/journal.pone.0108958.
  57. Hao C, Tian J, Liu H, Li F, Niu H, Zhu B. Efficacy and safety of anti-PD-1 and anti-CTLA-4 combined with anti-CTLA-4 immunotherapy to advanced melanoma: A systematic review and meta-analysis of randomized controlled trials. *Medicine* (Baltimore). 2017;96(26):e7325, doi:10.1097/MD.0000000000007325.
  58. Hotte S, Waldron T, Canil C, Winquist E. Interleukin-2 in the treatment of unresectable or metastatic renal cell cancer: A systematic review and practice guideline. *Can Urol Assoc J*. 2007;1(1):27-38. <http://www.pubmedcentral.nih.gov/articlerender.fcgi?artid = 2422922&tool = pmcentrez&rendertype = abstract>.
  59. Hou S, Yang W. A meta-analysis on Rituximab combined CHOP chemotherapy for non-Hodgkin lymphoma in China. *Saudi Med J*. 2011;32(7):675-678. <http://www.ncbi.nlm.nih.gov/pubmed/21748202>.
  60. Ives NJ, Stowe RL, Lorigan P, Wheatley K. Chemotherapy compared with biochemotherapy for the treatment of metastatic melanoma: A meta-analysis of 18 trials involving 2,621 patients. *J Clin Oncol*. 2007;25(34):5426-5434, doi:10.1200/JCO.2007.12.0253.
  61. Ives NJ, Suci S, Eggermont AMM, et al. Adjuvant interferon- $\alpha$  for the treatment of high-risk melanoma: An individual patient data meta-analysis. *Eur J Cancer*. 2017;82:171-183, doi:10.1016/j.ejca.2017.06.006.
  62. Jiang S, Liu Y, Wang L, Duan C, Liu M. A meta-analysis and systematic review: Adjuvant interferon therapy for patients with viral hepatitis-related hepatocellular carcinoma. *World J Surg Oncol*. 2013;11(1):240, doi:10.1186/1477-7819-11-240.
  63. Kawalec P, Paszulewicz A, Holko P, Pilc A. Sipuleucel-T immunotherapy for castration-resistant prostate cancer. A systematic review and meta-analysis. *Arch Med Sci*. 2012;8(5):767-775, doi:10.5114/aoms.2012.31610.
  64. Lan X-P, Chen Y-G, Wang Z, et al. Immunotherapy of DC-CIK cells enhances the efficacy of chemotherapy for solid cancer: A meta-analysis of randomized controlled trials in Chinese patients. *J Zhejiang Univ Sci B*. 2015;16(9):743-756, doi:10.1631/jzus.B1500003.
  65. Li Y-C, Zhao L, Wu J-P, Qu C-X, Song Q-K, Wang R-B. Cytokine-induced killer cell infusion combined with conventional treatments produced better prognosis for hepatocellular carcinoma patients with barcelona clinic liver cancer B or earlier stage: A systematic review and meta-analysis. *Cytotherapy*. 2016;18(12):1525-1531, doi: 10.1016/j.jcyt.2016.09.002.
  66. Mao C, Fu X-H, Yuan J-Q, et al. Interleukin-2 as maintenance therapy for children and adults with acute myeloid leukaemia in first complete remission. *Cochrane database Syst Rev*. 2015;(11):CD010248, doi: 10.1002/14651858.CD010248.pub2.
  67. Massari F, Bria E, Maines F, et al. Adjuvant treatment for resected renal cell carcinoma: Are all strategies equally negative? Potential implications for trial design with targeted agents. *Clin Genitourin Cancer*. 2013;11(4):471-476, doi: 10.1016/j.clgc.2013.04.018.
  68. Mi D, Ren W, Yang K. Adoptive immunotherapy with interleukin-2 & induced killer cells in non-small cell lung cancer: A systematic review & meta-analysis. *Indian J Med Res*. 2016;143(Supplement):S1-S10, doi:10.4103/0971-5916.191738.
  69. Mocellin S, Lens MB, Pasquali S, Pilati P, Chiarion Sileni V. Interferon alpha for the adjuvant treatment of cutaneous melanoma. *Cochrane database Syst Rev*. 2013;6(6):CD008955, doi: 10.1002/14651858.CD008955.pub2.
  70. Myeloma Trialists' Collaborative Group. Interferon as therapy for multiple myeloma: An individual patient data overview of 24 randomized trials and 4012 patients. *Br J Haematol*. 2001;113(4):1020-1034. <http://ovidsp.ovid.com/ovidweb.cgi?T=JS&PAGE=reference&D=med4&NEWS=N&AN=11442498>.
  71. Nunes AA, da Silva AS, Souza KM, Koury C de NS, de Mello LM. Rituximab, fludarabine, and cyclophosphamide versus fludarabine and cyclophosphamide for treatment of chronic lymphocytic leukemia: A systematic review with meta-analysis. *Crit Rev Oncol Hematol*. 2015;94(3):261-269, doi: 10.1016/j.critrevonc.2015.02.013.

72. Pirard D, Heenen M, Melot C, Vereecken P. Interferon alpha as adjuvant postsurgical treatment of melanoma: A meta-analysis. *Dermatology*. 2004;208(1):43-48, doi:10.1159/000075045.
73. Ren Y-R, Jin Y-D, Zhang Z-H, Li L, Wu P. Rituximab treatment strategy for patients with diffuse large B-cell lymphoma after first-line therapy: A systematic review and meta-analysis. *Chin Med J (Engl)*. 2015;128(3):378-383, doi:10.4103/0366-6999.150111.
74. Rossi A, Garassino MC, Cinquini M, et al. Maintenance or consolidation therapy in small-cell lung cancer: A systematic review and meta-analysis. *Lung Cancer*. 2010;70(2):119-128, doi:10.1016/j.lungcan.2010.02.001.
75. Roviello G, Zanotti L, Correale P, et al. Is still there a role for IL-2 for solid tumors other than melanoma or renal cancer? *Immunotherapy*. 2017;9(1):25-32, doi:10.2217/imt-2016-0107.
76. Sasse AD, Sasse EC, Clark LGO, Ulloa L, Clark OAC. Chemoimmunotherapy versus chemotherapy for metastatic malignant melanoma. *Cochrane database Syst Rev*. 2007;(1):CD005413, doi:10.1002/14651858.CD005413.pub2.
77. Scherr AJO, Lima JPSN, Sasse EC, Lima CSP, Sasse AD. Adjuvant therapy for locally advanced renal cell cancer: A systematic review with meta-analysis. *BMC Cancer*. 2011;11(1):115, doi:10.1186/1471-2407-11-115.
78. Schulz H, Bohlius JF, Trelle S, et al. Immunochemotherapy with rituximab and overall survival in patients with indolent or mantle cell lymphoma: A systematic review and meta-analysis. *J Natl Cancer Inst*. 2007;99(9):706-714, doi:10.1093/jnci/djk152.
79. Su Y, Yang Y, Ma Y, et al. The Efficacy and Safety of Dendritic Cells Co-Cultured with Cytokine-Induced Killer Cell Therapy in Combination with TACE-Predominant Minimally-Invasive Treatment for Hepatocellular Carcinoma: A Meta-Analysis. *Clin Lab*. 2016;62(4):599-608, doi:10.7754/Clin.Lab.2015.150804.
80. Tang X, Liu T, Zang X, et al. Adoptive cellular immunotherapy in metastatic renal cell carcinoma: A systematic review and meta-analysis. *PLoS ONE*. 2013;8(5):e62847, doi:10.1371/journal.pone.0062847.
81. Thirion P, Piedbois P, Buyse M, et al. Alpha-interferon does not increase the efficacy of 5-fluorouracil in advanced colorectal cancer. *Br J Cancer*. 2001;84(5):611-620, doi:10.1054/bjoc.2000.1669.
82. Unverzagt S, Moldenhauer I, Nothacker M, et al. Immunotherapy for metastatic renal cell carcinoma. *Cochrane database Syst Rev*. 2017;5(5):CD011673, doi:10.1002/14651858.CD011673.pub2.
83. Verma S, Quirt I, McCreedy D, Bak K, Charette M, Iscoe N. Systematic review of systemic adjuvant therapy for patients at high risk for recurrent melanoma. *Cancer*. 2006;106(7):1431-1442, doi:10.1002/cncr.21760.
84. Vidal L, Gafter-Gvili A, Leibovici L, et al. Rituximab maintenance for the treatment of patients with follicular lymphoma: Systematic review and meta-analysis of randomized trials. *J Natl Cancer Inst*. 2009;101(4):248-255, doi:10.1093/jnci/djn478.
85. Vidal L, Gafter-Gvili A, Salles G, et al. Rituximab maintenance improves overall survival of patients with follicular lymphoma-Individual patient data meta-analysis. *Eur J Cancer*. 2017;76(March):216-225, doi:10.1016/j.ejca.2017.01.021.
86. Wang H, Liu A, Bo W, et al. Adjuvant immunotherapy with autologous cytokine-induced killer cells for hepatocellular carcinoma patients after curative resection, a systematic review and meta-analysis. *Dig Liver Dis*. 2016;48(11):1275-1282, doi:10.1016/j.dld.2016.07.010.
87. Wang J, Zou Z-H, Xia H-L, He J-X, Zhong N-S, Tao A-L. Strengths and weaknesses of immunotherapy for advanced non-small-cell lung cancer: A meta-analysis of 12 randomized controlled trials. *PLoS ONE*. 2012;7(3):e32695, doi:10.1371/journal.pone.0032695.
88. Wang M, Cao J-X, Liu Y-S, et al. Evaluation of tumour vaccine immunotherapy for the treatment of advanced non-small cell lung cancer: A systematic meta-analysis. *BMJ Open*. 2015;5(4):e006321, doi:10.1136/bmjopen-2014-006321.
89. Wang S, Wang Z. Efficacy and safety of dendritic cells co-cultured with cytokine-induced killer cells immunotherapy for non-small-cell lung cancer. *Int Immunopharmacol*. 2015;28(1):22-28, doi:10.1016/j.intimp.2015.05.021.
90. Wang X, Bao Z, Zhang X, et al. Effectiveness and safety of PD-1/PD-L1 inhibitors in the treatment of solid tumors: A systematic review and meta-analysis. *Oncotarget*. 2017;8(35):59901-59914, doi:10.18632/oncotarget.18316.
91. Wheatley K, Ives N, Hancock B, Gore M, Eggermont A, Suci S. Does adjuvant interferon-alpha for high-risk melanoma provide a worthwhile benefit? A meta-analysis of the randomised trials. *Cancer Treat Rev*. 2003;29(4):241-252, doi:10.1016/S0305-7372(03)00074-4.

92. Wu Y, Shi H, Jiang M, et al. The clinical value of combination of immune checkpoint inhibitors in cancer patients: A meta-analysis of efficacy and safety. *Int J cancer*. 2017;141(12):2562-2570, doi:10.1002/ijc.31012.
93. Xie F, Zhang X, Li H, et al. Adoptive immunotherapy in postoperative hepatocellular carcinoma: A systemic review. *PLoS ONE*. 2012;7(8):e42879, doi:10.1371/journal.pone.0042879.
94. Xin Y, Huang Q, Zhang P, et al. Meta-Analysis of the Safety and Efficacy of Interferon Combined With Dacarbazine Versus Dacarbazine Alone in Cutaneous Malignant Melanoma. *Medicine (Baltimore)*. 2016;95(16):e3406, doi:10.1097/MD.0000000000003406.
95. Yu D-P, Cheng X, Liu Z-D, Xu S-F. Comparative beneficiary effects of immunotherapy against chemotherapy in patients with advanced NSCLC: Meta-analysis and systematic review. *Oncol Lett*. 2017;14(2):1568-1580, doi:10.3892/ol.2017.6274.
96. Yu R, Yang B, Chi X, et al. Efficacy of cytokine-induced killer cell infusion as an adjuvant immunotherapy for hepatocellular carcinoma: A systematic review and meta-analysis. *Drug Des Devel Ther*. 2017;11:851-864, doi:10.2147/DDDT.S124399.
97. Yuan B-H, Li R-H, Yuan W, et al. Harms and benefits of adoptive immunotherapy for postoperative hepatocellular carcinoma: An updated review. *Oncotarget*. 2017;8(11):18537-18549, doi:10.18632/oncotarget.14507.
98. Yun S, Vincelette ND, Green MR, Wahner Hendrickson AE, Abraham I. Targeting immune checkpoints in unresectable metastatic cutaneous melanoma: A systematic review and meta-analysis of anti-CTLA-4 and anti-PD-1 agents trials. *Cancer Med*. 2016;5(7):1481-1491, doi:10.1002/cam4.732.
99. Zeng Y, Ruan W, He J, et al. Adoptive Immunotherapy in Postoperative Non-Small-Cell Lung Cancer: A Systematic Review and Meta-Analysis. *PLoS ONE*. 2016;11(9):e0162630, doi:10.1371/journal.pone.0162630.
100. Zhao B, Zhang W, Yu D, Xu J, Wei Y. Adoptive immunotherapy shows encouraging benefit on non-small cell lung cancer: A systematic review and meta-analysis. *Oncotarget*. 2017;8(68):113105-113119, doi:10.18632/oncotarget.19373.
101. Zheng C, Yu G, Wang H, et al. Meta-analysis of chemotherapy and dendritic cells with cytokine-induced killer cells in the treatment of non-small-cell lung cancer. *Int J Clin Exp Med*. 2015;8(8):14527-14537. <http://www.ncbi.nlm.nih.gov/pubmed/26550444>.
102. Zhou G-W, Xiong Y, Chen S, Xia F, Li Q, Hu J. Anti-PD-1/PD-L1 antibody therapy for pretreated advanced nonsmall-cell lung cancer: A meta-analysis of randomized clinical trials. *Medicine (Baltimore)*. 2016;95(35):e4611, doi:10.1097/MD.0000000000004611.
103. Zhou L, Wang X-L, Deng Q-L, Du Y-Q, Zhao N-Q. The efficacy and safety of immunotherapy in patients with advanced NSCLC: A systematic review and meta-analysis. *Sci Rep*. 2016;6(1):32020, doi:10.1038/srep32020.
104. Zhou X, Ma T, Zhang Y, Zhou N, Li J. Rituximab maintenance therapy for patients with diffuse large B-cell lymphoma: A meta-analysis. *PLoS ONE*. 2017;12(3):e0174648, doi:10.1371/journal.pone.0174648.
105. Zhu G-Q, Shi K-Q, Yu H-J, et al. Optimal adjuvant therapy for resected hepatocellular carcinoma: A systematic review with network meta-analysis. *Oncotarget*. 2015;6(20):18151-18161, doi:10.18632/oncotarget.4098.
106. Zhuansun Y, Huang F, Du Y, Lin L, Chen R, Li J. Anti-PD-1/PD-L1 antibody versus conventional chemotherapy for previously-treated, advanced non-small-cell lung cancer: A meta-analysis of randomized controlled trials. *J Thorac Dis*. 2017;9(3):655-665, doi:10.21037/jtd.2017.03.104.

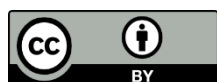

Supplement: cancers-11-01801-s001.pdf [file cancers-11-01801-s001.pdf]
